# Supplementary material
Source: publisher site journal article supplement (https://www.spandidos-publications.com/3121/downloadSupplementary)
Supplement: Supplementary file 1 [file downloadSupplementary]

## Sheet: Table S1
Table SI. lncRNA ide+A21250ntification.
LncRNA_id	NONCODE_id	LncRNA_source	LncRNA_name	Ensembl_name	Louse	Length	Case1_FPKM	Case2_FPKM	Case3_FPKM	Control1_FPKM	Control2_FPKM	Control3_FPKM	Case1_count	Case2_count	Case3_count	Control1_count	Control2_count	Control3_count
NONRATT009236.2	NONRATT009236.2	PMID24510058	stajor.aSep08-unspliced	-	14:12027379-12028509	1131	0.220634	0.418714	0.625326	0.390255	0.72347	0.936192	6	10	15	10	18	23
NONRATT013109.2	NONRATT013109.2	PMID24510058	fago.aSep08-unspliced	-	17:76990268-76991231	964	0.517669	0.294721	0.146711	0.228954	0.28295	0.143287	12	6	3	5	6	3
NONRATT019529.2	NONRATT019529.2	PMID24510058	marchor.aSep08-unspliced	-	3:94616616-94618585	1970	16.5927	16.2015	11.1529	12.7938	14.0989	14.3016	786	674	466	571	611	612
NONRATT015966.2	NONRATT015966.2	-	-	-	2:22073894-22079050	608	0.478815	0.856772	0.542819	0.363012	0.373803	0.605726	7	11	7	5	5	8
NONRATT000938.2	NONRATT000938.2	PMID24510058	Picalm.cSep08	-	1:154424299-154457485	1265	0.953376	2.58298	2.83265	1.22126	1.4374	2.32909	29	69	76	35	40	64
NONRATT006170.2	NONRATT006170.2	PMID24510058	Cd79b.bSep08-unspliced	-	10:94498045-94498765	721	0	0.0656753	0.0653638	0.0612484	0	0.0638814	0	1	1	1	0	1
NONRATT023338.2	NONRATT023338.2	PMID24510058	LOC689696.aSep08	-	5:93163748-93365630	401	9.1264	10.392	16.3432	12.6586	11.7896	13.432	88	88	139	115	104	117
NONRATT022158.2	NONRATT022158.2	PMID24510058	peever.aSep08-unspliced	-	5:45037356-45038129	774	0.107449	0.795376	0.304563	0.171106	0.117489	0.356862	2	13	5	3	2	6
NONRATT008720.2	NONRATT008720.2	PMID24510058	Ppfia4.dSep08	-	13:51136381-51137480	640	17.5446	9.3969	1.25242	5.17264	7.45794	0.43158	270	127	17	75	105	6
NONRATT007942.2	NONRATT007942.2	PMID24510058	blerlo.aSep08	-	12:37453052-37454056	728	0.114238	0.325219	0.259072	0.181917	0.187338	0.252941	2	5	4	3	3	4
NONRATT013964.2	NONRATT013964.2	PMID24510058	moyfee.aSep08-unspliced	-	18:79447386-79448248	863	2.2167	2.3046	2.84092	2.55733	2.31766	1.70704	46	42	52	50	44	32
ENSRNOT00000091969	ENSRNOT00000091969	ensembl:lincRNA	-	AABR07030914.1	10:109097346-109098945	611	0.680635	0.542493	0.694495	1.22809	0.967221	0.602752	10	7	9	17	13	8
ENSRNOT00000083777	NONRATT033343.1	ensembl	-	AABR07065364.1	6:124247096-124248134	570	0	0.0830735	0	0.0774738	0.0797284	0	0	1	0	1	1	0
NONRATT009208.2	NONRATT009208.2	PMID24510058	flarjor.aSep08-unspliced	-	14:8369576-8372671	3096	0.0940309	0.107062	0.0761408	0.0712892	0.132153	0.178431	7	7	5	5	9	12
NONRATT008514.2	NONRATT008514.2	PMID24510058	Parp1.gSep08	-	13:98886457-98887597	413	0.906259	0.917228	0.342445	0.427485	0.550296	1.00325	9	8	3	4	5	9
NONRATT010162.2	NONRATT010162.2	PMID24510058	noykar.aSep08-unspliced	-	14:104500585-104502626	2042	1.42562	1.64651	2.47055	1.75089	0.400707	2.41226	70	71	107	81	18	107
NONRATT023001.2	NONRATT023001.2	PMID24510058	LOC500392.bSep08	-	5:9035234-9036352	512	0.40616	0.554905	0.184184	0.51724	0.443891	0.35965	5	6	2	6	5	4
NONRATT006106.2	NONRATT006106.2	PMID24510058	Eftud2.cSep08	-	10:90934911-90940164	712	0.408876	0.66512	0.463531	0.43397	0.383095	0.711251	7	10	7	7	6	11
NONRATT019258.2	NONRATT019258.2	PMID24510058	sorchar.aSep08-unspliced	-	3:23075470-23075954	485	0.600246	0.488164	0.680483	0.819098	0.749802	0.664474	7	5	7	9	8	7
NONRATT000293.2	NONRATT000293.2	PMID24510058	Chmp2a.aSep08	-	1:65541206-65543703	1336	1.46302	3.72173	3.28203	2.01536	2.68801	3.89378	47	105	93	61	79	113
NONRATT029215.2	NONRATT029215.2	PMID24510058	Vegfa.jSep08	-	9:17344255-17347345	281	1.47996	1.17958	1.1745	1.0996	1.77949	1.31061	10	7	7	7	11	8
NONRATT027551.2	NONRATT027551.2	-	-	-	8:33389737-33392240	2504	0.348769	0.45387	1.29921	0.652223	1.59758	5.38681	21	24	69	37	88	293
NONRATT002761.2	NONRATT002761.2	PMID24510058	ryflu.aSep08	-	1:134873406-134885529	559	1.63667	1.94837	2.1086	1.89508	2.03301	2.38827	22	23	25	24	25	29
NONRATT020694.2	NONRATT020694.2	PMID24510058	LOC500251.dSep08-unspliced	-	4:119841075-119841444	370	0	0.255956	0	0.238583	0.245774	0.124482	0	2	0	2	2	1
NONRATT027067.2	NONRATT027067.2	PMID24510058	Vps28.eSep08	-	7:117684347-117685122	693	0.78011	0.888342	0.612318	0.891737	1.31195	0.930004	13	13	9	14	20	14
NONRATT030120.2	NONRATT030120.2	PMID24510058	zoypar.aSep08-unspliced	-	9:73461144-73462969	1826	6.42255	5.44603	3.66653	3.69848	5.20302	4.41201	282	210	142	153	209	175
NONRATT026789.2	NONRATT026789.2	PMID24510058	glusoy.aSep08-unspliced	-	7:125343898-125344871	974	0.426969	0.0972318	0.435664	0.090632	0.186681	0.330872	10	2	9	2	4	7
NONRATT007974.2	NONRATT007974.2	PMID24510058	Psmd9.bSep08	-	12:38793942-38804657	747	0.222665	0.316947	0.18933	0.295464	0.121736	0.123254	4	5	3	5	2	2
NONRATT009945.2	NONRATT009945.2	PMID24510058	GTP_EFTU_D3.0.aSep08-unspliced	-	14:66535908-66536467	560	0.0742549	0	0.0841559	0.0788573	0.0811522	0.0822474	1	0	1	1	1	1
NONRATT027563.2	NONRATT027563.2	PMID24510058	spawpey.aSep08	-	8:36702477-36706051	505	0.494132	0.375064	0.84027	0.349606	0.810188	0.273523	6	4	9	4	9	3
NONRATT026697.2	NONRATT026697.2	PMID24510058	Nudt4.cSep08	-	7:36646010-36648580	640	1.81943	0.739946	7.73525	1.31038	2.91213	14.5302	28	10	105	19	41	202
NONRATT004665.2	NONRATT004665.2	PMID24510058	tarnar.aSep08-unspliced	-	10:70441067-70441614	548	0.303524	0.259226	0.344169	0.402758	0.331801	0.420072	4	3	4	5	4	5
NONRATT009034.2	NONRATT009034.2	PMID24510058	spawly.aSep08-unspliced	-	13:96779310-96779713	404	0.205855	0.117208	0.116652	0.109307	0.112488	0.5698	2	1	1	1	1	5
NONRATT030125.2	NONRATT030125.2	PMID24510058	florpar.aSep08-unspliced	-	9:75018405-75019552	1148	7.35382	10.4362	8.13184	10.3044	11.0081	11.7897	203	253	198	268	278	294
NONRATT015031.2	NONRATT015031.2	PMID24510058	Hmgcs1.cSep08	-	2:52427659-52436381	624	0.866372	0.758919	1.1334	0.848875	0.801339	0.664007	13	10	15	12	11	9
NONRATT020727.2	NONRATT020727.2	PMID24510058	fleyzee.aSep08-unspliced	-	4:124830131-124830469	339	0.245326	0.419043	0.417196	0.2604	0.134057	0.543188	2	3	3	2	1	4
NONRATT007025.2	NONRATT007025.2	PMID24510058	Iqcb1.dSep08	-	11:66857737-66878560	822	1.11302	0	0.68828	0.859184	0.663602	0.560039	22	0	12	16	12	10
NONRATT011996.2	NONRATT011996.2	PMID24510058	Fat1.dSep08	-	16:50373404-50376717	1206	1.24141	1.60988	1.642	1.17119	1.31927	0.687093	36	41	42	32	35	18
NONRATT028568.2	NONRATT028568.2	PMID24510058	Atm.bSep08	-	8:58108008-58119853	921	0.225792	0.0514135	0.204782	0.0958475	0.246767	0.0999679	5	1	4	2	5	2
ENSRNOT00000087290	NONRATT032441.1	ensembl	-	AABR07072602.1	18:53216095-53272041	788	0.21108	0.300456	0.299152	0	0.288416	0.116841	4	5	5	0	5	2
NONRATT025201.2	NONRATT025201.2	PMID24510058	eIF-5_eIF-2B.0.aSep08-unspliced	-	6:108831954-108832543	590	3.17191	2.88943	0.479503	1.64589	2.00322	0.312103	45	36	6	22	26	4
NONRATT023821.2	NONRATT023821.2	PMID24510058	Vps13d.gSep08	-	5:162934856-162944847	575	0.433977	0.494107	0.573972	0.997937	0.553406	0.64049	6	6	7	13	7	8
NONRATT025164.2	NONRATT025164.2	PMID24510058	wytoy.aSep08-unspliced	-	6:105196270-105196937	668	4.48246	6.52187	10.8695	11.7618	9.93546	9.64824	72	92	154	178	146	140
NONRATT029156.2	NONRATT029156.2	PMID24510058	mopa.aSep08-unspliced	-	9:15105125-15105802	678	1.34941	1.53656	2.08619	1.56247	1.408	1.49377	22	22	30	24	21	22
NONRATT010399.2	NONRATT010399.2	PMID24510058	Mrpl52.eSep08	-	15:33069587-33072193	447	0.837327	0.847461	1.05473	1.77746	1.83052	0.617922	9	8	10	18	18	6
NONRATT014076.2	NONRATT014076.2	PMID24510058	merdar.bSep08	-	19:19903115-19904429	401	0.829681	1.18096	0.705503	1.6511	0.793538	0.918408	8	10	6	15	7	8
NONRATT025790.2	NONRATT025790.2	PMID24510058	RGD1561474.cSep08	-	7:54020319-54026831	1502	0.304561	0.189155	0.313891	0.264489	0.332913	0.245194	11	6	10	9	11	8
ENSRNOT00000081730	ENSRNOT00000081730	ensembl:lincRNA	-	AABR07024641.1	16:9896027-9899544	1813	0.0688077	0.026118	0.156044	0.0973807	0.050158	0.177755	3	1	6	4	2	7
NONRATT008893.2	NONRATT008893.2	-	-	-	13:80699701-80702327	377	4.74339	7.15967	11.7559	12.0594	8.31988	12.4554	43	57	94	103	69	102
NONRATT009009.2	NONRATT009009.2	PMID24510058	florly.aSep08-unspliced	-	13:93716482-93717141	660	0.252017	0.143491	0.071405	0.133751	0.137783	0.279001	4	2	1	2	2	4
NONRATT015025.2	NONRATT015025.2	PMID24510058	sparshor.aSep08-unspliced	-	2:44836495-44837226	732	0.68174	0.452818	0.450866	0.301518	0.0620836	0.188701	12	7	7	5	1	3
NONRATT006977.2	NONRATT006977.2	PMID24510058	sheemu.aSep08-unspliced	-	11:57890586-57892440	1855	1.30029	1.53167	1.42335	1.42771	1.27428	1.11677	58	60	56	60	52	45
ENSRNOT00000089529	NONRATT033603.1	ensembl	-	AABR07070087.1	8:51061686-51063453	710	0	0	0.0663765	0	0.192087	0	0	0	1	0	3	0
NONRATT020737.2	NONRATT020737.2	PMID24510058	jerwey.aSep08	-	4:123981547-123987099	682	0.670749	0.763808	0.622194	0.45306	0.466582	0.270001	11	11	9	7	7	4
NONRATT021678.2	NONRATT021678.2	PMID24510058	nawzer.aSep08-unspliced	-	4:133008974-133009449	476	0.0873587	0.397915	0.297121	0.278226	0.381989	0.483612	1	4	3	3	4	5
ENSRNOT00000077387	NONRATT033161.1	ensembl	-	AC127076.2	5:5055765-5065181	1342	0.0309857	0.0352846	0	0	0.0338638	0.0343208	1	1	0	0	1	1
NONRATT023835.2	NONRATT023835.2	PMID24510058	torvar.aSep08	-	5:164742431-164747065	218	0.190747	0.21721	0.21618	0.202569	0.208464	0.211278	1	1	1	1	1	1
ENSRNOT00000079074	NONRATT017433.2	PMID24510058	n5352	ACEA_U3	20:45357179-45357393	215	2.12768	0.880965	0.438615	0.821168	2.32575	1.2847	11	4	2	4	11	6
NONRATT002529.2	NONRATT002529.2	PMID24510058	Fxyd5.bSep08-unspliced	-	1:89464851-89465516	666	0.499553	0.63996	0.637142	0.729036	0.341249	0.829463	8	9	9	11	5	12
NONRATT002468.2	NONRATT002468.2	PMID24510058	sworfly.aSep08	-	1:87066286-87067045	348	0	0.136069	0.135423	0.253665	0.261312	0.132352	0	1	1	2	2	1
NONRATT030441.2	NONRATT030441.2	PMID24510058	Rbm3.kSep08	-	X:15098938-15100293	787	2.16657	1.20341	1.67743	0.95345	2.19495	1.98887	41	20	28	17	38	34
NONRATT028238.2	NONRATT028238.2	PMID24510058	Aasdhppt.bSep08	-	8:1438944-1450094	1781	10.7646	13.4539	13.9513	13.6558	9.97984	3.1535	461	506	527	551	391	122
NONRATT003812.2	NONRATT003812.2	PMID24510058	Erlin1.bSep08	-	1:263808771-263823145	432	0.0962564	0	0.109091	0.102222	0.105197	0.106617	1	0	1	1	1	1
NONRATT030372.2	NONRATT030372.2	PMID24510058	starper.aSep08-unspliced	-	9:114544880-114545288	409	0.305008	0.23155	0.691704	0.323804	0.555678	0.337724	3	2	6	3	5	3
NONRATT007324.2	NONRATT007324.2	PMID24510058	Micall2.bSep08	-	12:17014115-17016793	541	0.0768628	0.175053	0.174311	0.163171	0.0840022	0.425507	1	2	2	2	1	5
NONRATT015372.2	NONRATT015372.2	PMID24510058	Plrg1.bSep08	-	2:182050197-182055028	610	0.95449	0.698711	1.08208	0.434142	0.894231	0.528311	14	9	14	6	12	7
NONRATT017859.2	NONRATT017859.2	PMID24510058	RGD1304868.dSep08-unspliced	-	3:2177036-2177680	645	0.902696	0.73421	0.730952	0.205327	0.775249	1.14196	14	10	10	3	11	16
NONRATT021686.2	NONRATT021686.2	PMID24510058	Crbn.bSep08-unspliced	-	4:138885093-138885526	434	2.29979	3.81891	2.49863	3.6614	4.08495	3.92471	24	35	23	36	39	37
NONRATT026418.2	NONRATT026418.2	PMID24510058	shysy.aSep08-unspliced	-	7:10339962-10341642	1681	5.12109	2.67618	4.0389	2.10066	1.67661	1.88965	207	95	144	80	62	69
NONRATT004937.2	NONRATT004937.2	PMID24510058	Grn.bSep08	-	10:90380638-90381326	591	2.18136	1.84288	2.15399	3.5103	3.30744	2.10317	31	23	27	47	43	27
NONRATT030348.2	NONRATT030348.2	PMID24510058	Gin1.dSep08-unspliced	-	9:111219733-111220667	935	0.756136	0.962281	1.05893	1.03858	0.875127	1.13244	17	19	21	22	18	23
NONRATT013659.2	NONRATT013659.2	PMID24510058	marfa.aSep08-unspliced	-	18:3405019-3405533	515	0.80751	0.459727	1.5564	0.857045	1.05919	1.07267	10	5	17	10	12	12
ENSRNOT00000081199	NONRATT031810.1	ensembl	-	AABR07035780.3	12:22359482-22361493	1206	0.13792	0.157054	0.234583	0.146394	0.113086	0.152687	4	4	6	4	3	4
NONRATT011542.2	NONRATT011542.2	PMID24510058	Dlc1.bSep08	-	16:59242815-59244582	653	0.573178	0.290057	0.216584	0.540739	0.487303	0.70498	9	4	3	8	7	10
NONRATT016343.2	NONRATT016343.2	PMID24510058	bablo.aSep08-unspliced	-	2:123274272-123275369	1098	0.189393	0	1.03058	0.160793	0.289807	0.335411	5	0	24	4	7	8
NONRATT023886.2	NONRATT023886.2	PMID24510058	Slc45a1.bSep08-unspliced	-	5:167671990-167672529	540	0.15401	0.0876887	0	0.0817779	0	0	2	1	0	1	0	0
NONRATT025605.2	NONRATT025605.2	PMID24510058	zf-C2H2.58.aSep08-unspliced	-	7:13336080-13336863	784	0.106078	0.362387	0.360851	0.619309	0.173956	0.35231	2	6	6	11	3	6
NONRATT010130.2	NONRATT010130.2	PMID24510058	florjey.bSep08	-	14:88695470-88710042	267	0.622963	1.06409	1.05958	0.826634	0.681	0.344833	4	6	6	5	4	2
NONRATT026563.2	NONRATT026563.2	PMID24510058	Brd4.bSep08-unspliced	-	7:14238085-14239202	1118	3.6454	3.60031	6.1571	3.90862	5.4078	3.66476	98	85	146	99	133	89
NONRATT030295.2	NONRATT030295.2	PMID24510058	zornoy.aSep08	-	9:99178374-99299675	609	1.77549	1.6329	1.2387	1.37708	2.09004	2.04101	26	21	16	19	28	27
NONRATT021281.2	NONRATT021281.2	PMID24510058	RGD1560157.bSep08-unspliced	-	4:55505288-55506061	774	3.00888	3.85446	3.77672	3.99196	3.2302	3.50923	56	63	62	70	55	59
NONRATT016278.2	NONRATT016278.2	PMID24510058	goyshee.aSep08	-	2:112824223-112831476	622	0.20056	0	0.0757674	0	0.073063	0.0740491	3	0	1	0	1	1
NONRATT007316.2	NONRATT007316.2	PMID24510058	glulaw.aSep08-unspliced	-	12:16720361-16721279	919	0.543018	0.206102	0.666965	0.432277	0.593559	0.350674	12	4	13	9	12	7
NONRATT006969.2	NONRATT006969.2	PMID24510058	blawmu.aSep08-unspliced	-	11:57386937-57387664	728	0.228477	0.130088	0.129536	0.424432	0.624437	0.569149	4	2	2	7	10	9
NONRATT028885.2	NONRATT028885.2	PMID24510058	zurer.aSep08-unspliced	-	8:104415467-104416390	924	0.090006	0.102493	0.102059	0.143329	0.393565	0.0996433	2	2	2	3	8	2
NONRATT028203.2	NONRATT028203.2	PMID24510058	KRAB.29.aSep08	-	8:130543078-130574327	872	0.14306	0.162908	0	0	0.104285	0.0528194	3	3	0	0	2	1
NONRATT025726.2	NONRATT025726.2	PMID24510058	Pctk2.cSep08-unspliced	-	7:34077656-34078219	564	3.2444	3.77832	4.93218	3.28702	3.3852	3.91797	44	45	59	42	42	48
NONRATT030176.2	NONRATT030176.2	PMID24510058	Nhej1.cSep08	-	9:82322626-82327561	668	0.124499	0.283544	0.282342	0.330406	0.0680317	0.41349	2	4	4	5	1	6
NONRATT007760.2	NONRATT007760.2	PMID24510058	kulaw.aSep08-unspliced	-	12:12423241-12423655	415	9.92081	6.50409	11.1338	14.5715	5.80551	15.863	99	57	98	137	53	143
NONRATT022097.2	NONRATT022097.2	PMID24510058	lorvee.aSep08-unspliced	-	5:24416433-24418598	2166	1.8816	2.71097	0.848927	1.14121	0.419751	1.50904	98	124	39	56	20	71
NONRATT014445.2	NONRATT014445.2	-	-	-	19:9801797-9802368	572	0.145394	0.082783	0.164864	0.154328	0.635758	0.0805219	2	1	2	2	8	1
NONRATT003231.2	NONRATT003231.2	PMID24510058	pluflu.bSep08-unspliced	-	1:199379375-199380046	672	0.556972	0.140928	0.210461	0.591164	0.811727	1.09608	9	2	3	9	12	16
NONRATT010461.2	NONRATT010461.2	PMID24510058	plajo.aSep08-unspliced	-	15:36855236-36855815	580	0.430236	0.734851	0.894205	0.837135	0.86213	0.71438	6	9	11	11	11	9
NONRATT024482.2	NONRATT024482.2	PMID24510058	skotu.bSep08	-	6:103469745-103471748	692	0	0	0	0.127566	0.0656723	0.0665586	0	0	0	2	1	1
NONRATT028135.2	NONRATT028135.2	PMID24510058	Eomes.aSep08-unspliced	-	8:127151479-127151891	413	0.302054	0.114653	0.228335	0.213742	0.110037	0.222931	3	1	2	2	1	2
NONRATT011806.2	NONRATT011806.2	PMID24510058	feygee.aSep08-unspliced	-	16:14090543-14093519	2977	1.74619	3.14954	2.56569	0.993412	6.82559	0	125	198	162	67	447	0
NONRATT007770.2	NONRATT007770.2	PMID24510058	Grid2ip.bSep08	-	12:13225502-13226192	404	0.102928	0.117208	0.233422	0.218504	0.112488	0.227897	1	1	2	2	1	2
NONRATT022345.2	NONRATT022345.2	RefSeq	NR_110679	-	5:100650512-100688184	1398	0.0297445	0.0338712	0.0337105	0.031588	0.0325073	0.032946	1	1	1	1	1	1
NONRATT002330.2	NONRATT002330.2	PMID24510058	flawflor.aSep08-unspliced	-	1:78544844-78545405	562	1.92397	1.85372	1.67789	3.06306	1.77949	2.29357	26	22	20	39	22	28
NONRATT012519.2	NONRATT012519.2	PMID24510058	Crem.kSep08-unspliced	-	17:57060032-57060946	915	2.13616	2.22538	3.04016	2.412	1.93756	2.56592	47	43	59	50	39	51
NONRATT016242.2	NONRATT016242.2	PMID24510058	shobly.aSep08-unspliced	-	2:96589885-96590628	744	0	0.063645	0.12675	0	0.122226	0	0	1	2	0	2	0
NONRATT027110.2	NONRATT027110.2	PMID24510058	Pla2g6.eSep08	-	7:120549095-120549346	252	0.825214	0.375809	1.12265	1.22614	1.80393	1.09608	5	2	6	7	10	6
NONRATT026460.2	NONRATT026460.2	PMID24510058	bluroy.bSep08-unspliced	-	7:11429267-11430986	1720	8.80101	9.33324	8.49767	11.3429	13.056	12.9543	364	339	310	442	494	484
NONRATT018851.2	NONRATT018851.2	PMID24510058	slochy.aSep08	-	3:157154768-157190988	556	0	0.0851652	0	0.0794246	0.081736	0	0	1	0	1	1	0
NONRATT025062.2	NONRATT025062.2	PMID24510058	DNA_pol_E_B.0.bSep08	-	6:91494394-91498644	648	0.128342	0.146148	0.291056	0.272456	0	0.213162	2	2	4	4	0	3
NONRATT008966.2	NONRATT008966.2	PMID24510058	LOC688466.aSep08	-	13:89659466-89661150	894	1.53511	1.85393	1.68763	1.3331	2.18646	1.44182	33	35	32	27	43	28
NONRATT018668.2	NONRATT018668.2	-	-	-	3:138397706-138399052	443	1.50204	0.855113	0	1.09602	1.02616	0.519637	16	8	0	11	10	5
NONRATT002157.2	NONRATT002157.2	PMID24510058	Pde10a.bSep08-unspliced	-	1:52360279-52360945	667	0.872922	0.354962	0.636187	0.397042	0.545208	0.759236	14	5	9	6	8	11
NONRATT024617.2	NONRATT024617.2	PMID24510058	RGD1566401.gSep08	-	6:133658933-133663317	1516	0.0274293	0	0.0622047	0.0291293	0	0	1	0	2	1	0	0
NONRATT016892.2	NONRATT016892.2	PMID24510058	LOC680687.aSep08	-	2:240620154-240625971	1221	3.50816	2.59849	3.62979	2.92819	3.27627	3.35561	103	67	94	81	88	89
MSTRG.8077.1	-	-	-	-	15:42015752-42017954	2076	1.60259	2.37229	4.08802	3.57202	4.3137	3.32631	80	104	180	168	197	150
NONRATT018926.2	NONRATT018926.2	PMID24510058	bloshar.aSep08-unspliced	-	3:166469900-166470610	711	0.64339	0	1.061	0	0	1.03595	11	0	16	0	0	16
NONRATT025014.2	NONRATT025014.2	-	-	-	6:75793223-75798319	1592	3.8139	0.981599	0.799629	0.499073	0.799519	0.520499	146	33	27	18	28	18
NONRATT030473.2	NONRATT030473.2	PMID24510058	skeebo.aSep08-unspliced	-	X:20484544-20485072	529	6.76083	6.80327	5.70413	6.50837	7.99169	6.00472	86	76	64	78	93	69
NONRATT025109.2	NONRATT025109.2	-	-	-	6:96167214-96171613	882	0.612943	0.375809	0.427675	0.100086	0.309256	0.156609	13	7	8	2	6	3
NONRATT001417.2	NONRATT001417.2	PMID24510058	sleegloy.aSep08-unspliced	-	1:219993775-219994521	747	0.66805	0.380336	0.18933	0.295464	0.486819	0.554672	12	6	3	5	8	9
NONRATT026666.2	NONRATT026666.2	-	-	-	7:31818449-31824012	806	1.18675	1.29254	1.05294	0.711928	1.07157	1.14231	23	22	18	13	19	20
NONRATT014745.2	NONRATT014745.2	PMID24510058	Maf.cSep08	-	19:47695343-48195774	523	1.74933	2.80689	2.16363	1.51917	1.65141	2.37662	22	31	24	18	19	27
NONRATT008218.2	NONRATT008218.2	PMID24510058	LSM.1.bSep08	-	13:50252710-50258947	417	4.98652	12.2645	7.12315	5.50421	4.57854	2.98075	50	108	63	52	42	27
NONRATT017857.2	NONRATT017857.2	PMID24510058	RGD1304868.iSep08	-	3:2173188-2174031	370	0.899195	1.15193	0.637113	0.8351	0.860023	1.36868	8	9	5	7	7	11
NONRATT025738.2	NONRATT025738.2	PMID24510058	smaroy.aSep08	-	7:35266989-35322483	765	0.271835	0.371387	0.739563	0.519297	1.12901	0.842474	5	6	12	9	19	14
NONRATT026416.2	NONRATT026416.2	PMID24510058	Zfp347.aSep08-unspliced	-	7:9974310-10195137	2195	0.54944	0.668793	0.794749	0.100552	0.124266	0.083891	29	31	37	5	6	4
NONRATT004141.2	NONRATT004141.2	PMID24510058	bleymor.aSep08-unspliced	-	10:17292388-17293458	1071	21.1237	22.2845	10.1253	12.0756	15.28	10.5311	544	504	230	293	360	245
NONRATT025892.2	NONRATT025892.2	PMID24510058	Mtdh.fSep08-unspliced	-	7:72802037-72802678	642	1.81377	2.21285	2.57036	3.78145	2.33661	2.65316	28	30	35	55	33	37
NONRATT027684.2	NONRATT027684.2	PMID24510058	gopor.aSep08	-	8:55696890-55699178	662	0.753827	0.929941	1.06834	1.13348	0.686692	1.04313	12	13	15	17	10	15
NONRATT021710.2	NONRATT021710.2	PMID24510058	fazey.aSep08-unspliced	-	4:145683972-145685049	1078	6.51971	6.72102	10.8468	11.7515	11.8494	13.8364	169	153	248	287	281	324
NONRATT022553.2	NONRATT022553.2	-	-	-	5:136420354-136444246	793	3.09415	2.80666	4.57809	4.00764	4.07003	3.65736	59	47	77	72	71	63
NONRATT023150.2	NONRATT023150.2	PMID24510058	Ubap2.cSep08-unspliced	-	5:57540937-57541868	932	2.00797	0.711344	2.42823	3.50465	4.34096	2.51912	45	14	48	74	89	51
NONRATT030356.2	NONRATT030356.2	PMID24510058	Vapa.dSep08-unspliced	-	9:113330701-113331122	422	0.689857	1.2344	0.558606	0.523012	0.53856	0.654529	7	11	5	5	5	6
NONRATT007708.2	NONRATT007708.2	PMID24510058	serlo.aSep08	-	12:5772862-5822698	573	0.0725703	0	0.246823	0.231127	0.317324	0.160681	1	0	3	3	4	2
NONRATT026133.2	NONRATT026133.2	PMID24510058	Tnrc6b.bSep08-unspliced	-	7:122096200-122096788	589	0.423662	1.12559	2.88174	2.47303	1.38921	1.56317	6	14	36	33	18	20
NONRATT005767.2	NONRATT005767.2	PMID24510058	Lgals9.eSep08	-	10:64755099-64757592	1756	0.615759	0.647205	1.28879	1.2317	1.11315	0.970003	26	24	48	49	43	37
NONRATT016648.2	NONRATT016648.2	PMID24510058	zeeshee.aSep08	-	2:195923540-195927024	342	0.243174	0.138456	0.137799	0.258116	0.265896	0.134674	2	1	1	2	2	1
NONRATT008243.2	NONRATT008243.2	PMID24510058	sawkor.aSep08-unspliced	-	13:52564259-52564871	613	1.62823	3.09	4.61489	3.16827	3.41122	4.50597	24	40	60	44	46	60
NONRATT020049.2	NONRATT020049.2	PMID24510058	Eef1a2.bSep08	-	3:176657107-176664752	444	0.18731	0	0	0.0994596	0	0.207366	2	0	0	1	0	2
NONRATT011754.2	NONRATT011754.2	PMID24510058	wawgaw.aSep08-unspliced	-	16:7331424-7332203	780	1.33294	2.06418	2.53879	3.45194	1.92321	2.12476	25	34	42	61	33	36
NONRATT004155.2	NONRATT004155.2	PMID24510058	skermor.aSep08-unspliced	-	10:18920913-18921650	738	0.901632	0.449137	1.21382	0.478458	1.35511	0.81095	16	7	19	8	22	13
NONRATT030053.2	NONRATT030053.2	PMID24510058	Fam126b.dSep08-unspliced	-	9:65413111-65413420	310	1.20737	2.44412	2.43345	2.70529	2.05296	2.22759	9	16	16	19	14	15
NONRATT014650.2	NONRATT014650.2	PMID24510058	Nfat5.bSep08-unspliced	-	19:38455608-38458541	2934	1.53082	1.40417	1.89622	1.71504	2.1691	1.9927	108	87	118	114	140	127
NONRATT005777.2	NONRATT005777.2	PMID24510058	sleymee.bSep08	-	10:68141735-68142857	610	0.95449	0.931589	1.54586	1.15779	1.26688	0.754676	14	12	20	16	17	10
ENSRNOT00000087471	ENSRNOT00000087471	ensembl:lincRNA	-	LOC102549726	20:4871264-4873982	767	6.72337	6.23575	2.9506	4.31615	3.97093	3.24113	124	101	48	75	67	54
NONRATT026849.2	NONRATT026849.2	PMID24510058	Uqcrbl.bSep08	-	7:71265053-71269854	1060	4.35488	5.22688	7.47256	4.78877	4.71736	5.29848	111	117	168	115	110	122
MSTRG.23167.1	-	-	-	-	X:10620759-10627493	6616	1.79776	1.90391	2.21631	2.1216	2.09563	2.74157	286	266	311	318	305	394
NONRATT002145.2	NONRATT002145.2	PMID24510058	dafler.aSep08-unspliced	-	1:48188091-48188713	623	1.13481	0.91215	1.21087	0.991932	1.31339	1.10843	17	12	16	14	18	15
MSTRG.19809.1	-	-	-	-	7:68230099-68264455	2054	1.57927	1.7291	2.20361	1.78364	1.28362	2.33094	78	75	96	83	58	104
NONRATT016060.2	NONRATT016060.2	PMID24510058	Sfrs12.fSep08	-	2:33824189-33825573	244	2.72707	3.68743	3.86465	4.1608	5.21653	5.28273	16	19	20	23	28	28
NONRATT017026.2	NONRATT017026.2	PMID24510058	RGD1563989.aSep08-unspliced	-	20:3132467-3133413	947	0.351322	0.500069	0.29874	0.46608	0.384006	0.340306	8	10	6	10	8	7
NONRATT020799.2	NONRATT020799.2	PMID24510058	dorzey.aSep08-unspliced	-	4:145673446-145674523	1078	3.35631	4.12923	4.50488	5.2411	5.01809	4.27051	87	94	103	128	119	100
NONRATT025856.2	NONRATT025856.2	PMID24510058	stusaw.aSep08-unspliced	-	7:66802784-66803400	617	1.41543	0.844274	1.98677	1.64544	1.39982	2.16377	21	11	26	23	19	29
ENSRNOT00000078804	NONRATT033602.1	ensembl	-	AC112557.2	8:48564896-48567083	259	0.160551	0.548477	0.181959	0.170502	0.175464	0.355484	1	3	1	1	1	2
NONRATT016693.2	NONRATT016693.2	PMID24510058	cheeshee.aSep08	-	2:199347409-199354796	319	0.39106	0.593754	1.62583	0.691885	0.427529	0.865866	3	4	11	5	3	6
NONRATT011258.2	NONRATT011258.2	PMID24510058	geegaw.aSep08-unspliced	-	16:4468081-4468580	500	1.49714	1.51535	2.45167	2.38357	2.00014	1.84141	18	16	26	27	22	20
NONRATT017550.2	NONRATT017550.2	PMID24510058	C2.cSep08-unspliced	-	20:4543939-4544420	482	0.0862713	0.0982404	0.0977745	0.0916184	0.0942847	0.0955571	1	1	1	1	1	1
NONRATT003144.2	NONRATT003144.2	PMID24510058	Gtf3c1.gSep08	-	1:197032472-197053384	770	2.59243	7.56443	3.98007	7.85346	7.37956	8.42998	48	123	65	137	125	141
NONRATT016056.2	NONRATT016056.2	PMID24510058	jorshor.aSep08-unspliced	-	2:33451419-33451812	394	2.00546	2.64413	2.2736	2.01656	1.61527	2.10313	19	22	19	18	14	18
NONRATT024583.2	NONRATT024583.2	PMID24510058	sportu.aSep08	-	6:126988442-126989324	252	0.495033	0.563713	1.12265	0.875838	0.360859	0.365359	3	3	6	5	2	2
NONRATT014565.2	NONRATT014565.2	PMID24510058	Btbd14b.dSep08-unspliced	-	19:25783686-25784371	686	0.181849	0.138052	0.206166	0.257363	0.132561	0.0671407	3	2	3	4	2	1
NONRATT025270.2	NONRATT025270.2	PMID24510058	swoyva.aSep08-unspliced	-	6:123742971-123743972	1002	0.0829995	0.0945147	0.0941141	0.0440719	0.090755	0.183773	2	2	2	1	2	4
NONRATT020510.2	NONRATT020510.2	PMID24510058	Ppm1k.bSep08	-	4:88694661-88719286	1346	9.05277	7.10672	7.46107	20.2335	5.80891	6.7036	293	202	213	617	172	196
NONRATT002159.2	NONRATT002159.2	PMID24510058	PDEase_I.0.bSep08	-	1:52388561-52388973	413	0.503521	0.458614	0.11411	0.106925	0.110037	0.222931	5	4	1	1	1	2
NONRATT005804.2	NONRATT005804.2	PMID24510058	Usp32.bSep08-unspliced	-	10:72301795-72302636	842	0.691495	2.13713	2.57578	1.52026	2.32149	2.29635	14	38	46	29	43	42
NONRATT005522.2	NONRATT005522.2	-	-	-	10:48878849-48879629	781	0.159729	0.181889	0.422579	0.39563	0.232813	0.412637	3	3	7	7	4	7
NONRATT025550.2	NONRATT025550.2	PMID24510058	Mobkl2a.aSep08	-	7:11878937-11893637	1422	0.233968	0.333028	0.596816	0.372502	0.479509	0.356126	8	10	18	12	15	11
NONRATT017054.2	NONRATT017054.2	PMID24510058	wubor.aSep08	-	20:3464306-3464878	418	0.298441	0	0	0	0.108721	0.110188	3	0	0	0	1	1
NONRATT004998.2	NONRATT004998.2	-	-	-	10:95240819-95243234	621	0.133922	0.076251	0.151856	0.568603	0.0731807	0.148262	2	1	2	8	1	2
NONRATT019923.2	NONRATT019923.2	PMID24510058	plorsho.aSep08-unspliced	-	3:160043883-160044362	480	0.173261	0.591898	0.196463	0.183907	0.284129	0.383627	2	6	2	2	3	4
MSTRG.2104.1	-	-	-	-	1:217475101-217478171	3047	2.23836	2.76636	3.822	3.47672	3.29709	4.29085	164	178	247	240	221	284
NONRATT026196.2	NONRATT026196.2	PMID24510058	sneysoy.aSep08-unspliced	-	7:126590298-126590831	534	2.80363	3.10376	2.82536	3.05836	3.14969	3.87942	36	35	32	37	37	45
NONRATT000687.2	NONRATT000687.2	PMID24510058	Irf3.kSep08	-	1:100994854-100997199	419	0.0992429	1.35625	0.225065	0.105394	0.108461	0.439477	1	12	2	1	1	4
NONRATT017203.2	NONRATT017203.2	PMID24510058	Snrpc.bSep08	-	20:7417058-7427581	769	0.162221	0.123152	0.797063	0.631389	0.0590965	0.119727	3	2	13	11	1	2
NONRATT005473.2	NONRATT005473.2	PMID24510058	woymee.aSep08	-	10:45546184-45552962	519	0.240363	0.456184	0.454204	0.170088	0.262778	0.266144	3	5	5	2	3	3
ENSRNOT00000089619	ENSRNOT00000089619	ensembl:lincRNA	-	AABR07044962.1	20:28365988-28375791	1933	0.021512	0.0244966	0.0243804	0	0.0235102	0.0238275	1	1	1	0	1	1
NONRATT001742.2	NONRATT001742.2	PMID24510058	Zfyve27.cSep08-unspliced	-	1:261434058-261435821	1764	0.235753	0.510052	0.481107	0.350325	0.231942	0.443663	10	19	18	14	9	17
NONRATT019580.2	NONRATT019580.2	PMID24510058	spoychor.aSep08-unspliced	-	3:107572805-107573696	892	0.979056	0.477818	1.58569	0.989687	0.662525	1.08381	21	9	30	20	13	21
NONRATT000804.2	NONRATT000804.2	PMID24510058	gloyglo.aSep08-unspliced	-	1:135148585-135148933	349	0.119148	0.135679	0.270207	0.252939	0.911773	0.131973	1	1	2	2	7	1
NONRATT026304.2	NONRATT026304.2	PMID24510058	Slc4a8.eSep08-unspliced	-	7:142447731-142448218	488	0.340842	0.873388	0.579727	0.452277	0.465722	0.566007	4	9	6	5	5	6
NONRATT025189.2	NONRATT025189.2	PMID24510058	Actn1.cSep08	-	6:103376673-103379531	1635	1.0683	1.85364	1.41302	1.53882	2.16865	1.49229	42	64	49	57	78	53
NONRATT004813.2	NONRATT004813.2	PMID24510058	Cbx1.dSep08	-	10:84675706-84677485	381	1.09152	0.869982	0.866231	0.810989	0.477236	0.604198	10	7	7	7	4	5
NONRATT019816.2	NONRATT019816.2	PMID24510058	bleyshu.aSep08-unspliced	-	3:149041625-149042296	672	0.185637	0.140928	0.631453	0.0657144	0.270576	0.205549	3	2	9	1	4	3
NONRATT001970.2	NONRATT001970.2	PMID24510058	RGD1309903.aSep08-unspliced	-	1:13839014-13839780	767	0.704845	0.926108	1.72117	0.805702	0.829749	1.08036	13	15	28	14	14	18
NONRATT019183.2	NONRATT019183.2	PMID24510058	RGD1561113.aSep08	-	3:11408077-11410831	2220	0.393387	1.08788	0.594656	0.596477	0.491445	0.456205	21	51	28	30	24	22
NONRATT024060.2	NONRATT024060.2	PMID24510058	Ypel5.gSep08-unspliced	-	6:24082372-24083328	957	3.56337	3.26584	3.94133	4.93516	4.13254	4.52184	82	66	80	107	87	94
NONRATT019092.2	NONRATT019092.2	PMID24510058	smeycha.aSep08	-	3:3881453-3884178	529	0.707533	0.358048	0.35653	0.417224	0.25781	0.609206	9	4	4	5	3	7
NONRATT013243.2	NONRATT013243.2	PMID24510058	glerfa.aSep08-unspliced	-	18:13760612-13761196	585	0.710885	0.323773	0.725362	0.150898	0.466262	0.786927	10	4	9	2	6	10
NONRATT014760.2	NONRATT014760.2	PMID24510058	godor.aSep08-unspliced	-	19:51850667-51851326	660	0	0.0717453	0.071405	0	0	0.139501	0	1	1	0	0	2
NONRATT017772.2	NONRATT017772.2	PMID24510058	RGD1311294.eSep08	-	20:34935264-34937923	1258	0.165305	0.0752812	0.412272	0.456132	0.216823	0.439128	5	2	11	13	6	12
NONRATT029216.2	NONRATT029216.2	PMID24510058	Vegfa.oSep08	-	9:17347881-17354193	793	10.4361	15.5261	16.5287	19.0364	14.2737	13.8166	199	260	278	342	249	238
NONRATT009942.2	NONRATT009942.2	PMID24510058	Gnpda2.fSep08	-	14:62630911-62646048	725	0.229422	0.195939	0.130072	0.243519	0.12543	0.190523	4	3	2	4	2	3
NONRATT017120.2	NONRATT017120.2	PMID24510058	Ddah2.cSep08	-	20:5051656-5052570	514	0.0809003	0.0921243	0.0916874	0.171742	0.176919	0.268733	1	1	1	2	2	3
NONRATT012993.2	NONRATT012993.2	PMID24510058	Svil.aSep08	-	17:55300565-55425874	677	4.1157	4.82639	5.98931	4.82471	5.70746	5.10002	67	69	86	74	85	75
NONRATT015058.2	NONRATT015058.2	PMID24510058	flashoy.aSep08-unspliced	-	2:54900804-54901208	405	0.410694	0.350755	0.349209	1.08982	0.561166	0.341059	4	3	3	10	5	3
NONRATT030121.2	NONRATT030121.2	-	-	-	9:73334909-73444452	804	0.568968	0.471163	0.234583	0.439182	0.282677	0.0572867	11	8	4	8	5	1
NONRATT003031.2	NONRATT003031.2	PMID24510058	Hpx.dSep08	-	1:170424035-170424992	877	0.331949	0.053993	0.268793	0.201313	0.10369	0.472452	7	1	5	4	2	9
NONRATT023420.2	NONRATT023420.2	PMID24510058	sworvo.aSep08	-	5:122094782-122098683	505	0.247026	0.375064	0.653533	0.437052	0.450044	0.729271	3	4	7	5	5	8
NONRATT020237.2	NONRATT020237.2	PMID24510058	RGD1563612.dSep08	-	4:34282652-34283316	357	0.698983	0.79583	1.18862	0.865509	1.14606	1.0316	6	6	9	7	9	8
NONRATT028353.2	NONRATT028353.2	PMID24510058	LOC503192.aSep08-unspliced	-	8:23275331-23278375	3045	6.80145	7.16929	7.66452	6.6536	6.76272	7.49881	498	461	495	459	453	496
MSTRG.19939.1	-	-	-	-	7:76893839-76901782	2938	1.69859	2.11146	2.92069	2.08831	2.41369	2.41306	120	131	182	139	156	154
NONRATT018041.2	NONRATT018041.2	PMID24510058	Golga2.cSep08	-	3:11333133-11334910	806	0.206366	0	0.234001	0.219046	0.338416	0	4	0	4	4	6	0
NONRATT013388.2	NONRATT013388.2	PMID24510058	bludoy.bSep08	-	18:31448518-31449720	225	2.40274	1.68362	3.1433	1.37327	2.22238	2.45521	13	8	15	7	11	12
NONRATT008580.2	NONRATT008580.2	-	-	-	13:110522779-110524750	1659	0.802175	0.399622	1.39258	0.425708	0.712416	0.416246	32	14	49	16	26	15
NONRATT010789.2	NONRATT010789.2	PMID24510058	sweeflu.aSep08	-	15:19608941-19609382	442	0.0940786	0	0	0.0999097	0	0.104205	1	0	0	1	0	1
NONRATT012983.2	NONRATT012983.2	PMID24510058	Gli3.aSep08	-	17:52477332-52555110	404	0.102928	0.703246	0.233422	0.218504	0.337578	0.455794	1	6	2	2	3	4
NONRATT006131.2	NONRATT006131.2	-	-	-	10:91738060-91748081	611	22.5293	18.7558	16.8221	14.5929	16.0703	14.5417	331	242	218	202	216	193
NONRATT021314.2	NONRATT021314.2	PMID24510058	Chchd3.fSep08-unspliced	-	4:60347963-60348435	473	0.703387	0.600658	1.39549	1.67976	0.576667	0.583956	8	6	14	18	6	6
NONRATT029659.2	NONRATT029659.2	PMID24510058	flarpee.aSep08-unspliced	-	9:98152122-98152534	413	0.201369	0.114653	0.11411	0.213742	0.330222	0.334453	2	1	1	2	3	3
NONRATT028731.2	NONRATT028731.2	PMID24510058	RGD1560796.cSep08	-	8:78901063-78910496	544	0.840902	0.696351	0.95338	0.567991	0.584942	0.507741	11	8	11	7	7	6
NONRATT002794.2	NONRATT002794.2	PMID24510058	doyglar.aSep08-unspliced	-	1:140996703-140997307	605	0.618653	0.62614	0.233768	0.29182	0.150308	0.60873	9	8	3	4	2	8
NONRATT008029.2	NONRATT008029.2	PMID24510058	RGD1562310.bSep08	-	12:43924475-43930669	743	0.559714	1.46587	2.0941	0.772293	0.795386	1.48701	10	23	33	13	13	24
ENSRNOT00000076224	NONRATT031046.2	ensembl	-	Rn60_X_0714.1	X:70439998-70446732	355	0.820055	1.33399	0.796921	0.621722	1.15252	1.55612	7	10	6	5	9	12
NONRATT017376.2	NONRATT017376.2	PMID24510058	Dnajb12.eSep08-unspliced	-	20:29458428-29459183	756	1.04518	2.44288	3.36775	1.75156	2.22478	1.64415	19	39	54	30	37	27
NONRATT031517.1	NONRATT031517.1	ensembl	-	-	1:88095240-88098785	1345	2.99923	2.04204	3.4003	3.24895	5.8808	1.57447	97	58	97	99	174	46
NONRATT004249.2	NONRATT004249.2	PMID24510058	Skp1a.fSep08	-	10:37606170-37608855	736	7.91058	8.10688	5.89357	10.5552	6.42342	10.258	140	126	92	176	104	164
NONRATT030811.2	NONRATT030811.2	PMID24510058	bysaw.aSep08-unspliced	-	X:142298322-142672228	360	0.346523	0.131533	0.39286	0	0.126237	0.12794	3	1	3	0	1	1
NONRATT012119.2	NONRATT012119.2	PMID24510058	wargoy.aSep08-unspliced	-	16:80600785-80601649	865	1.7308	0.985411	0.545045	1.27574	1.10361	1.0644	36	18	10	25	21	20
NONRATT022746.2	NONRATT022746.2	PMID24510058	Hmgcl.bSep08	-	5:154304684-154306263	673	0.679719	0.985101	0.910759	0.590286	0.945642	1.02608	11	14	13	9	14	15
MSTRG.8236.1	-	-	-	-	15:59144473-59148449	3953	2.19877	3.70164	0.417448	1.5521	1.49495	1.78181	209	309	35	139	130	153
NONRATT012848.2	NONRATT012848.2	PMID24510058	Kif13a.fSep08-unspliced	-	17:18320150-18320894	745	1.28392	1.39837	1.58216	1.95519	1.46444	1.73018	23	22	25	33	24	28
NONRATT017979.2	NONRATT017979.2	PMID24510058	Odf2.mSep08	-	3:8487247-8494747	638	0.391123	0.445315	0.221676	0.622668	0.356226	0.649436	6	6	3	9	5	9
NONRATT022010.2	NONRATT022010.2	PMID24510058	Stau2.aSep08	-	5:2400159-2497916	1526	11.5005	10.0543	8.18762	10.847	9.35377	9.32185	422	324	265	375	314	309
NONRATT017249.2	NONRATT017249.2	PMID24510058	shorda.aSep08-unspliced	-	20:10356800-10358928	2129	0.175803	0.533815	0.398625	0.456118	0.533797	0.627076	9	24	18	22	25	29
ENSRNOT00000085702	NONRATT033542.1	ensembl	-	AABR07057421.2	7:70256026-70272101	736	0.282546	0.257347	0.384384	0.539759	0.185301	0.375287	5	4	6	9	3	6
NONRATT013793.2	NONRATT013793.2	PMID24510058	warfu.aSep08-unspliced	-	18:36194139-36196279	2141	0.135974	0.0884668	0.176184	0.0618569	0.233552	0.193526	7	4	8	3	11	9
NONRATT002854.2	NONRATT002854.2	PMID24510058	Zfand6andFah.qSep08	-	1:146731460-146736328	625	2.79468	2.50033	3.92275	4.94365	1.74561	2.50439	42	33	52	70	24	34
NONRATT011541.2	NONRATT011541.2	PMID24510058	Dlc1.cSep08-unspliced	-	16:59236443-59236915	473	0.967126	1.40163	1.49523	1.02651	1.7299	1.36256	11	14	15	11	18	14
NONRATT023644.2	NONRATT023644.2	-	-	-	5:147890624-147892135	1512	4.01569	5.04238	5.73762	5.8678	5.02084	5.60226	146	161	184	201	167	184
NONRATT010133.2	NONRATT010133.2	PMID24510058	Hus1andRGD1566034.cSep08	-	14:89197557-89201117	599	0.208261	0.237155	0.314866	0.368466	0.303551	0.230599	3	3	4	5	4	3
NONRATT025019.2	NONRATT025019.2	PMID24510058	kawtey.aSep08-unspliced	-	6:75964758-75965079	322	0.258278	0.441167	0.732087	0.411291	0.141134	0.428972	2	3	5	3	1	3
NONRATT013586.2	NONRATT013586.2	PMID24510058	shorfaw.aSep08-unspliced	-	18:72616362-72618185	1824	4.104	5.06257	4.39431	5.68687	6.03116	5.42639	180	195	170	235	242	215
NONRATT023688.2	NONRATT023688.2	PMID24510058	peevar.cSep08	-	5:151832356-151835363	474	5.52742	5.29491	2.3873	2.23492	2.97303	2.03958	63	53	24	24	31	21
NONRATT002862.2	NONRATT002862.2	PMID24510058	Zfand6andFah.jSep08	-	1:146748696-146823762	705	0.0589826	0.47016	2.87572	2.00348	0.644809	2.08961	1	7	43	32	10	32
NONRATT004880.2	NONRATT004880.2	PMID24510058	glornee.aSep08-unspliced	-	10:88532847-88533316	470	0.088474	0.302246	0.300914	0.281778	0.0966919	0.587684	1	3	3	3	1	6
NONRATT023548.2	NONRATT023548.2	PMID24510058	jeevar.aSep08	-	5:138349496-138352923	763	10.7375	0.744783	0.494376	4.57017	8.04306	3.86147	197	12	8	79	135	64
NONRATT021846.2	NONRATT021846.2	PMID24510058	Cd4.bSep08	-	4:157399553-157400328	648	0.385088	0.292296	0.363784	0.613059	0.631397	0.639414	6	4	5	9	9	9
NONRATT009910.2	NONRATT009910.2	PMID24510058	Pgm2.cSep08-unspliced	-	14:45829448-45829851	404	0.308783	0.234415	0.466843	0.437008	0.112488	0.227897	3	2	4	4	1	2
NONRATT004972.2	NONRATT004972.2	PMID24510058	blerner.aSep08-unspliced	-	10:93815815-93816648	834	1.34635	1.30592	2.09169	2.32872	1.52618	2.09758	27	23	37	44	28	38
NONRATT025289.2	NONRATT025289.2	-	-	-	6:125787378-125787651	274	1.366	1.20972	1.89284	2.25538	2.15683	1.84821	9	7	11	14	13	11
NONRATT014905.2	NONRATT014905.2	PMID24510058	plorsher.aSep08-unspliced	-	2:16969710-16970034	325	0.127947	0	0.145007	0.135877	0	0	1	0	1	1	0	0
NONRATT009426.2	NONRATT009426.2	PMID24510058	Rab5a.dSep08	-	14:72889040-72890880	1566	0.478014	0.423354	1.77634	0.31005	1.71265	0.764314	18	14	59	11	59	26
NONRATT003294.2	NONRATT003294.2	PMID24510058	luflu.aSep08	-	1:208004492-208005049	558	0.0745211	0.08486	0.338001	0.0791399	0.081443	0.165001	1	1	4	1	1	2
NONRATT017180.2	NONRATT017180.2	-	-	-	20:6877771-6898974	700	0.297077	0.0676455	0.606195	0.252216	0.389662	0.328856	5	1	9	4	6	5
NONRATT001637.2	NONRATT001637.2	PMID24510058	Smarca2.gSep08	-	1:244718781-244728141	459	0.0905942	0.103163	0.205452	0.192322	0.297128	0.401178	1	1	2	2	3	4
NONRATT009401.2	NONRATT009401.2	PMID24510058	Ppargc1a.cSep08-unspliced	-	14:63148828-63149208	381	2.6197	2.73435	2.72251	4.40243	3.22149	2.6582	24	22	22	38	27	22
NONRATT027485.2	NONRATT027485.2	PMID24510058	slarpey.aSep08	-	8:22052020-22052779	227	0.183184	0.417197	0.207609	0.194538	0.200199	0.202901	1	2	1	1	1	1
NONRATT010483.2	NONRATT010483.2	PMID24510058	sterjo.aSep08-unspliced	-	15:38075657-38076159	503	2.81108	1.88287	3.7494	2.72035	3.43424	3.02025	34	20	40	31	38	33
NONRATT026152.2	NONRATT026152.2	PMID24510058	Zc3h7b.cSep08	-	7:123022837-123023489	394	0.738882	0.961459	0.83765	1.23233	0.576833	1.28531	7	8	7	11	5	11
NONRATT003853.2	NONRATT003853.2	PMID24510058	puflo.bSep08-unspliced	-	1:265756302-265757170	869	0.430708	0.435921	0.488304	0.253983	0.313882	0.423799	9	8	9	5	6	8
NONRATT004944.2	NONRATT004944.2	PMID24510058	gomer.aSep08	-	10:90932054-90932929	780	0.159934	0.607135	0.1209	0.226348	0.174848	0.0590494	3	10	2	4	3	1
NONRATT002319.2	NONRATT002319.2	-	-	-	1:75345565-75347352	714	0.582448	1.79075	0.924466	0.865509	1.40066	1.8053	10	27	14	14	22	28
NONRATT014866.2	NONRATT014866.2	PMID24510058	klershaw.aSep08-unspliced	-	2:2551303-2552296	994	0.0836675	0.142913	0.0948715	0.222044	0.365849	0.416841	2	3	2	5	8	9
MSTRG.4029.1	-	-	-	-	10:82019100-82025302	6073	1.56132	2.16772	2.48435	1.91154	2.23061	2.33477	228	278	320	263	298	308
NONRATT021273.2	NONRATT021273.2	PMID24510058	LOC500054.dSep08	-	4:51889242-51892678	881	0.613639	0.806271	0.642186	1.05212	0.670797	0.836054	13	15	12	21	13	16
ENSRNOT00000090507	ENSRNOT00000090507	ensembl:lincRNA	-	AABR07051250.2	3:3489107-3492223	187	0.444735	0	0	0.23615	0.243023	0.246302	2	0	0	1	1	1
NONRATT016988.2	NONRATT016988.2	PMID24510058	Zranb2.dSep08	-	2:263864355-263872547	1770	5.19252	5.35078	6.60611	4.61349	5.49607	6.94441	221	200	248	185	214	267
NONRATT019329.2	NONRATT019329.2	PMID24510058	snarber.aSep08-unspliced	-	X:112120721-112121979	1259	0.396373	0.112832	1.08603	0.105191	0.61382	0.14626	12	3	29	3	17	4
NONRATT013368.2	NONRATT013368.2	PMID24510058	Tmco6.bSep08-unspliced	-	18:29583194-29583561	368	0.904082	1.67288	1.53741	1.91916	1.6059	1.12592	8	13	12	16	13	9
NONRATT000183.2	NONRATT000183.2	PMID24510058	geyfler.aSep08-unspliced	-	1:49042217-49042565	349	0.476593	0.271357	0.405242	0.379472	0.390779	0.263812	4	2	3	3	3	2
NONRATT006397.2	NONRATT006397.2	PMID24510058	LOC680375.aSep08-unspliced	-	11:8268819-8270330	1512	0.990172	0.595061	0.59246	1.05096	0.420911	0.608931	36	19	19	36	14	20
NONRATT001174.2	NONRATT001174.2	PMID24510058	kloflu.aSep08	-	1:193114029-193121099	383	1.08582	1.731	1.35415	2.18966	0.712176	1.32222	10	14	11	19	6	11
NONRATT028196.2	NONRATT028196.2	-	-	-	8:130099981-130100716	736	4.23781	4.31082	3.84365	4.01819	5.37342	4.7537	75	67	60	67	87	76
NONRATT026841.2	NONRATT026841.2	PMID24510058	Ldl_recept_a.5.aSep08-unspliced	-	7:70866896-70867281	386	0.107727	0.122673	0.122091	0.114404	0.117734	0.119323	1	1	1	1	1	1
NONRATT021250.2	NONRATT021250.2	PMID24510058	klawwer.bSep08-unspliced	-	4:40419071-40420716	1646	0.960089	0.776789	1.00253	1.52853	0.607577	1.06281	38	27	35	57	22	38
MSTRG.6105.2	-	-	-	-	13:25613847-25615867	1976	2.88332	2.61216	5.72652	4.51226	3.6348	3.19177	137	109	240	202	158	137
NONRATT023972.2	NONRATT023972.2	PMID24510058	RGD1311578.dSep08	-	6:1543820-1544852	635	0.458456	0.22371	0.89097	0.764627	0.572683	0.652504	7	3	12	11	8	9
MSTRG.1258.1	-	-	-	-	1:131987806-131992288	1068	1.51862	1.77357	7.41659	3.88495	2.76664	4.05188	39	40	168	94	65	94
NONRATT001087.2	NONRATT001087.2	PMID24510058	RGD1306959.iSep08-unspliced	-	1:174338149-174338679	526	0.553459	0.0900226	0.268878	0.419603	0.172883	0.262603	7	1	3	5	2	3
NONRATT017116.2	NONRATT017116.2	PMID24510058	G7c.bSep08	-	20:5008552-5013657	663	0.376375	0.357103	0.284471	0.0666064	0.274249	0.277739	6	5	4	1	4	4
NONRATT001196.2	NONRATT001196.2	PMID24510058	Tufm.dSep08-unspliced	-	1:197905325-197905722	398	1.04489	0.475898	0.473881	0.776349	0.799519	0.809723	10	4	4	7	7	7
NONRATT022550.2	NONRATT022550.2	PMID24510058	Prnpip1.aSep08	-	5:136406081-136447779	986	0.590506	0.816459	1.05201	1.02965	1.06036	0.420223	14	17	22	23	23	9
NONRATT031185.2	NONRATT031185.2	PMID24510058	Chrdl1.bSep08	-	X:114568266-114594179	1115	0.149176	0.0849361	0.253728	0.0791709	0.774609	0	4	2	6	2	19	0
NONRATT022656.2	NONRATT022656.2	PMID24510058	Sync.cSep08-unspliced	-	5:147495434-147495842	409	0.101669	0	0.115226	0.107971	0.111113	0.112613	1	0	1	1	1	1
NONRATT008452.2	NONRATT008452.2	PMID24510058	wukee.aSep08	-	13:89806273-89807353	373	1.44937	1.01559	0.758464	0.946655	1.46241	1.60451	13	8	6	8	12	13
NONRATT000193.2	NONRATT000193.2	PMID24510058	swyflee.aSep08-unspliced	-	1:48122085-48124075	1991	4.76237	4.9947	6.51219	4.34526	4.97733	5.1331	228	210	275	196	218	222
NONRATT020418.2	NONRATT020418.2	PMID24510058	SH3_2.4.cSep08-unspliced	-	4:72734766-72735475	710	1.52292	1.33392	1.52733	1.86504	1.72872	1.55612	26	20	23	30	27	24
NONRATT011114.2	NONRATT011114.2	PMID24510058	steyjaw.aSep08-unspliced	-	15:60799577-60801322	1746	10.0753	10.4147	6.45388	7.63473	8.40948	6.3807	423	384	239	302	323	242
NONRATT011077.2	NONRATT011077.2	PMID24510058	verjaw.aSep08-unspliced	-	15:54903565-54904287	723	0.287627	0.392962	0.195615	0.427368	0.125777	0.44574	5	6	3	7	2	7
NONRATT027389.2	NONRATT027389.2	PMID24510058	wozer.aSep08-unspliced	-	8:997476-1076076	578	0.0719425	0	0	0.0764015	0.0786249	0.079686	1	0	0	1	1	1
NONRATT010979.2	NONRATT010979.2	PMID24510058	chuja.aSep08	-	15:40677178-40684524	573	0.0725703	0.165277	0	0.0770682	0.079311	0.160681	1	2	0	1	1	2
NONRATT001097.2	NONRATT001097.2	PMID24510058	Ampd3.cSep08-unspliced	-	1:175628381-175628989	609	0.478029	1.47739	1.31617	0.362416	1.11964	0.982727	7	19	17	5	15	13
NONRATT008933.2	NONRATT008933.2	PMID24510058	swerla.aSep08-unspliced	-	13:88288691-88289682	992	2.47345	3.43702	2.1863	0.978907	2.61201	1.39224	59	72	46	22	57	30
NONRATT008334.2	NONRATT008334.2	PMID24510058	blykoy.aSep08-unspliced	-	13:72853444-72854861	1418	1.31976	1.10205	1.92851	1.33853	1.28231	1.62328	45	33	58	43	40	50
NONRATT016690.2	NONRATT016690.2	PMID24510058	flawbler.aSep08-unspliced	-	2:198997112-198998859	1748	7.85112	7.85631	5.12482	7.24722	7.82773	6.18906	330	290	190	287	301	235
NONRATT021862.2	NONRATT021862.2	PMID24510058	zeyzor.aSep08-unspliced	-	4:157885412-157885685	274	0.303524	0.172817	0.344169	0.644347	0.497743	0.840144	2	1	2	4	3	5
MSTRG.13384.1	-	-	-	-	20:37927582-37944350	6362	2.13754	3.00711	2.31962	1.79696	1.74344	1.11436	327	404	313	259	244	154
NONRATT009451.2	NONRATT009451.2	PMID24510058	foyko.aSep08-unspliced	-	14:80248140-80248520	381	0.327423	0.124283	0.247513	0.115906	0.119279	0.120889	3	1	2	1	1	1
NONRATT028160.2	NONRATT028160.2	PMID24510058	Wdr48.bSep08	-	8:128602212-128610287	2356	0.847272	0.341693	0.520303	0.674469	0.405189	0.703444	48	17	26	36	21	36
MSTRG.16472.1	-	-	-	-	4:178654546-178662710	5351	1.97405	2.46906	2.34377	2.31794	2.59105	2.55517	254	279	266	281	305	297
NONRATT028573.2	NONRATT028573.2	PMID24510058	marro.aSep08-unspliced	-	8:58199985-58201552	1568	12.943	12.5333	10.6445	10.2468	11.2196	11.0393	488	415	354	364	387	376
ENSRNOT00000092217	NONRATT033478.1	ensembl	-	AC091481.2	7:107864977-107866426	353	1.29589	2.41468	1.73638	1.37546	1.67414	1.95624	11	18	13	11	13	15
NONRATT028259.2	NONRATT028259.2	PMID24510058	Cep57.bSep08	-	8:12338381-12347385	706	0	0.603702	0	0	0	0	0	9	0	0	0	0
NONRATT008482.2	NONRATT008482.2	PMID24510058	zykee.aSep08	-	13:91961789-91963082	658	0.126391	0.143927	0.143317	0.335427	0.207267	0.0699977	2	2	2	5	3	1
NONRATT006480.2	NONRATT006480.2	PMID24510058	Ttc3.eSep08	-	11:34598300-34639826	425	0.587145	0.668497	0.221888	0.727028	0.213968	1.40819	6	6	2	7	2	13
ENSRNOT00000076190	NONRATT031027.2	ensembl	-	Arhgef9	X:64248278-64250792	2515	0.942528	1.43099	1.63097	1.59711	0.921809	1.29963	57	76	87	91	51	71
NONRATT021282.2	NONRATT021282.2	PMID24510058	smorza.aSep08-unspliced	-	4:55708556-55709869	1314	0.348136	0.180182	0.322935	0.369511	0.41513	0.280275	11	5	9	11	12	8
NONRATT016239.2	NONRATT016239.2	PMID24510058	LOC685418.aSep08-unspliced	-	2:95101463-95101985	523	0.0795081	0.181078	0.0901096	0	0.0868933	0	1	2	1	0	1	0
NONRATT028540.2	NONRATT028540.2	PMID24510058	Bco2.bSep08	-	8:54973666-54975309	682	0.121944	0.208293	0.0691016	0.129436	0.133338	0.202535	2	3	1	2	2	3
NONRATT018564.2	NONRATT018564.2	PMID24510058	Usp8.dSep08-unspliced	-	3:119215070-119215849	780	3.89213	3.3998	3.98947	3.56512	4.0796	4.60358	73	56	66	63	70	78
NONRATT013200.2	NONRATT013200.2	PMID24510058	swudoy.aSep08-unspliced	-	18:879148-879544	397	0.104742	0.119274	0	0.111234	0.114472	0	1	1	0	1	1	0
NONRATT017094.2	NONRATT017094.2	PMID24510058	Prrt1.aSep08	-	20:4392626-4396271	2544	0	0	0.0555934	0.0173585	0.0178637	0.0181048	0	0	3	1	1	1
NONRATT005258.2	NONRATT005258.2	PMID24510058	Tsc2.eSep08-unspliced	-	10:13971914-13972463	550	1.36104	1.20541	1.7145	1.44459	1.07449	1.33921	18	14	20	18	13	16
NONRATT001653.2	NONRATT001653.2	PMID24510058	Cdc37l1.dSep08-unspliced	-	1:247136728-247139120	2393	7.66401	8.07381	4.43308	6.34522	5.90784	5.88676	441	408	225	344	311	306
NONRATT020827.2	NONRATT020827.2	PMID24510058	sawzey.aSep08-unspliced	-	4:148361747-148362205	459	0.724842	0.412652	1.95163	1.15403	0.792274	1.30388	8	4	19	12	8	13
NONRATT006713.2	NONRATT006713.2	PMID24510058	nuloy.aSep08	-	11:83613298-83613756	295	0.281917	0.160515	0.799091	0.598479	0.308259	0.156131	2	1	5	4	2	1
NONRATT028611.2	NONRATT028611.2	-	-	-	8:61833340-61836790	1245	5.17752	6.39003	3.55981	4.92807	2.84798	3.84559	155	168	94	139	78	104
NONRATT015256.2	NONRATT015256.2	PMID24510058	pyblo.aSep08-unspliced	-	2:127827140-127827798	659	0.252399	0.215562	0.0715134	0.334918	0.413905	0.489029	4	3	1	5	6	7
NONRATT021975.2	NONRATT021975.2	PMID24510058	marcha.aSep08-unspliced	-	4:179651401-179651855	455	0.274172	0	0	0	0	0	3	0	0	0	0	0
NONRATT017304.2	NONRATT017304.2	PMID24510058	Gstt3.cSep08-unspliced	-	20:13819645-13820448	804	16.3452	24.5019	24.4538	38.4303	37.3163	33.3819	316	416	417	700	660	583
NONRATT013735.2	NONRATT013735.2	PMID24510058	Cdc23.eSep08-unspliced	-	18:27430926-27432352	1427	1.48631	2.22338	2.87448	2.72201	2.83516	2.64536	51	67	87	88	89	82
NONRATT022664.2	NONRATT022664.2	PMID24510058	Collagen.16.aSep08	-	5:148268322-148271819	572	0.654344	0.331132	0.576983	0.308656	0.635758	0.965774	9	4	7	4	8	12
NONRATT002550.2	NONRATT002550.2	PMID24510058	LOC689340.aSep08	-	1:90422882-90460026	582	0	0	0.162031	0.0758764	0.0780845	0.0791383	0	0	2	1	1	1
NONRATT022623.2	NONRATT022623.2	PMID24510058	zawo.aSep08-unspliced	-	5:144164514-144165367	854	2.14267	1.66352	4.36151	3.15283	2.66148	2.80314	44	30	79	61	50	52
NONRATT001547.2	NONRATT001547.2	PMID24510058	storkla.aSep08-unspliced	-	1:226495378-226496373	996	0.584577	0.570551	0.804765	0.487488	0.775903	0.554641	14	12	17	11	17	12
NONRATT018769.2	NONRATT018769.2	PMID24510058	flushu.aSep08-unspliced	-	3:149137436-149137750	315	0.132009	0.150323	0.14961	0.28024	0.288687	0.292287	1	1	1	2	2	2
NONRATT018240.2	NONRATT018240.2	PMID24510058	Dync1i2.gSep08	-	3:57817774-57840152	503	1.81889	1.78873	2.06218	0.526495	1.53638	2.01347	22	19	22	6	17	22
NONRATT000684.2	NONRATT000684.2	PMID24510058	Irf3.eSep08	-	1:100992239-100995693	1491	2.92869	4.92284	2.81435	4.41101	5.00009	1.9452	105	155	89	149	164	63
NONRATT003111.2	NONRATT003111.2	-	-	-	1:190564292-190564869	578	0	0	0.0815351	0.152726	0	0.079686	0	0	1	2	0	1
NONRATT026303.2	NONRATT026303.2	PMID24510058	bloysa.aSep08	-	7:142340781-142345596	340	0.122302	0.13927	0.13861	0.129883	0.133662	0.135466	1	1	1	1	1	1
NONRATT007735.2	NONRATT007735.2	PMID24510058	Rpl21.cSep08	-	12:9996610-10000152	1017	5.72487	0.232802	1.159	2.99475	3.08416	0.316883	140	5	25	69	69	7
NONRATT012768.2	NONRATT012768.2	PMID24510058	Mito_carr.0.aSep08	-	17:8570460-8576202	264	0.945215	0.538089	0.714411	1.00313	0.344456	2.26697	6	3	4	6	2	13
NONRATT026216.2	NONRATT026216.2	PMID24510058	Pim3.aSep08	-	7:129862034-129863445	1337	12.473	35.5248	12.8715	11.5549	11.968	33.847	401	1003	365	350	352	983
NONRATT020904.2	NONRATT020904.2	PMID24510058	Ing4.iSep08	-	4:157561851-157563012	1039	1.2408	0.729236	1.13446	2.03918	1.31254	2.30402	31	16	25	48	30	52
NONRATT020458.2	NONRATT020458.2	PMID24510058	LOC500118.dSep08	-	4:79036732-79043474	752	0.0552962	0.377808	0.564277	0.410887	0.181359	0.795852	1	6	9	7	3	13
NONRATT022205.2	NONRATT022205.2	PMID24510058	RGD1559864.bSep08	-	5:58382025-58383229	563	0.0738593	0	0.1675	0	0	0.245344	1	0	2	0	0	3
NONRATT001767.2	NONRATT001767.2	PMID24510058	morflo.bSep08-unspliced	-	1:264751535-264752932	1398	0.148751	0.406487	0.337242	0.947195	0.422727	0.559815	5	12	10	30	13	17
NONRATT030313.2	NONRATT030313.2	PMID24510058	Stk25.dSep08-unspliced	-	9:100773730-100774129	400	0.727799	1.42067	1.76811	0.882756	1.3637	1.15088	7	12	15	8	12	10
NONRATT008996.2	NONRATT008996.2	PMID24510058	zerly.aSep08-unspliced	-	13:91862641-91863156	516	0.0805867	0.0917672	0.091332	0.0855815	0.0880721	0.178431	1	1	1	1	1	2
NONRATT025027.2	NONRATT025027.2	PMID24510058	neytey.aSep08-unspliced	-	6:76603275-76603727	453	0.45906	0.313589	0.624519	0.68209	0.90319	0.508166	5	3	6	7	9	5
NONRATT009496.2	NONRATT009496.2	-	-	-	14:82376004-82405684	726	1.08836	0	0	0	0	0	19	0	0	0	0	0
ENSRNOT00000086268	ENSRNOT00000086268	ensembl:lincRNA	-	AABR07028998.1	10:1771460-1783495	1481	4.07167	3.74105	2.92888	3.48708	3.59123	3.07735	145	117	92	117	117	99
NONRATT007060.2	NONRATT007060.2	PMID24510058	Osbpl11.bSep08-unspliced	-	11:70770506-70772435	1930	0.689538	1.64392	1.58791	1.89823	1.41321	1.6697	32	67	65	83	60	70
NONRATT024453.2	NONRATT024453.2	-	-	-	6:104611050-104613234	758	1.20699	1.37439	1.86601	1.68874	1.6792	2.49006	22	22	30	29	28	41
NONRATT016223.2	NONRATT016223.2	PMID24510058	Lrrcc1.aSep08	-	2:88390912-88402767	988	0.294655	0.239635	0.143147	0.446739	0.184035	0.652321	7	5	3	10	4	14
NONRATT010884.2	NONRATT010884.2	PMID24510058	Jph4.bSep08	-	15:33772354-33776300	2573	0.0161612	0	0.0183161	0.0171629	0	0	1	0	1	1	0	0
NONRATT003431.2	NONRATT003431.2	PMID24510058	Fbxl11.bSep08	-	1:219600061-219603197	571	0.728315	0.995217	1.2386	1.08227	0.716541	1.12871	10	12	15	14	9	14
NONRATT019161.2	NONRATT019161.2	PMID24510058	Fubp3.dSep08	-	3:10222290-10226286	685	1.21421	0	0	0.257739	0	0	20	0	0	4	0	0
ENSRNOT00000086191	NONRATT032814.1	ensembl	-	Rn60_20_0046.4	20:2491696-2492504	809	5.19197	6.38027	8.27575	7.25663	5.28189	5.06453	101	109	142	133	94	89
NONRATT003158.2	NONRATT003158.2	PMID24510058	tygley.aSep08-unspliced	-	1:197839426-197840027	602	0.276297	0.31463	0.156648	0.36663	0.226548	0.0765092	4	4	2	5	3	1
NONRATT000851.2	NONRATT000851.2	-	-	-	1:142078232-142082799	497	0.502086	0.0952754	0.189743	0.0888533	0.731698	0.463178	6	1	2	1	8	5
NONRATT004819.2	NONRATT004819.2	PMID24510058	feenee.aSep08-unspliced	-	10:85125458-85126270	813	0.56267	0.931952	0.927885	1.24875	1.39785	1.07588	11	16	16	23	25	19
NONRATT031149.2	NONRATT031149.2	-	-	-	X:106104504-106109122	623	0.600779	0.91215	0.227014	0.425083	0.364803	0.147786	9	12	3	6	5	2
NONRATT011677.2	NONRATT011677.2	PMID24510058	spawgoy.aSep08-unspliced	-	16:83841106-83841660	555	0.899159	1.4505	3.1432	1.74969	1.22858	1.65893	12	17	37	22	15	20
NONRATT011044.2	NONRATT011044.2	PMID24510058	RGD1309922.cSep08	-	15:51831923-51834030	399	0.521188	0.593382	0.472693	0.331919	0.569604	0.230753	5	5	4	3	5	2
NONRATT022854.2	NONRATT022854.2	PMID24510058	vawvar.cSep08-unspliced	-	5:165761374-165762601	914	1.36499	2.1242	1.0317	2.22147	0.696299	2.97171	30	41	20	46	14	59
NONRATT031307.2	NONRATT031307.2	PMID24510058	Mbnl3.eSep08	-	X:138394270-138462107	605	0.137464	0.0782676	0.0778964	0.218902	0.075116	0.0761298	2	1	1	3	1	1
NONRATT016962.2	NONRATT016962.2	PMID24510058	Lphn2.dSep08	-	2:258794879-258800753	773	0.64558	0.612633	0.914933	0.970718	1.11732	1.4293	12	10	15	17	19	24
NONRATT023708.2	NONRATT023708.2	PMID24510058	bleywar.aSep08-unspliced	-	5:152961281-152964017	2737	8.4937	9.04875	10.198	11.3857	11.5763	11.7403	559	523	592	706	697	698
NONRATT006346.2	NONRATT006346.2	PMID24510058	sumer.aSep08-unspliced	-	10:109371568-109373587	2020	4.81753	6.61088	5.97524	7.95392	7.85389	6.56355	234	282	256	364	349	288
NONRATT017505.2	NONRATT017505.2	-	-	-	20:3170914-3199288	995	0	0	0.331693	0	0	0.462665	0	0	7	0	0	10
ENSRNOT00000083923	NONRATT031749.1	ensembl	-	AC141136.1	11:43028587-43043248	1261	0.989376	1.01395	0.859956	0.770084	0.901231	0.511097	30	27	23	22	25	14
MSTRG.6587.1	-	-	-	-	13:90024601-90025570	939	3.10023	2.1685	1.65699	2.5854	2.46896	1.86303	70	43	33	55	51	38
NONRATT020252.2	NONRATT020252.2	PMID24510058	Foxp2.bSep08	-	4:41913565-41938499	723	0.460169	0.130987	0.260864	0.793656	0.440123	0.25469	8	2	4	13	7	4
NONRATT009667.2	NONRATT009667.2	PMID24510058	skoyjey.aSep08	-	14:115446063-115449802	352	1.53584	0.672612	1.74131	1.88094	1.29145	1.04625	13	5	13	15	10	8
MSTRG.19312.1	-	-	-	-	7:9984418-9992176	638	1.23848	1.92977	3.32552	1.52206	2.4938	1.94824	19	26	45	22	35	27
NONRATT021317.2	NONRATT021317.2	PMID24510058	Slc35b4.dSep08	-	4:61553615-61555042	682	6.64663	4.9993	2.00486	3.62441	2.93276	3.64509	109	72	29	56	44	54
NONRATT016849.2	NONRATT016849.2	PMID24510058	klawshee.bSep08	-	2:227718791-227719470	523	1.51081	1.35817	1.98332	1.60352	1.30375	1.40834	19	15	22	19	15	16
NONRATT007266.2	NONRATT007266.2	-	-	-	12:10580198-10581024	827	1.30746	3.6647	1.5963	2.08155	2.63841	1.78135	26	64	28	39	48	32
NONRATT004752.2	NONRATT004752.2	PMID24510058	Thymosin.2.aSep08-unspliced	-	10:81450792-81451108	317	0.131176	0.448125	0.297484	0.69625	0.716947	0.580886	1	3	2	5	5	4
NONRATT000571.2	NONRATT000571.2	-	-	-	1:87957988-87958796	724	0.114869	0.261613	0.260504	0.426777	0.125603	0.381507	2	4	4	7	2	6
NONRATT028732.2	NONRATT028732.2	PMID24510058	sypor.aSep08	-	8:78872572-78879229	396	0.420028	0.597877	0.476274	0.334433	0.344398	0.465002	4	5	4	3	3	4
ENSRNOT00000088045	NONRATT031974.1	ensembl	-	AABR07015517.1	14:61298736-61299894	615	0	0	0.153337	0.287075	0.147864	0.149708	0	0	2	4	2	2
NONRATT017511.2	NONRATT017511.2	PMID24510058	nyboy.aSep08-unspliced	-	20:3306914-3307767	854	0	0.221789	0.331273	0.103367	0.425824	0.107811	0	4	6	2	8	2
ENSRNOT00000080798	ENSRNOT00000080798	ensembl:lincRNA	-	AABR07040908.1	X:113800100-113800991	145	0.286778	0.653129	1.62574	0.608797	0.940564	0.634968	1	2	5	2	3	2
NONRATT025230.2	NONRATT025230.2	PMID24510058	Rbm25.bSep08	-	6:107157798-107164592	1383	5.08189	3.0474	4.53416	0.989399	3.35264	4.02775	169	89	133	31	102	121
NONRATT005989.2	NONRATT005989.2	PMID24510058	choynee.aSep08-unspliced	-	10:87116826-87117378	553	0.15039	10.8753	0.341057	0.319261	0.328801	10.9887	2	127	4	4	4	132
NONRATT014661.2	NONRATT014661.2	PMID24510058	LOC690214.bSep08-unspliced	-	19:39244758-39245658	901	7.06198	4.51997	6.59346	4.16412	7.46701	17.0655	153	86	126	85	148	334
NONRATT001039.2	NONRATT001039.2	PMID24510058	Clpb.dSep08-unspliced	-	1:166864890-166865213	324	0.770175	0.292296	0.582113	0.408752	0.280668	0.284168	6	2	4	3	2	2
NONRATT021771.2	NONRATT021771.2	PMID24510058	Ankrd26.aSep08	-	4:150553015-150560632	393	0.529145	0.481953	0.239955	1.01085	0.231391	0.468552	5	4	2	9	2	4
NONRATT009677.2	NONRATT009677.2	PMID24510058	Tmem175.bSep08-unspliced	-	14:2083164-2084928	1765	1.39018	1.36832	1.41578	1.37546	1.00446	1.48673	59	51	53	55	39	57
NONRATT006572.2	NONRATT006572.2	PMID24510058	chamu.aSep08-unspliced	-	11:54473030-54475366	2337	1.83289	2.26944	3.06656	3.34308	2.99553	3.1321	103	112	152	177	154	159
NONRATT002719.2	NONRATT002719.2	PMID24510058	Nipa2.eSep08	-	1:114359596-114371860	715	0.40716	0.198679	0.197804	0.123462	0.254303	0.193187	7	3	3	2	4	3
NONRATT006376.2	NONRATT006376.2	PMID24510058	RGD1305007.dSep08	-	10:110401785-110403445	693	0.600098	0.409973	0.680323	0.445868	0.918351	0.531431	10	6	10	7	14	8
NONRATT015470.2	NONRATT015470.2	PMID24510058	Tpm3.gSep08-unspliced	-	2:189438576-189439324	749	2.77621	3.35085	2.70678	3.41806	3.45943	3.99514	50	53	43	58	57	65
NONRATT021186.2	NONRATT021186.2	PMID24510058	cherwoy.aSep08-unspliced	-	4:27227796-27228179	384	0.758124	0.493249	0.491158	0.689653	0.591854	0.599478	7	4	4	6	5	5
NONRATT025246.2	NONRATT025246.2	PMID24510058	LOC688673.cSep08	-	6:111145875-111150804	342	0.364761	0.692279	1.24075	0.90347	0.664538	0.673098	3	5	9	7	5	5
NONRATT003046.2	NONRATT003046.2	PMID24510058	LOC499235.aSep08-unspliced	-	1:171994351-171995362	1012	10.027	9.45221	5.59072	6.97862	7.5015	6.41411	244	202	120	160	167	141
NONRATT024156.2	NONRATT024156.2	PMID24510058	bortee.aSep08-unspliced	-	6:37662696-37665299	2604	0.0798594	0.290966	0.162956	0.288159	0.069826	0.176787	5	16	9	17	4	10
NONRATT030507.2	NONRATT030507.2	PMID24510058	rarbar.aSep08-unspliced	-	X:32326644-32327417	774	0.214898	0.67302	1.09648	0.684364	0.587326	0.416369	4	11	18	12	10	7
NONRATT014508.2	NONRATT014508.2	PMID24510058	nerdaw.aSep08-unspliced	-	19:19434716-19436077	1362	0.641203	0.556297	0.55387	0.486115	0.5674	0.135199	21	16	16	15	17	4
NONRATT031074.2	NONRATT031074.2	PMID24510058	LOC367858.aSep08	-	X:74371298-74371844	401	2.59274	2.47989	3.05694	0.550402	1.70041	0.688806	25	21	26	5	15	6
NONRATT015930.2	NONRATT015930.2	PMID24510058	Nr2f1.cSep08-unspliced	-	2:5575251-5576107	857	0.145564	0.165759	0.385104	0.103005	0.159139	0.161177	3	3	7	2	3	3
NONRATT029003.2	NONRATT029003.2	PMID24510058	slarrey.aSep08-unspliced	-	8:117907563-117908277	715	0	0.0662264	0.0659123	0	0.0635597	0	0	1	1	0	1	0
NONRATT000323.2	NONRATT000323.2	PMID24510058	RGD1562044.dSep08	-	1:71244294-71253417	405	0.513467	0.701509	0.349209	0.544966	0.448955	0.682003	5	6	3	5	4	6
NONRATT024748.2	NONRATT024748.2	PMID24510058	Fez2.fSep08-unspliced	-	6:967298-967628	331	0.502511	0.286114	0.284901	0.266694	0.686623	0.417308	4	2	2	2	5	3
MSTRG.21444.1	-	-	-	-	8:78611011-78618652	7543	1.6926	1.92105	3.16281	2.44604	2.55524	3.03937	307	306	506	418	424	498
MSTRG.6507.1	-	-	-	-	13:83619661-83622994	3310	1.57052	1.93138	2.49273	2.62706	2.3347	2.75382	125	135	175	197	170	198
NONRATT005513.2	NONRATT005513.2	PMID24510058	zawmee.dSep08	-	10:48637517-48639354	318	1.30776	1.6381	2.22404	1.80445	3.14488	2.02671	10	11	15	13	22	14
NONRATT011429.2	NONRATT011429.2	PMID24510058	RGD1308759.fSep08	-	16:21150245-21151133	613	0.949819	1.39051	2.15357	2.44824	2.0764	2.17789	14	18	28	34	28	29
NONRATT025640.2	NONRATT025640.2	PMID24510058	Cd320.cSep08	-	7:18703707-18706244	1017	3.026	3.63189	3.5234	0.564222	0.804567	3.48553	74	78	76	13	18	77
NONRATT027194.2	NONRATT027194.2	PMID24510058	plysoy.aSep08-unspliced	-	7:125738578-125739368	791	1.0515	1.37692	1.54973	1.45086	1.55169	1.68779	20	23	26	26	27	29
NONRATT023318.2	NONRATT023318.2	PMID24510058	morvoy.aSep08-unspliced	-	5:84916541-84917781	1241	0	0	0.075989	0.0355843	0	0.0741905	0	0	2	1	0	2
NONRATT024160.2	NONRATT024160.2	PMID24510058	Rock2.cSep08	-	6:42286714-42287230	517	4.42416	3.29741	3.28307	3.41509	2.19817	2.04803	55	36	36	40	25	23
NONRATT031135.2	NONRATT031135.2	PMID24510058	zeyber.aSep08-unspliced	-	X:104494723-104495380	658	0.31604	0.863631	0.42995	0.7379	0.759932	0.839548	5	12	6	11	11	12
NONRATT024021.2	NONRATT024021.2	PMID24510058	Socs5.bSep08	-	6:10696116-10701213	660	0.819115	1.07625	1.28587	0.869415	0.619917	0.627788	13	15	18	13	9	9
NONRATT023766.2	NONRATT023766.2	PMID24510058	RGD1560187.dSep08	-	5:157546856-157549341	714	2.50457	2.25498	2.77346	2.04008	1.84633	2.96592	43	34	42	33	29	46
NONRATT029995.2	NONRATT029995.2	-	-	-	9:54304608-54308682	785	0.529768	0.72391	1.08111	0.899681	1.10024	1.05558	10	12	18	16	19	18
NONRATT028405.2	NONRATT028405.2	-	-	-	8:36764035-36771860	741	0	0.63909	0.254527	0.178726	0.184051	0.931918	0	10	4	3	3	15
NONRATT013543.2	NONRATT013543.2	PMID24510058	swyfar.aSep08-unspliced	-	18:65325880-65326787	868	0.335391	0.600135	0.869091	0.559376	0.785556	1.00771	7	11	16	11	15	19
NONRATT005503.2	NONRATT005503.2	PMID24510058	zomee.aSep08	-	10:47903587-47907625	1088	0	0.130566	0	0.0405883	0.125351	0	0	3	0	1	3	0
NONRATT018717.2	NONRATT018717.2	PMID24510058	Fkbp1a.bSep08	-	3:147058194-147061661	1218	2.35594	2.64377	2.63226	1.95696	3.28434	2.38119	69	68	68	54	88	63
NONRATT024669.2	NONRATT024669.2	PMID24510058	Ckb.cSep08-unspliced	-	6:136143503-136144091	589	0.917854	1.44717	0.56033	1.12409	1.92946	1.25053	13	18	7	15	25	16
NONRATT006174.2	NONRATT006174.2	PMID24510058	Icam2.eSep08	-	10:94572472-94576518	589	0	0.321575	0	0	0.0771565	0.781583	0	4	0	0	1	10
NONRATT005284.2	NONRATT005284.2	PMID24510058	Haghl.dSep08	-	10:15154003-15155387	700	0	0	0.202042	0.504432	0.0649217	0	0	0	3	8	1	0
NONRATT004652.2	NONRATT004652.2	PMID24510058	leemee.bSep08	-	10:67781466-67784857	3392	4.79381	5.05376	5.87965	5.40037	4.56993	6.50096	391	362	423	415	341	479
NONRATT028419.2	NONRATT028419.2	PMID24510058	LOC680549.aSep08	-	8:39380394-39404744	386	1.07738	0	0.366398	0.228693	0.235587	0.238524	10	0	3	2	2	2
NONRATT014865.2	NONRATT014865.2	PMID24510058	klershaw.bSep08	-	2:2549543-2552236	640	0.194919	0.0739873	0.294695	0	0.0710081	0.0719664	3	1	4	0	1	1
NONRATT004675.2	NONRATT004675.2	PMID24510058	shonar.aSep08-unspliced	-	10:71323145-71325578	2434	1.84528	2.37356	2.47946	2.03108	1.84896	2.30747	108	122	128	112	99	122
NONRATT019203.2	NONRATT019203.2	PMID24510058	gleecho.aSep08-unspliced	-	3:12182046-12182696	651	0.638814	0.290949	1.01393	0.4068	0.4888	0.353609	10	4	14	6	7	5
NONRATT026700.2	NONRATT026700.2	PMID24510058	smoroy.aSep08	-	7:36880045-36883460	853	0.780076	1.1103	0.442215	1.91461	1.91851	2.1588	16	20	8	37	36	40
ENSRNOT00000075846	NONRATT007893.2	PMID24510058	RGD1566086.aSep08	Gtf2ird2	12:25513105-25516941	474	0.263182	0.399594	0.19895	0.558706	0.479477	0.971207	3	4	2	6	5	10
NONRATT016618.2	NONRATT016618.2	PMID24510058	LOC361990.fSep08	-	2:189889362-189892175	852	19.2316	21.7876	20.3646	18.9097	14.0856	14.805	394	392	368	365	264	274
NONRATT010029.2	NONRATT010029.2	PMID24510058	Grk4.cSep08	-	14:81265754-81278649	731	0.796497	0.323884	0.773962	1.44918	0.497474	0.377854	14	5	12	24	8	6
NONRATT015472.2	NONRATT015472.2	PMID24510058	Tpm3.kSep08	-	2:189439816-189450110	432	2.5992	4.05582	3.60166	3.47401	4.20906	3.83638	27	37	33	34	40	36
NONRATT000378.2	NONRATT000378.2	PMID24510058	charflor.aSep08-unspliced	-	1:78053476-78053900	425	0.0978418	0.111416	0.110888	0.207707	0.10693	0.108373	1	1	1	2	1	1
NONRATT019652.2	NONRATT019652.2	PMID24510058	Cops2.dSep08	-	3:118122857-118125840	925	3.01224	3.83954	2.6505	3.24487	3.09608	3.28472	67	75	52	68	63	66
NONRATT006149.2	NONRATT006149.2	PMID24510058	Rnf190.cSep08-unspliced	-	10:93591186-93591858	673	0	0.0703594	0.140122	0.0656168	0	0	0	1	2	1	0	0
NONRATT014695.2	NONRATT014695.2	PMID24510058	Txnl4b.aSep08	-	19:42101902-42110229	1821	8.79245	7.72339	7.22371	9.42912	7.98823	7.20499	385	297	279	389	320	285
NONRATT023220.2	NONRATT023220.2	PMID24510058	glorvey.aSep08-unspliced	-	5:61692860-61693528	669	0.559469	0.3539	0.775245	0.725767	0.271789	0.894591	9	5	11	11	4	13
ENSRNOT00000088863	NONRATT032930.1	ensembl	-	AABR07054656.1	3:165961601-165985144	766	1.41158	1.05095	0.677074	1.21007	1.78032	1.0217	26	17	11	21	30	17
NONRATT012166.2	NONRATT012166.2	PMID24510058	LOC690087.aSep08-unspliced	-	16:88005535-88005760	226	0.551984	1.04761	0.834534	0.585999	0.804544	0.61119	3	5	4	3	4	3
NONRATT024158.2	NONRATT024158.2	PMID24510058	kawtee.aSep08-unspliced	-	6:42105549-42105976	428	1.749	2.10218	2.20321	1.75319	1.06213	2.04367	18	19	20	17	10	19
NONRATT000946.2	NONRATT000946.2	PMID24510058	Tmem126a.cSep08	-	1:156283122-156287850	739	1.51943	2.1787	1.14841	0.895926	0.861187	1.37047	27	34	18	15	14	22
NONRATT002354.2	NONRATT002354.2	PMID24510058	staflor.aSep08-unspliced	-	1:80214469-80215287	819	0.355457	0.289083	0.172686	0	0.166522	0.112418	7	5	3	0	3	2
NONRATT004661.2	NONRATT004661.2	PMID24510058	sonar.aSep08-unspliced	-	10:70310274-70312073	1800	0.0924061	0.131533	0.10478	0.098084	3.51038	0.179039	4	5	4	4	139	7
NONRATT015896.2	NONRATT015896.2	PMID24510058	slorshee.aSep08	-	2:258991111-258997086	675	0.123208	0.280604	0.279414	0.196201	0.134721	0.341036	2	4	4	3	2	5
NONRATT015035.2	NONRATT015035.2	PMID24510058	RGD1559494.bSep08	-	2:52672516-52679405	1673	0.522007	0.0566071	0.845451	1.02895	1.22273	0.825525	21	2	30	39	45	30
NONRATT023805.2	NONRATT023805.2	PMID24510058	Ctrc.bSep08-unspliced	-	5:160402790-160403674	885	0.234976	0.10701	0.0532512	0.0997464	0.102753	0.260112	5	2	1	2	2	5
NONRATT010254.2	NONRATT010254.2	PMID24510058	pujy.aSep08-unspliced	-	15:4281865-4282355	491	4.82782	5.59379	2.30464	1.88781	3.8885	3.37539	57	58	24	21	42	36
ENSRNOT00000047544	ENSRNOT00000047544	ensembl:lincRNA	-	RGD1565989	2:127916171-127947952	845	0.246099	0.112075	0.223201	0.365665	0.21518	0.163466	5	2	4	7	4	3
NONRATT010035.2	NONRATT010035.2	PMID24510058	RGD1309634.dSep08-unspliced	-	14:81515897-81517008	1112	8.52687	8.98544	9.03111	8.85179	4.37412	9.23203	228	211	213	223	107	223
NONRATT005331.2	NONRATT005331.2	PMID24510058	neemee.bSep08-unspliced	-	10:16814314-16814756	443	1.50204	2.031	1.80936	2.09236	1.12875	0.831336	16	19	17	21	11	8
NONRATT021222.2	NONRATT021222.2	PMID24510058	Slc25a13.dSep08-unspliced	-	4:31134633-31135443	811	45.5869	48.5224	46.7996	49.5281	41.7026	50.5772	889	831	805	910	744	891
NONRATT002823.2	NONRATT002823.2	PMID24510058	Wdr73.dSep08	-	1:142711777-142712931	687	0	0.551405	3.56873	4.24051	3.44075	3.35052	0	8	52	66	52	50
NONRATT024677.2	NONRATT024677.2	PMID24510058	tawvu.aSep08-unspliced	-	6:135763451-135765018	1568	2.30746	2.86904	3.21739	3.26544	2.98609	2.61301	87	95	107	116	103	89
NONRATT002958.2	NONRATT002958.2	PMID24510058	Mogat2.cSep08	-	1:164182584-164185362	702	0	0.0674528	0.0671329	0	0.0647368	0	0	1	1	0	1	0
NONRATT008934.2	NONRATT008934.2	PMID24510058	Hsd17b7.dSep08-unspliced	-	13:88289879-88290906	1028	0.20229	0.138186	0.0458437	0.386442	0	0	5	3	1	9	0	0
NONRATT012613.2	NONRATT012613.2	PMID24510058	nofer.bSep08	-	17:76287747-76288470	532	0.547217	0.356029	1.41799	0.0830077	0.170933	0.173065	7	4	16	1	2	2
NONRATT014028.2	NONRATT014028.2	PMID24510058	Ccdc102a.bSep08	-	19:10525309-10531710	1379	0.361881	0.274703	0.478657	0.352094	0.329652	0.667661	12	8	14	11	10	20
NONRATT004668.2	NONRATT004668.2	PMID24510058	zunar.aSep08-unspliced	-	10:70847262-70847935	674	0	0	0.0699218	0.130973	0	0.0683361	0	0	1	2	0	1
NONRATT014534.2	NONRATT014534.2	PMID24510058	Il15.aSep08	-	19:23542615-23608598	1149	2.96793	2.80254	3.52895	4.84041	3.08594	3.36554	82	68	86	126	78	84
NONRATT023819.2	NONRATT023819.2	PMID24510058	slawwaw.aSep08-unspliced	-	5:161911976-161912695	720	0.0577538	0.0657665	0.0654546	0	0	0.0639702	1	1	1	0	0	1
NONRATT008395.2	NONRATT008395.2	PMID24510058	Vamp4.dSep08-unspliced	-	13:80481381-80483594	2214	2.1977	3.27247	4.08875	3.20981	4.10642	3.36849	117	153	192	161	200	162
NONRATT019283.2	NONRATT019283.2	PMID24510058	RGD1303272.eSep08	-	3:35783506-35785118	845	3.05138	3.92286	5.41231	2.19394	2.42087	1.7434	62	70	97	42	45	32
NONRATT008607.2	NONRATT008607.2	PMID24510058	LOC679594.aSep08-unspliced	-	13:14315636-14316033	398	15.3601	15.9435	17.888	10.0923	15.8761	13.8802	147	134	151	91	139	120
NONRATT023395.2	NONRATT023395.2	PMID24510058	blowa.aSep08-unspliced	-	5:114871327-114871835	509	0.408554	0.279088	0.555809	0.0867585	0.26794	0.180885	5	3	6	1	3	2
NONRATT019338.2	NONRATT019338.2	PMID24510058	Rnf128.bSep08	-	X:110862149-110869352	757	0.714156	0.938342	0.685124	0.524785	0.660549	0.42572	13	15	11	9	11	7
NONRATT007340.2	NONRATT007340.2	-	-	-	12:18534213-18534765	439	0.757864	1.29446	1.07395	1.00542	1.24255	0.943827	8	12	10	10	12	9
NONRATT024568.2	NONRATT024568.2	PMID24510058	spatu.aSep08	-	6:124895778-124899781	384	0.108288	0.123312	0	0.115	0.118347	0	1	1	0	1	1	0
NONRATT023129.2	NONRATT023129.2	PMID24510058	Spaca1.aSep08	-	5:49424064-49429084	414	0.100441	0.114377	0	0	0.219653	0	1	1	0	0	2	0
NONRATT002962.2	NONRATT002962.2	PMID24510058	Serpinh1.dSep08	-	1:164304396-164308280	393	1.2698	2.16891	0	1.79707	0	1.17138	12	18	0	16	0	10
NONRATT021666.2	NONRATT021666.2	PMID24510058	storzee.aSep08-unspliced	-	4:129748693-129749586	894	4.00054	5.08508	4.00816	3.90049	4.52548	3.86209	86	96	76	79	89	75
NONRATT013986.2	NONRATT013986.2	PMID24510058	Fam96b.bSep08	-	19:551742-553555	1039	1.08071	1.82307	1.13446	1.44444	1.6188	1.63939	27	40	25	34	37	37
ENSRNOT00000092177	ENSRNOT00000092177	ensembl:lincRNA	-	AABR07043748.2	19:38365475-38385915	505	11.8585	13.3155	10.4566	9.43981	9.36166	9.66302	144	142	112	108	104	106
NONRATT010478.2	NONRATT010478.2	PMID24510058	Ift88.bSep08	-	15:37709861-37714823	390	0.213245	0.48566	0.483602	0.452695	0.349697	0.236078	2	4	4	4	3	2
NONRATT009364.2	NONRATT009364.2	PMID24510058	Ugdh.cSep08-unspliced	-	14:44492652-44493044	393	3.5979	3.25342	2.51934	2.13394	1.73502	2.57703	34	27	21	19	15	22
NONRATT013732.2	NONRATT013732.2	PMID24510058	Brd8.hSep08	-	18:27402642-27405900	757	0.164793	0.31276	0.373721	0.233225	0.240194	0.182469	3	5	6	4	4	3
NONRATT010027.2	NONRATT010027.2	PMID24510058	Transposase_22.3.aSep08-unspliced	-	14:81209167-81210198	1032	1.04774	1.74367	1.37058	1.11204	1.10121	1.1598	26	38	30	26	25	26
NONRATT004933.2	NONRATT004933.2	PMID24510058	Tmub2.dSep08-unspliced	-	10:90231197-90232866	1670	3.95951	4.19671	5.95706	6.26417	4.6547	5.09981	159	148	211	237	171	185
NONRATT001544.2	NONRATT001544.2	-	-	-	1:226475548-226475898	351	0.118469	0.134906	0.268668	0.125812	0.388552	0.262309	1	1	2	1	3	2
NONRATT007336.2	NONRATT007336.2	PMID24510058	Dhrsx.fSep08	-	12:18516928-18518193	296	4.07439	6.07927	7.00847	5.81568	5.06793	5.13238	29	38	44	39	33	33
NONRATT023002.2	NONRATT023002.2	PMID24510058	neyvaw.aSep08-unspliced	-	5:9047142-9048485	1308	7.40813	5.21334	8.65108	7.15417	7.05505	6.93356	233	144	240	212	203	197
NONRATT018208.2	NONRATT018208.2	PMID24510058	geychee.aSep08-unspliced	-	3:54268534-54269611	1078	0.115722	0.0878513	0.0437173	0.0409648	0	0.256226	3	2	1	1	0	6
NONRATT011315.2	NONRATT011315.2	-	-	-	16:10742712-10743892	387	0.107449	0.122356	0.121776	0.228102	0.469837	0.119014	1	1	1	2	4	1
NONRATT000333.2	NONRATT000333.2	PMID24510058	Ttyh1.fSep08-unspliced	-	1:73747493-73748124	632	0.0657955	0.0749239	0.0745685	0	0.071907	0.0728774	1	1	1	0	1	1
NONRATT021398.2	NONRATT021398.2	PMID24510058	Tmem176b.gSep08	-	4:78450757-78451592	480	0.259892	0.690548	1.27696	0.919537	0.473484	0.383627	3	7	13	10	5	4
NONRATT017642.2	NONRATT017642.2	PMID24510058	Btbd9.bSep08	-	20:8984983-8985418	239	0.173986	0.198125	0.197185	0.18477	0.190147	0.385232	1	1	1	1	1	2
NONRATT010442.2	NONRATT010442.2	-	-	-	15:34286123-34286537	415	0.400798	0.798706	0.681703	0.957259	0.328631	0.665569	4	7	6	9	3	6
NONRATT009312.2	NONRATT009312.2	PMID24510058	porka.aSep08-unspliced	-	14:35137730-35138289	560	0.14851	0	0	0	0.0811522	0.0822474	2	0	0	0	1	1
NONRATT018153.2	NONRATT018153.2	PMID24510058	tychaw.aSep08-unspliced	-	3:43356455-43356937	483	8.3519	10.9807	9.07825	9.13872	9.22334	6.48124	97	112	93	100	98	68
NONRATT011301.2	NONRATT011301.2	PMID24510058	Oxnad1.cSep08	-	16:8207687-8218807	1057	6.84595	3.89768	7.18153	7.18265	6.45101	7.5783	174	87	161	172	150	174
NONRATT016710.2	NONRATT016710.2	PMID24510058	steebler.aSep08-unspliced	-	2:202794278-202795274	863	4.43339	3.5667	5.51796	5.01243	4.05591	5.38775	92	65	101	98	77	101
NONRATT020130.2	NONRATT020130.2	PMID24510058	Fastk.gSep08	-	4:7264025-7264589	488	16.3622	17.0787	16.1348	15.467	13.9728	12.2637	192	176	167	171	150	130
NONRATT012246.2	NONRATT012246.2	PMID24510058	LOC685249.cSep08	-	17:8438885-8443216	382	0.326566	0.619789	0.246865	0.577778	0.833007	0.361594	3	5	2	5	7	3
NONRATT022498.2	NONRATT022498.2	PMID24510058	Spata6.bSep08	-	5:131719978-131740535	580	0.143389	0.163282	0.16259	0.0761381	0.391848	0.158742	2	2	2	1	5	2
NONRATT029758.2	NONRATT029758.2	PMID24510058	veypey.aSep08-unspliced	-	9:121880447-121880903	457	0	0.310844	0.206351	0.0966304	0.198986	0.100785	0	3	2	1	2	1
NONRATT015654.2	NONRATT015654.2	-	-	-	2:206407001-206444749	376	1.10603	0.881551	2.50791	1.5261	1.93433	1.34684	10	7	20	13	16	11
NONRATT006742.2	NONRATT006742.2	PMID24510058	blamaw.aSep08-unspliced	-	11:86914092-86914488	397	0.41897	1.31213	1.06886	0.555948	0.916005	0.347932	4	11	9	5	8	3
NONRATT011149.2	NONRATT011149.2	-	-	-	15:85946529-85962795	604	0.826214	0.705652	1.0148	0.657719	1.12891	0.685994	12	9	13	9	15	9
NONRATT012472.2	NONRATT012472.2	PMID24510058	Gmnn.cSep08	-	17:42308904-42309460	362	0.459478	0.130806	0.260504	0.243855	0.376745	0.254338	4	1	2	2	3	2
NONRATT014891.2	NONRATT014891.2	PMID24510058	Tmem161b.aSep08	-	2:12251352-12538495	1050	0.871334	1.75887	0.493942	0.672618	0.735999	0.920726	22	39	11	16	17	21
NONRATT001391.2	NONRATT001391.2	PMID24510058	Mtl5.bSep08	-	1:218637422-218640665	298	0	0	0.316451	0	0.152501	0	0	0	2	0	1	0
NONRATT003432.2	NONRATT003432.2	PMID24510058	kagloy.aSep08-unspliced	-	1:219672406-219672758	353	2.23839	1.34155	1.33559	1.87561	2.31797	1.04329	19	10	10	15	18	8
NONRATT021547.2	NONRATT021547.2	-	-	-	4:115289657-115290410	754	0.110299	0.125602	0.125069	0.117076	0.0602722	0.0610856	2	2	2	2	1	1
NONRATT004179.2	NONRATT004179.2	PMID24510058	PWWP.0.aSep08-unspliced	-	10:29320194-29321479	1286	2.03732	2.35669	3.48297	2.53991	3.25207	3.2576	63	64	95	74	92	91
NONRATT000451.2	NONRATT000451.2	PMID24510058	fafloy.aSep08-unspliced	-	1:81008974-81009561	588	0.070719	0.0805304	0	0.225231	0.0772878	0	1	1	0	3	1	0
NONRATT003882.2	NONRATT003882.2	PMID24510058	5_nucleotid.0.dSep08	-	1:266663868-266675150	927	2.51227	2.40095	3.15338	4.42828	3.3836	4.41985	56	47	62	93	69	89
ENSRNOT00000082520	NONRATT032733.1	ensembl	-	AABR07010986.1	2:156399129-156406032	1018	0.245125	0.139544	0.138929	0.0867147	0.0893286	0.180885	6	3	3	2	2	4
NONRATT015844.2	NONRATT015844.2	PMID24510058	Odf2l.cSep08	-	2:251003975-251011284	367	0.226609	0.258048	0.513909	0.601393	0.371612	0.627246	2	2	4	5	3	5
NONRATT028533.2	NONRATT028533.2	PMID24510058	sloru.aSep08-unspliced	-	8:53841769-53842039	271	0.306884	0	0.52188	0.162952	0.167694	0	2	0	3	1	1	0
NONRATT004165.2	NONRATT004165.2	PMID24510058	swomor.aSep08-unspliced	-	10:20611529-20615258	3730	1.18184	1.04104	1.94661	2.49692	1.51121	2.11051	106	82	154	211	124	171
NONRATT028929.2	NONRATT028929.2	PMID24510058	sherpor.aSep08	-	8:112828749-112829982	501	1.90923	2.74111	3.85844	4.05275	3.9923	4.7782	23	29	41	46	44	52
NONRATT021484.2	NONRATT021484.2	PMID24510058	Mrpl35.cSep08	-	4:99741274-99749928	781	0.053243	0	0	0.113029	0	0.0589738	1	0	0	2	0	1
ENSRNOT00000083877	ENSRNOT00000083877	ensembl:lincRNA	-	AABR07037943.1	X:35972373-35984183	1616	1.26099	1.40658	1.37128	1.25645	1.20959	1.36741	49	48	47	46	43	48
NONRATT026978.2	NONRATT026978.2	PMID24510058	LOC500877.bSep08-unspliced	-	7:101135718-101138208	2491	0	4.01116	27.407	3.40219	0	4.23214	0	211	1448	192	0	229
NONRATT006028.2	NONRATT006028.2	PMID24510058	feemer.bSep08	-	10:88676030-88677061	421	0.395086	0.562374	0.671988	0.838723	0.647894	0.328097	4	5	6	8	6	3
NONRATT030563.2	NONRATT030563.2	PMID24510058	smoybaw.aSep08-unspliced	-	X:67833688-67835273	1586	6.87002	9.13652	9.39401	9.43468	7.36616	7.16955	262	306	316	339	257	247
NONRATT019116.2	NONRATT019116.2	PMID24510058	moychu.aSep08-unspliced	-	3:7157419-7157925	507	0.820252	0.653773	1.30191	1.13178	1.0759	1.08959	10	7	14	13	12	12
NONRATT000572.2	NONRATT000572.2	PMID24510058	Rasgrp4.bSep08-unspliced	-	1:88089380-88089659	280	0.14851	0.338228	0.336794	0.157715	0.162304	0.328823	1	2	2	1	1	2
NONRATT017038.2	NONRATT017038.2	PMID24510058	morboy.aSep08-unspliced	-	20:3278622-3280103	1482	0.308671	0	0.0317998	0	0	0.15533	11	0	1	0	0	5
NONRATT013760.2	NONRATT013760.2	-	-	-	18:29496944-29497678	735	0.339506	0.322122	0.51321	0.660596	0.865874	0.438462	6	5	8	11	14	7
NONRATT027313.2	NONRATT027313.2	PMID24510058	Col2a1.aSep08	-	7:139454938-139469106	3854	0.129485	0	0.0978747	0	0	0.05973	12	0	8	0	0	5
NONRATT021902.2	NONRATT021902.2	PMID24510058	veewey.aSep08	-	4:159516487-159517121	541	0.99929	1.22546	1.74302	2.28448	1.93256	2.21241	13	14	20	28	23	26
NONRATT030722.2	NONRATT030722.2	PMID24510058	RGD1565411.eSep08	-	7:140980653-140981580	748	0.278013	1.01294	0.189077	1.18021	0.668497	0.923197	5	16	3	20	11	15
NONRATT000659.2	NONRATT000659.2	PMID24510058	Josd2.aSep08	-	1:100473747-100477175	689	1.44863	1.64948	2.32662	2.17819	2.50715	1.93766	24	24	34	34	38	29
NONRATT013036.2	NONRATT013036.2	PMID24510058	Hist1h2bp.aSep08-unspliced	-	17:44748560-44749143	584	0.356086	0.162164	1.04956	0.302314	0.700591	0.236522	5	2	13	4	9	3
MSTRG.292.1	-	-	-	-	1:41018803-41046296	268	0	1.2368	0.879597	1.97649	2.03538	2.74837	0	7	5	12	12	16
NONRATT002262.2	NONRATT002262.2	PMID24510058	LOC691168.aSep08-unspliced	-	1:69941706-69942329	624	0	0	0	0.0707693	0.0728289	0.147549	0	0	0	1	1	2
NONRATT028236.2	NONRATT028236.2	PMID24510058	morpor.aSep08	-	8:1435679-1437447	1769	3.40879	3.53353	3.78467	4.39153	3.46911	3.87754	145	132	142	176	135	149
NONRATT001722.2	NONRATT001722.2	PMID24510058	jawklar.aSep08-unspliced	-	1:260135698-260136491	794	0.261907	0.656067	0.296892	0.333535	0.343531	0.115958	5	11	5	6	6	2
NONRATT013011.2	NONRATT013011.2	PMID24510058	keyfer.bSep08	-	17:57316815-57318193	390	0.639838	1.09286	1.20888	5.9985	0.466223	2.47888	6	9	10	53	4	21
MSTRG.458.1	-	-	-	-	1:55366922-55467548	465	0.536638	2.5459	3.54875	0	0.391026	0.891054	6	25	35	0	4	9
MSTRG.458.3	-	-	-	-	1:55403050-55472387	532	0	0.0890073	0.0885851	0	0.512713	0.0865762	0	1	1	0	6	1
MSTRG.458.2	-	-	-	-	1:55367198-55472557	5197	1.82449	6.58791	0.136087	3.88146	2.7553	4.05705	228	723	15	457	315	458
NONRATT025852.2	NONRATT025852.2	-	-	-	7:66646046-66669361	711	0.23394	0.133198	0.265267	0.186267	0.319651	0.194274	4	2	4	3	5	3
NONRATT019837.2	NONRATT019837.2	-	-	-	3:150066525-150067674	382	0.108855	0.123958	0.617099	0.231088	0.118967	0.241022	1	1	5	2	1	2
NONRATT004520.2	NONRATT004520.2	PMID24510058	floymee.aSep08	-	10:58785230-58787707	792	1.20773	0.837087	1.78591	0.668811	1.37753	0.697503	23	14	30	12	24	12
NONRATT024707.2	NONRATT024707.2	PMID24510058	LOC691631.bSep08-unspliced	-	6:137877010-137877438	429	1.3572	0.662264	1.20895	1.13179	0.741745	0.751212	14	6	11	11	7	7
NONRATT015749.2	NONRATT015749.2	PMID24510058	Arhgap29.cSep08	-	2:225564368-225570956	354	6.10888	8.16003	5.46067	6.85788	10.0162	11.184	52	61	41	55	78	86
NONRATT019552.2	NONRATT019552.2	PMID24510058	RGD1311463.eSep08	-	3:97984590-97993710	304	0.273571	0	0	0.435644	0	0	2	0	0	3	0	0
NONRATT006833.2	NONRATT006833.2	PMID24510058	Zfp294.cSep08	-	11:27056092-27058587	289	1.2951	1.63863	3.09965	1.22181	1.73023	1.59291	9	10	19	8	11	10
MSTRG.450.1	-	-	-	-	1:54909812-54931503	790	1.10547	5.93432	7.40052	1.89971	1.66871	2.27265	21	99	124	34	29	39
NONRATT016491.2	NONRATT016491.2	PMID24510058	Tmem144.bSep08	-	2:178607117-178616893	461	7.93858	11.0939	11.4547	8.90459	7.78999	6.79054	88	108	112	93	79	68
NONRATT020396.2	NONRATT020396.2	-	-	-	4:68902110-68903843	298	0.139539	0.158899	0.474596	0.296227	0.457657	0.308961	1	1	3	2	3	2
NONRATT012420.2	NONRATT012420.2	PMID24510058	beefer.aSep08	-	17:31450784-31460652	268	0.310319	0.353372	0.175848	0.494163	0.339315	0.343546	2	2	1	3	2	2
NONRATT022478.2	NONRATT022478.2	PMID24510058	Nrd1.cSep08	-	5:128677191-128681240	356	1.05136	1.06409	1.85412	1.11591	0.893844	2.84487	9	8	14	9	7	22
NONRATT021413.2	NONRATT021413.2	-	-	-	4:80088904-80107886	528	0.236266	0.538089	0.625065	1.1704	0.947037	0.523127	3	6	7	14	11	6
NONRATT003367.2	NONRATT003367.2	PMID24510058	snerflu.dSep08	-	1:215881010-215895580	203	0.204841	0.23326	0.232154	0.217537	0.223868	0.226889	1	1	1	1	1	1
NONRATT000505.2	NONRATT000505.2	PMID24510058	storfly.bSep08-unspliced	-	1:84008948-84009844	897	0.880884	1.00305	1.36659	1.13181	1.11491	1.33435	19	19	26	23	22	26
NONRATT003464.2	NONRATT003464.2	-	-	-	1:221088316-221089493	453	0.45906	0.313589	1.24893	0.0974836	1.60554	1.72764	5	3	12	1	16	17
NONRATT027197.2	NONRATT027197.2	PMID24510058	skusoy.aSep08-unspliced	-	7:125853576-125854426	851	15.1493	18.4744	10.9699	12.3446	12.9804	14.3897	310	332	198	238	243	266
NONRATT021783.2	NONRATT021783.2	PMID24510058	gleezey.aSep08-unspliced	-	4:152026357-152026963	607	0.137011	0.0780097	0.155358	0.0727514	0.0748685	0.0758789	2	1	2	1	1	1
NONRATT009273.2	NONRATT009273.2	PMID24510058	Grsf1.eSep08	-	14:21052281-21055436	730	2.33575	3.04887	3.68144	4.41399	3.11357	3.46844	41	47	57	73	50	55
NONRATT021344.2	NONRATT021344.2	-	-	-	4:66017602-66018381	409	0.915122	0.694649	0.691704	0.863331	0.555678	0.787946	9	6	6	8	5	7
NONRATT026944.2	NONRATT026944.2	PMID24510058	smuser.aSep08-unspliced	-	7:97735880-97736897	1018	6.94483	5.62859	8.75346	8.4551	7.18934	7.05465	170	121	189	195	161	156
NONRATT020635.2	NONRATT020635.2	PMID24510058	C2.6.aSep08	-	4:115828213-115840837	653	0.254718	1.01527	0.505412	0.74355	1.25305	0.563984	4	14	7	11	18	8
MSTRG.18198.1	-	-	-	-	6:10768320-10843997	1482	1.43115	2.20477	1.30437	1.39986	1.47231	1.18042	51	69	41	47	48	38
NONRATT026192.2	NONRATT026192.2	PMID24510058	tawsa.bSep08	-	7:126484987-126487072	403	0	0	0	0.328624	0.225649	0.228463	0	0	0	3	2	2
NONRATT001809.2	NONRATT001809.2	PMID24510058	Sufu.eSep08-unspliced	-	1:266240296-266241743	1448	9.27671	7.32557	11.2987	12.0104	10.0774	10.2691	323	224	347	394	321	323
ENSRNOT00000087000	ENSRNOT00000087000	ensembl:lincRNA	-	AABR07045403.1	20:46417239-46422760	694	0.299646	0.0682304	0	0.190829	0.393031	0.132666	5	1	0	3	6	2
ENSRNOT00000087002	NONRATT032995.1	ensembl	-	AABR07053635.2	3:117811504-117819053	1234	0.202218	0.345392	0.382061	0.572325	0.33156	0.298445	6	9	10	16	9	8
NONRATT013694.2	NONRATT013694.2	PMID24510058	skofa.aSep08-unspliced	-	18:15910159-15911554	1396	2.29384	1.93352	2.19531	2.33978	2.53993	2.63815	77	57	65	74	78	80
NONRATT000800.2	NONRATT000800.2	PMID24510058	gleeglo.aSep08-unspliced	-	1:135134397-135135145	749	0.721784	0.505761	0.188825	0.176817	0.121411	0.245849	13	8	3	3	2	4
NONRATT006685.2	NONRATT006685.2	PMID24510058	speemar.aSep08-unspliced	-	11:79513214-79513646	433	0.672331	1.3124	0.871153	1.3252	1.36483	1.16954	7	12	8	13	13	11
NONRATT031232.2	NONRATT031232.2	PMID24510058	blarsa.aSep08	-	7:141871461-141872373	767	0.10843	0	0	0.230184	0.0592506	0.12004	2	0	0	4	1	2
NONRATT004558.2	NONRATT004558.2	PMID24510058	klarmee.bSep08	-	10:62297514-62302054	1770	17.6687	16.5072	10.6816	12.9676	13.7658	12.1983	752	617	401	520	536	469
NONRATT010272.2	NONRATT010272.2	PMID24510058	LOC680961.aSep08	-	15:8124931-8177793	738	0.338126	0.25665	0.383343	0.299067	0.307957	0.43668	6	4	6	5	5	7
NONRATT010323.2	NONRATT010323.2	PMID24510058	bloju.aSep08-unspliced	-	15:23689723-23690086	364	1.02826	1.69127	2.20205	1.69773	1.37372	1.89712	9	13	17	14	11	15
NONRATT020915.2	NONRATT020915.2	PMID24510058	RGD1308257.dSep08	-	4:157666743-157675440	693	0.720106	1.09333	0.95248	1.40126	1.04951	1.32858	12	16	14	22	16	20
NONRATT016923.2	NONRATT016923.2	PMID24510058	nerfla.aSep08-unspliced	-	2:250467272-250468190	919	0.49777	0.927509	1.02609	1.20077	1.68178	0.701298	11	18	20	25	34	14
NONRATT010524.2	NONRATT010524.2	PMID24510058	Ppp2r2a.cSep08	-	15:43682893-43733177	789	0.896055	0.780255	0.657337	0.615384	0.979466	0.641839	17	13	11	11	17	11
NONRATT016411.2	NONRATT016411.2	PMID24510058	pawshee.aSep08	-	2:145466335-145486607	421	8.79161	7.42378	7.39141	9.01669	10.1498	7.87312	89	66	66	86	94	72
NONRATT015971.2	NONRATT015971.2	PMID24510058	Papd4.dSep08	-	2:22745441-22749149	2490	0.851792	0.855813	0.871008	1.55996	1.11363	2.01522	51	45	46	88	61	109
NONRATT019651.2	NONRATT019651.2	PMID24510058	Cops2.eSep08-unspliced	-	3:118109394-118111481	2088	0.0995948	0.181425	0.383882	8.5616	0.653125	0.374819	5	8	17	405	30	17
NONRATT028847.2	NONRATT028847.2	PMID24510058	ENTH.1.bSep08	-	8:94530410-94564881	450	0.739338	0	1.88594	1.17711	1.41426	0.613803	8	0	18	12	14	6
NONRATT014696.2	NONRATT014696.2	PMID24510058	Txnl4b.cSep08	-	19:42105942-42110179	403	0.309549	0.234997	0.234001	0.109578	0.338416	0.228463	3	2	2	1	3	2
NONRATT011188.2	NONRATT011188.2	PMID24510058	rawjer.aSep08-unspliced	-	15:102123541-102124091	551	0.0754678	0.171876	0.0855305	0.0801453	0.0824777	0.0835908	1	2	1	1	1	1
NONRATT022820.2	NONRATT022820.2	PMID24510058	Arhgef19.bSep08	-	5:159755595-159762335	384	0.108288	0.123312	0.122727	0.115	0.591854	0.599478	1	1	1	1	5	5
NONRATT000311.2	NONRATT000311.2	PMID24510058	RGD1562311.aSep08	-	1:63763816-63766461	231	0.360024	0	0.204014	0.573315	0	0.398573	2	0	1	3	0	2
NONRATT024960.2	NONRATT024960.2	PMID24510058	Itgb1bp1.eSep08	-	6:43352283-43357689	1388	1.64791	2.35408	1.66447	1.59004	2.32531	2.58703	55	69	49	50	71	78
NONRATT008742.2	NONRATT008742.2	PMID24510058	Rnpep.cSep08	-	13:52095643-52098657	792	0.73515	0.717512	0.952488	1.50478	1.3201	0.755658	14	12	16	27	23	13
NONRATT010208.2	NONRATT010208.2	PMID24510058	kleykaw.aSep08-unspliced	-	14:114174574-114175579	1006	0.496057	0.659019	1.26542	1.27243	1.0845	0.686433	12	14	27	29	24	15
NONRATT011009.2	NONRATT011009.2	PMID24510058	veyjar.aSep08-unspliced	-	15:45480525-45481230	706	0.235596	1.47562	1.9367	1.5005	1.35216	0.586884	4	22	29	24	21	9
NONRATT013132.2	NONRATT013132.2	PMID24510058	RGD1564327.bSep08	-	17:79324375-79345853	491	0	0.0964397	0.0959823	0.0899391	0.277763	0.0938055	0	1	1	1	3	1
NONRATT010193.2	NONRATT010193.2	PMID24510058	Papolg.bSep08	-	14:108635948-108638184	393	0.529145	0.240976	0.719865	0.44924	0.578301	0.702828	5	2	6	4	5	6
NONRATT003573.2	NONRATT003573.2	PMID24510058	Tmem138.eSep08	-	1:226624872-226628746	739	0.112538	0.256302	0.510432	0.358358	0.615143	0.249176	2	4	8	6	10	4
NONRATT030105.2	NONRATT030105.2	PMID24510058	Fastkd2.bSep08	-	9:70469161-70470430	325	0.383841	0.437094	0.435168	0.679112	0.699299	0.708306	3	3	3	5	5	5
NONRATT013338.2	NONRATT013338.2	PMID24510058	Paip2.fSep08	-	18:28397416-28415613	1111	1.12296	1.79016	1.73994	1.07272	1.06381	0.911588	30	42	41	27	26	22
NONRATT009051.2	NONRATT009051.2	PMID24510058	feelu.aSep08-unspliced	-	13:98723969-98724375	407	0.102169	0.116344	0.347493	0.325395	1.11693	0.226217	1	1	3	3	10	2
NONRATT031740.1	NONRATT031740.1	ensembl	-	-	11:24175417-24177645	1188	0.210048	0.119575	0.317516	0.185784	0.153053	0.11627	6	3	8	5	4	3
NONRATT003369.2	NONRATT003369.2	PMID24510058	sneyflu.aSep08	-	1:215912600-215969689	319	0.130353	0.148438	0.147734	0.138433	0.427529	0.144384	1	1	1	1	3	1
NONRATT028220.2	NONRATT028220.2	PMID24510058	Tmem42.bSep08-unspliced	-	8:132106953-132107753	801	0.778804	1.12326	1.41271	0.991916	0.964793	0.919555	15	19	24	18	17	16
NONRATT002772.2	NONRATT002772.2	PMID24510058	smoglo.aSep08-unspliced	-	1:137325459-137326247	789	0.632488	0.900285	1.61345	1.90212	1.78608	1.57538	12	15	27	34	31	27
NONRATT007963.2	NONRATT007963.2	PMID24510058	smorler.aSep08-unspliced	-	12:38498557-38499035	479	0	0	0.196873	0.0921922	0.0948752	0.384428	0	0	2	1	1	4
MSTRG.11416.1	-	-	-	-	2:41349446-41356935	7466	1.66549	2.01063	3.37225	2.79643	2.42938	3.38518	299	317	534	473	399	549
NONRATT008547.2	NONRATT008547.2	PMID24510058	blarkee.aSep08	-	13:105139760-105143311	749	0.0555177	0.12644	0.314729	0	0.121411	0.245849	1	2	5	0	2	4
NONRATT021010.2	NONRATT021010.2	PMID24510058	stazoy.aSep08-unspliced	-	4:176439421-176439785	365	0.227851	0.129731	0	0.120987	0.124507	0	2	1	0	1	1	0
NONRATT003626.2	NONRATT003626.2	PMID24510058	Rfk.bSep08-unspliced	-	1:236499786-236500537	752	1.99088	1.95213	1.94364	1.64349	2.11575	1.77533	36	31	31	28	35	29
NONRATT003767.2	NONRATT003767.2	PMID24510058	Pik3ap1.cSep08	-	1:260529170-260537909	445	0.373778	0.425635	0.953565	1.28947	0.4086	0.724202	4	4	9	13	4	7
NONRATT027766.2	NONRATT027766.2	PMID24510058	gyrar.aSep08-unspliced	-	8:64540379-64541157	779	0.0533797	0	0.0604972	0.0566882	0	0.0591252	1	0	1	1	0	1
NONRATT004265.2	NONRATT004265.2	PMID24510058	Irf1.bSep08	-	10:39109522-39110816	295	0.140959	0.481544	0.479422	0.748174	0.308259	0.624206	1	3	3	5	2	4
NONRATT023351.2	NONRATT023351.2	PMID24510058	snorvo.aSep08	-	5:101218320-101277062	713	0.0583208	0.0664122	0	0	0	0.193729	1	1	0	0	0	3
NONRATT021661.2	NONRATT021661.2	PMID24510058	sparzee.aSep08-unspliced	-	4:129546353-129546849	497	0.836756	0.666928	1.42302	1.15455	1.37196	1.75994	10	7	15	13	15	19
NONRATT021061.2	NONRATT021061.2	PMID24510058	MGC72974.dSep08	-	4:183656021-183660212	772	0.430962	0.36802	0.305352	0.400242	0.529981	0.655972	8	6	5	7	9	11
ENSRNOT00000080867	NONRATT033828.1	ensembl	-	AABR07037698.1	X:28577269-28583900	2240	0.129964	0.147975	0.252574	0.197044	0.0405967	0.164411	7	7	12	10	2	8
NONRATT011017.2	NONRATT011017.2	PMID24510058	shaja.aSep08	-	15:47139040-47211434	409	0.203339	0.23155	0.230568	0.215833	0.222339	0.225111	2	2	2	2	2	2
NONRATT002445.2	NONRATT002445.2	PMID24510058	slarfloy.aSep08-unspliced	-	1:84710693-84711408	716	0.75505	1.32274	1.38282	1.17129	0.253948	0.964457	13	20	21	19	4	15
NONRATT022688.2	NONRATT022688.2	PMID24510058	povar.aSep08	-	5:150078503-150080167	306	4.07714	3.71403	2.61943	1.44241	3.7139	1.35405	30	24	17	10	25	9
NONRATT004346.2	NONRATT004346.2	PMID24510058	doyny.aSep08-unspliced	-	10:46115477-46116016	540	0.30802	0.350755	0.960442	0.49042	0.420874	0.511502	4	4	11	6	5	6
NONRATT010113.2	NONRATT010113.2	PMID24510058	Ccdc117.aSep08	-	14:85762357-85772786	701	2.66965	3.5803	4.43907	4.09289	4.3448	4.72836	45	53	66	65	67	72
NONRATT027941.2	NONRATT027941.2	PMID24510058	meepo.aSep08-unspliced	-	8:98688525-98688788	264	0	0	0	1.00313	0	0	0	0	0	6	0	0
NONRATT003557.2	NONRATT003557.2	PMID24510058	smoykla.aSep08-unspliced	-	1:225923450-225924467	1018	2.24685	3.07015	3.4273	1.51757	2.76855	1.26619	55	66	74	35	62	28
NONRATT030867.2	NONRATT030867.2	PMID24510058	foby.aSep08	-	X:10657285-10660375	1389	1.28744	1.36369	1.52749	1.49358	1.57089	1.32574	43	40	45	47	48	40
NONRATT006188.2	NONRATT006188.2	PMID24510058	starner.aSep08-unspliced	-	10:95039272-95039790	519	0.961529	1.64235	1.27181	1.10561	0.875897	0.620944	12	18	14	13	10	7
NONRATT016142.2	NONRATT016142.2	PMID24510058	Itga1.cSep08	-	2:47209193-47224694	352	1.77222	1.34536	2.27712	1.50482	1.93711	1.43867	15	10	17	12	15	11
NONRATT009418.2	NONRATT009418.2	PMID24510058	Tapt1.bSep08	-	14:71424602-71447395	345	0	0.411755	0	0	0	0.667245	0	3	0	0	0	5
NONRATT013205.2	NONRATT013205.2	PMID24510058	dorfa.aSep08-unspliced	-	18:1643912-1644327	416	0.0999586	0.34148	0.453376	0.212201	0.327841	0.553364	1	3	4	2	3	5
NONRATT021075.2	NONRATT021075.2	PMID24510058	zoywer.aSep08	-	4:1968508-2053653	387	0.107449	0.244713	0.121776	0.570313	0.234978	0.475816	1	2	1	5	2	4
NONRATT020347.2	NONRATT020347.2	PMID24510058	Akr1b10.bSep08	-	4:61815104-61819052	372	0.223563	0.12729	1.14069	0.35601	0.733235	0.495002	2	1	9	3	6	4
NONRATT028483.2	NONRATT028483.2	PMID24510058	Phldb1.bSep08	-	8:48997790-48999576	872	0.524599	1.0318	1.83835	1.46796	2.13734	2.5341	11	19	34	29	41	48
NONRATT013582.2	NONRATT013582.2	PMID24510058	Dym.fSep08	-	18:71204692-71313031	624	0.133278	0.0758844	0.0755245	0.212237	0.145732	0.295098	2	1	1	3	2	4
NONRATT011007.2	NONRATT011007.2	PMID24510058	spojar.aSep08-unspliced	-	15:42663180-42663887	708	0.469918	0.468168	0.998931	0.872844	1.02727	0.260086	8	7	15	14	16	4
NONRATT025059.2	NONRATT025059.2	PMID24510058	bawtor.aSep08-unspliced	-	6:91117850-91118499	650	8.44543	8.52384	5.58527	9.16753	6.64384	8.21566	132	117	77	135	95	116
NONRATT003181.2	NONRATT003181.2	PMID24510058	RGD1560566.cSep08	-	1:198322275-198354466	2512	0.19866	0.678647	0.0563016	0.210867	0.560994	0.274901	12	36	3	12	31	15
NONRATT019491.2	NONRATT019491.2	PMID24510058	Accs.cSep08	-	3:82749503-82752982	403	0.103183	0.117498	0.116941	0.219046	0.112767	0.342752	1	1	1	2	1	3
NONRATT014408.2	NONRATT014408.2	PMID24510058	snerdor.aSep08-unspliced	-	19:57494924-57495621	698	0.476651	0.339197	0.540414	0.505877	0.520994	0.263812	8	5	8	8	8	4
NONRATT013219.2	NONRATT013219.2	-	-	-	18:3585235-3589554	1052	0.632514	0.585191	0.896364	0.293714	0.388921	0.612636	16	13	20	7	9	14
NONRATT016717.2	NONRATT016717.2	PMID24510058	Atp1a1.dSep08	-	2:204013874-204017631	360	13.1693	12.891	5.36966	13.4872	8.20769	10.8696	114	98	41	110	65	85
NONRATT027548.2	NONRATT027548.2	PMID24510058	snoypey.aSep08	-	8:32963988-32965795	484	0	0.195669	0.584518	0.182388	0.375675	0.0951622	0	2	6	2	4	1
NONRATT028217.2	NONRATT028217.2	PMID24510058	Zfp105.bSep08-unspliced	-	8:132008254-132009115	862	3.32892	3.46097	2.73482	3.99411	3.32236	3.41798	69	63	50	78	63	64
NONRATT024010.2	NONRATT024010.2	PMID24510058	RGD1310453.bSep08-unspliced	-	6:8672667-8673168	502	0.165668	0.0943264	0.469585	0.263816	0.271677	0.275157	2	1	5	3	3	3
MSTRG.22910.1	-	-	-	-	9:113519970-113523797	3762	0	0	0	0.574924	0	2.61875	0	0	0	49	0	214
MSTRG.2731.1	-	-	-	-	1:264106265-264109055	2769	2.1477	1.88118	0.204321	2.35923	2.18343	2.24445	143	110	12	148	133	135
NONRATT020357.2	NONRATT020357.2	PMID24510058	Agbl3.bSep08	-	4:62356946-62365390	801	0.830717	0.532102	0.76522	0.771503	0.624264	0.689666	16	9	13	14	11	12
NONRATT026570.2	NONRATT026570.2	PMID24510058	Akap8l.eSep08	-	7:14353187-14369808	416	1.79945	3.98416	6.46021	5.83579	5.9008	5.31187	18	35	57	55	54	48
NONRATT025490.2	NONRATT025490.2	PMID24510058	sharoy.aSep08	-	7:10530049-10531221	350	5.46574	5.00604	6.06195	4.9184	5.19519	5.78742	46	37	45	39	40	44
NONRATT002534.2	NONRATT002534.2	PMID24510058	Fxyd1andFxyd7.hSep08	-	1:89484310-89486455	277	0.300237	0.170945	0.170135	0.637369	0.164062	0.166276	2	1	1	4	1	1
NONRATT023988.2	NONRATT023988.2	PMID24510058	werto.aSep08-unspliced	-	6:3448166-3448842	677	0.92145	1.04922	1.04467	0.78242	1.00718	1.35998	15	15	15	12	15	20
NONRATT008969.2	NONRATT008969.2	-	-	-	13:89691840-89692606	767	0.325341	0.308682	0.553242	0.172667	0.474125	0.12004	6	5	9	3	8	2
NONRATT029541.2	NONRATT029541.2	PMID24510058	Speg.dSep08	-	9:82611942-82612737	528	0.0787552	0.0896816	0.178603	0.167189	0.0860705	0.087232	1	1	2	2	1	1
NONRATT031214.2	NONRATT031214.2	PMID24510058	Tuba1b.cSep08	-	7:140616325-140617702	312	0.799797	2.27668	0.755551	0.282935	5.68228	1.77059	6	15	5	2	39	12
NONRATT020590.2	NONRATT020590.2	PMID24510058	darzaw.aSep08-unspliced	-	4:109413755-109414287	533	0	0.0888403	0	0.414092	0.341139	0.0864137	0	1	0	5	4	1
NONRATT014391.2	NONRATT014391.2	PMID24510058	klordor.aSep08-unspliced	-	19:56615326-56617355	2030	0.430206	0.6065	0.766461	0.630573	0.447872	0.703012	21	26	33	29	20	31
NONRATT019659.2	NONRATT019659.2	PMID24510058	Trpm7.bSep08	-	3:119264591-119271030	369	0.901632	2.05332	3.32204	3.82779	1.97102	3.61801	8	16	26	32	16	29
NONRATT021579.2	NONRATT021579.2	PMID24510058	swoyzaw.aSep08-unspliced	-	4:119073234-119073628	395	0.210546	0	0.35805	0.223483	0.115051	0	2	0	3	2	1	0
NONRATT002919.2	NONRATT002919.2	PMID24510058	Eed.cSep08	-	1:154189318-154190652	978	0.892964	0.968389	1.34983	1.2186	0.790183	1.36508	21	20	28	27	17	29
NONRATT021502.2	NONRATT021502.2	PMID24510058	Tcf3.bSep08	-	4:100493726-100497412	820	0.202843	0.0577462	0.287478	0.430613	0.554378	0.280731	4	1	5	8	10	5
NONRATT007745.2	NONRATT007745.2	PMID24510058	Bud31.aSep08	-	12:11232964-11240390	803	10.6687	2.7717	1.70275	7.14593	9.79357	1.14658	206	47	29	130	173	20
NONRATT023344.2	NONRATT023344.2	PMID24510058	kawvoy.aSep08-unspliced	-	5:100433268-100436427	3160	26.9922	26.09	32.8397	39.3208	34.8704	39.1015	2051	1741	2201	2815	2424	2684
NONRATT010771.2	NONRATT010771.2	PMID24510058	buju.aSep08-unspliced	-	15:12981638-12981921	284	0.292836	1.33386	1.16209	0.932489	1.12045	0.810561	2	8	7	6	7	5
NONRATT020349.2	NONRATT020349.2	PMID24510058	LOC689357.aSep08-unspliced	-	4:62119749-62120099	351	0.710931	0.674528	1.07467	1.1318	1.03605	0.786927	6	5	8	9	8	6
NONRATT013763.2	NONRATT013763.2	PMID24510058	Cd14.cSep08	-	18:29530042-29561385	315	0.528035	0.300647	0.299372	0.140191	0	1.46144	4	2	2	1	0	10
NONRATT010090.2	NONRATT010090.2	PMID24510058	Osbp2.fSep08-unspliced	-	14:84022542-84022773	232	0	0	0.203135	0.190345	0.195885	0.198528	0	0	1	1	1	1
NONRATT018199.2	NONRATT018199.2	-	-	-	3:51918781-52103000	402	0.413759	0.353372	0.586398	0.549033	0.904612	0.458062	4	3	5	5	8	4
NONRATT001599.2	NONRATT001599.2	PMID24510058	fleekly.aSep08-unspliced	-	1:238855066-238856391	1326	0.595892	0.892793	1.92007	0.399471	0.514225	0.277739	19	25	54	12	15	8
NONRATT024881.2	NONRATT024881.2	PMID24510058	Seli.cSep08-unspliced	-	6:27472447-27473103	657	5.25378	4.61295	3.87522	3.56075	3.6671	3.22324	83	64	54	53	53	46
NONRATT019379.2	NONRATT019379.2	PMID24510058	Gpr155.cSep08	-	3:60056335-60059613	587	0.212518	0.161335	0.080285	0.0752301	0.0774194	0.0784643	3	2	1	1	1	1
NONRATT029782.2	NONRATT029782.2	PMID24510058	RGD1307182.aSep08	-	9:14653604-14654247	403	0.103183	0.352495	0.234001	0.109578	0.338416	0.228463	1	3	2	1	3	2
NONRATT024718.2	NONRATT024718.2	PMID24510058	feyto.aSep08	-	6:137998979-138002895	866	0.0960341	0.0546788	0.163314	0.101935	0.0524771	0.159502	2	1	3	2	1	3
MSTRG.10312.2	-	-	-	-	18:60410734-60417301	6544	1.0168	1.20123	3.14131	2.88015	3.45937	3.53852	160	166	436	427	498	503
NONRATT023690.2	NONRATT023690.2	PMID24510058	Zdhhc18.bSep08	-	5:151850102-151856191	425	0.195684	0.891329	0.554663	0.415415	0.962694	0.325009	2	8	5	4	9	3
NONRATT029890.2	NONRATT029890.2	PMID24510058	boynoy.aSep08	-	9:37242367-37244308	490	0.0848628	0.0966365	0.0961782	0.0901226	0.0927453	0.093997	1	1	1	1	1	1
NONRATT028608.2	NONRATT028608.2	PMID24510058	Neil1.cSep08	-	8:61817856-61819421	741	0.785748	1.02251	0.699917	0.953103	1.10424	1.05617	14	16	11	16	18	17
MSTRG.21290.2	-	-	-	-	8:68669179-68677378	8178	2.01885	0.648531	0.167194	0	0	4.71168	397	112	29	0	0	837
NONRATT031224.2	NONRATT031224.2	PMID24510058	party.aSep08-unspliced	-	7:141122167-141122555	389	0.213793	0.121727	0.12115	0	0.23377	0.236685	2	1	1	0	2	2
NONRATT005702.2	NONRATT005702.2	-	-	-	10:64341114-64343685	1190	1.29304	1.63153	2.17911	2.63356	3.0178	2.82407	37	41	55	71	79	73
NONRATT023285.2	NONRATT023285.2	PMID24510058	Rod1.cSep08	-	5:76717798-76756125	368	0.904082	0.257347	0.640576	0.479759	0.741205	1.12592	8	2	5	4	6	9
NONRATT022653.2	NONRATT022653.2	PMID24510058	smeewo.aSep08-unspliced	-	5:146946733-146947772	1040	7.15781	8.19597	6.48289	4.54129	10.6652	4.69214	179	180	143	107	244	106
NONRATT026106.2	NONRATT026106.2	PMID24510058	plusor.aSep08-unspliced	-	7:120391529-120392617	1089	2.36769	2.52208	2.33794	1.9861	1.83668	2.07139	62	58	54	49	44	49
NONRATT018292.2	NONRATT018292.2	-	-	-	3:65815748-65864548	713	4.14123	3.45363	5.6869	5.75738	4.59043	6.19842	71	52	86	93	72	96
ENSRNOT00000080771	NONRATT032759.1	ensembl	-	AABR07013157.1	2:225170643-225171830	587	0.0708395	0.242003	0.160651	0.225614	0.232337	0.0784643	1	3	2	3	3	1
NONRATT030921.2	NONRATT030921.2	PMID24510058	LOC685095.aSep08	-	X:20733569-20775354	1351	0.0307792	0.0350495	0.0348833	0.032687	0.0336382	0.0681498	1	1	1	1	1	2
NONRATT013936.2	NONRATT013936.2	PMID24510058	byfee.aSep08-unspliced	-	18:76770762-76771424	663	0.689971	0.357103	1.13781	1.33152	1.09699	1.24982	11	5	16	20	16	18
ENSRNOT00000081689	ENSRNOT00000081689	ensembl:lincRNA	-	AABR07028908.2	10:106078-120050	6316	0.197531	0.239923	0.328453	0.307497	0.2735	0.262399	30	32	44	44	38	36
NONRATT009880.2	NONRATT009880.2	PMID24510058	barky.aSep08-unspliced	-	14:42763919-42764692	774	1.02087	0.97891	1.7056	1.82488	1.7032	1.78437	19	16	28	32	29	30
NONRATT012423.2	NONRATT012423.2	PMID24510058	Tubb2a.dSep08-unspliced	-	17:31494163-31494932	770	1.24224	1.10699	0.489882	0.68792	1.29879	0.657676	23	18	8	12	22	11
NONRATT006484.2	NONRATT006484.2	PMID24510058	Ttc3.cSep08	-	11:34613088-34616941	366	0	0.38813	0.515313	0.24119	0.24846	0.62896	0	3	4	2	2	5
NONRATT006128.2	NONRATT006128.2	PMID24510058	peener.aSep08-unspliced	-	10:91678481-91678858	378	0.110007	0.12527	0.249477	0.116826	0.601249	0.36542	1	1	2	1	5	3
NONRATT005734.2	NONRATT005734.2	PMID24510058	Rab11fip4.cSep08	-	10:66942526-66970908	380	0.109428	0.12461	0.248164	0.116211	0.119593	0.121207	1	1	2	1	1	1
NONRATT003169.2	NONRATT003169.2	PMID24510058	Cln3.dSep08	-	1:197991861-197997293	801	0.467272	0.886798	0.941786	1.32254	0.624264	0.977056	9	15	16	24	11	17
NONRATT018568.2	NONRATT018568.2	PMID24510058	chychy.aSep08	-	3:119534229-119542090	371	0.560523	0.510532	0.635396	0.475879	0.735211	0.372315	5	4	5	4	6	3
NONRATT020103.2	NONRATT020103.2	-	-	-	4:2584883-2590735	465	0.804914	0.610992	0.50695	0.56952	0.488757	0.396002	9	6	5	6	5	4
NONRATT018630.2	NONRATT018630.2	PMID24510058	pleysha.aSep08-unspliced	-	3:124085298-124086231	934	0.178085	0.202792	0.403864	0.236308	0.292038	0.14789	4	4	8	5	6	3
NONRATT019593.2	NONRATT019593.2	PMID24510058	Plcb2.aSep08	-	3:110503566-110504495	393	0.211617	0.240976	0.119917	0.22462	0.347027	0.585749	2	2	1	2	3	5
NONRATT009896.2	NONRATT009896.2	PMID24510058	N4bp2.aSep08	-	14:44059599-44067990	293	0.425762	0.323221	0.643702	0.753281	0.775673	0.942701	3	2	4	5	5	6
NONRATT022660.2	NONRATT022660.2	PMID24510058	stuwo.aSep08-unspliced	-	5:147608389-147609162	774	0.0537245	0.0611781	0.060888	0.0570544	0.0587147	0.0595071	1	1	1	1	1	1
NONRATT023172.2	NONRATT023172.2	PMID24510058	Vcp.cSep08-unspliced	-	5:58426731-58427520	790	1.78984	1.25878	1.6114	1.50859	0.920643	0.757571	34	21	27	27	16	13
NONRATT010599.2	NONRATT010599.2	PMID24510058	glawja.aSep08	-	15:57843166-57845340	266	0	0.178015	0	0	0.341867	0	0	1	0	0	2	0
NONRATT002168.2	NONRATT002168.2	PMID24510058	worfler.aSep08-unspliced	-	1:53027721-53028432	712	3.21249	4.32312	4.37048	5.76547	4.85225	6.59506	55	65	66	93	76	102
NONRATT028669.2	NONRATT028669.2	PMID24510058	reerar.aSep08-unspliced	-	8:67453209-67454086	878	0.426293	0.161795	0.268487	0.201083	0.207092	0.157322	9	3	5	4	4	3
NONRATT013697.2	NONRATT013697.2	PMID24510058	snufa.aSep08-unspliced	-	18:16466951-16467650	700	2.13877	1.82656	2.62682	1.82866	1.88326	2.03874	36	27	39	29	29	31
NONRATT005858.2	NONRATT005858.2	PMID24510058	lanaw.aSep08-unspliced	-	10:73819477-73820391	915	15.5441	16.0954	14.5825	14.2791	13.2648	13.3832	342	311	283	296	267	266
NONRATT009997.2	NONRATT009997.2	PMID24510058	Ppp2r2c.bSep08	-	14:78698697-78702537	413	0.201369	0.114653	0.11411	0.320667	0.220185	0.111522	2	1	1	3	2	1
NONRATT023790.2	NONRATT023790.2	PMID24510058	bluwaw.aSep08-unspliced	-	5:160020993-160021458	466	0.178467	0.203227	0.404731	0.284197	0.585329	0.395152	2	2	4	3	6	4
NONRATT028004.2	NONRATT028004.2	PMID24510058	Rpl29.bSep08	-	8:115131458-115133401	774	12.0356	6.97473	0.243675	1.19757	3.64133	0.0595071	224	114	4	21	62	1
NONRATT021477.2	NONRATT021477.2	PMID24510058	LOC679585.dSep08	-	4:99120018-99120729	712	36.8561	32.7225	28.0771	20.0861	27.1982	21.1429	631	492	424	324	426	327
NONRATT027271.2	NONRATT027271.2	PMID24510058	Twf1.bSep08	-	7:135838652-135843924	1541	1.75416	1.38285	0.856675	1.43217	0.737477	0.926097	65	45	28	50	25	31
NONRATT029190.2	NONRATT029190.2	PMID24510058	Klhdc3.iSep08-unspliced	-	9:16614586-16614949	364	1.14249	1.43109	1.6839	2.06144	3.37195	2.15006	10	11	13	17	27	17
NONRATT009082.2	NONRATT009082.2	PMID24510058	rolu.aSep08-unspliced	-	13:100899854-100900744	891	1.02683	0.744077	0.952495	0.891723	0.867339	1.03334	22	14	18	18	17	20
NONRATT024561.2	NONRATT024561.2	PMID24510058	snawtu.aSep08	-	6:123585553-123590621	376	0	0.125936	0.250804	0.234775	0.120865	0.244868	0	1	2	2	1	2
NONRATT001763.2	NONRATT001763.2	PMID24510058	skawklar.aSep08-unspliced	-	1:264706739-264707353	615	0.540979	0.30798	1.45659	0.287075	0.739171	1.19766	8	4	19	4	10	16
NONRATT010324.2	NONRATT010324.2	PMID24510058	flaju.aSep08-unspliced	-	15:23844173-23844804	632	0.394837	0.374619	0.372993	0.488903	0.359608	0.291362	6	5	5	7	5	4
NONRATT030909.2	NONRATT030909.2	PMID24510058	Spin2.aSep08	-	X:18440758-18457451	714	0.8737	0.663257	1.32069	0.432755	0.318308	0.709259	15	10	20	7	5	11
NONRATT010585.2	NONRATT010585.2	PMID24510058	Rcbtb2.fSep08	-	15:55043607-55055108	1137	0.76809	0.291524	0.414656	0.465873	0.279867	0.323906	21	7	10	12	7	8
NONRATT012337.2	NONRATT012337.2	PMID24510058	klarfor.aSep08-unspliced	-	17:15967634-15968031	398	0	0.118975	0	0	0.114184	0.115725	0	1	0	0	1	1
ENSRNOT00000080614	ENSRNOT00000080614	ensembl:lincRNA	-	AABR07060341.1	4:68424505-68426608	668	0.186749	0.212658	0.141171	0.264298	0.204164	0.20678	3	3	2	4	3	3
NONRATT014246.2	NONRATT014246.2	PMID24510058	Wwp2.fSep08	-	19:39561799-39575363	393	0.211617	0.240976	0.239955	0.336986	0.347027	0.351473	2	2	2	3	3	3
NONRATT010880.2	NONRATT010880.2	PMID24510058	Zfhx2.bSep08	-	15:33729325-33731472	395	0.105273	0.119878	0.35805	0.111798	0.34527	0.23309	1	1	3	1	3	2
NONRATT030773.2	NONRATT030773.2	PMID24510058	kerby.aSep08	-	X:123772428-123773474	1047	8.30155	10.4026	12.2037	8.09442	6.29551	10.9923	209	230	271	192	145	250
NONRATT009504.2	NONRATT009504.2	PMID24510058	sheeko.aSep08-unspliced	-	14:83253244-83253572	329	0.505565	0.86356	0.71651	0.53663	0.552665	0.839548	4	6	5	4	4	6
NONRATT015414.2	NONRATT015414.2	PMID24510058	moblee.aSep08-unspliced	-	2:187683519-187683874	356	1.40178	0.665054	1.19196	1.36387	0.638405	0.51725	12	5	9	11	5	4
NONRATT019165.2	NONRATT019165.2	-	-	-	3:10389514-10390331	381	0.436564	0.124283	0.618719	0.579295	0.238678	0.483309	4	1	5	5	2	4
ENSRNOT00000087041	NONRATT032745.1	ensembl	-	AABR07012023.1	2:182712194-182717296	428	0.097156	0	0.330443	0.103178	0.10618	0.107613	1	0	3	1	1	1
NONRATT023959.2	NONRATT023959.2	-	-	-	5:173646050-173647542	1014	0.451135	0.420329	0.650955	0.957669	1.07594	0.862616	11	9	14	22	24	19
NONRATT013853.2	NONRATT013853.2	PMID24510058	doyfar.aSep08-unspliced	-	18:56968115-56969908	1794	0	2.87717	0	0	0	0	0	109	0	0	0	0
NONRATT000271.2	NONRATT000271.2	PMID24510058	blorfley.aSep08-unspliced	-	1:64181009-64181672	664	0.187874	0.142626	0.355018	0.132945	0.0684416	0.13866	3	2	5	2	1	2
NONRATT028322.2	NONRATT028322.2	PMID24510058	Cdc37.dSep08	-	8:22154510-22164745	1374	1.05936	0.24124	0	1.15651	0	0.603081	35	7	0	36	0	18
NONRATT019513.2	NONRATT019513.2	PMID24510058	porchy.bSep08-unspliced	-	3:92725186-92726335	1150	0.940237	0.782376	1.22995	1.30502	1.89736	0.880674	26	19	30	34	48	22
NONRATT012062.2	NONRATT012062.2	PMID24510058	Ppapdc1b.eSep08	-	16:71121194-71125293	1026	0.081058	0	0.183825	0.215118	0.221513	0.224366	2	0	4	5	5	5
NONRATT022932.2	NONRATT022932.2	PMID24510058	meewer.aSep08-unspliced	-	5:173209949-173210879	931	2.72484	2.39063	2.9373	3.46103	3.66204	2.71961	61	47	58	73	75	55
NONRATT021337.2	NONRATT021337.2	PMID24510058	stazy.aSep08-unspliced	-	4:64865710-64868509	2800	22.3531	21.411	23.8436	25.7588	25.5864	28.3944	1505	1266	1416	1634	1576	1727
NONRATT030782.2	NONRATT030782.2	PMID24510058	Mcts1.dSep08	-	X:124895773-124906125	658	1.01125	0.791668	0.286633	0.335427	0.898134	0.979473	16	11	4	5	13	14
NONRATT007563.2	NONRATT007563.2	-	-	-	12:41415068-41416057	990	0.0840056	0.191321	0.0476033	0	0.0459043	0.139524	2	4	1	0	1	3
NONRATT028198.2	NONRATT028198.2	PMID24510058	Zfp651.aSep08	-	8:130402616-130404612	504	0.330022	0.281856	0.748431	0.437919	0.631366	0.639424	4	3	8	5	7	7
NONRATT030526.2	NONRATT030526.2	PMID24510058	Sat1.cSep08	-	X:43626609-43629765	1145	55.7523	95.619	49.7014	70.8551	88.6134	74.4618	1535	2312	1207	1838	2232	1852
NONRATT019370.2	NONRATT019370.2	PMID24510058	jochy.aSep08	-	3:58074397-58084497	492	0	0.192487	0	0.0897562	0	0.187135	0	2	0	1	0	2
NONRATT027453.2	NONRATT027453.2	PMID24510058	RGD1309410.bSep08	-	8:14029536-14079750	752	3.92646	3.52639	3.88721	0.880438	4.171	9.06031	71	56	62	15	69	148
NONRATT004755.2	NONRATT004755.2	PMID24510058	shoynaw.aSep08-unspliced	-	10:81728275-81729063	789	1.10687	2.22068	1.73297	1.45453	1.95887	1.2253	21	37	29	26	34	21
NONRATT030872.2	NONRATT030872.2	PMID24510058	Mid1ip1.bSep08	-	X:13115939-13116773	350	0.475232	0.811746	0.67352	0	0.779324	0.394654	4	6	5	0	6	3
NONRATT019385.2	NONRATT019385.2	PMID24510058	Chn1.hSep08-unspliced	-	3:60555517-60555993	477	0.174351	0.19854	0.0987994	0.370128	0.285916	0.289578	2	2	1	4	3	3
NONRATT004565.2	NONRATT004565.2	PMID24510058	snorno.aSep08-unspliced	-	10:62635641-62638976	3336	18.4375	18.2974	17.7796	19.4237	19.1316	20.0787	1479	1289	1258	1468	1404	1455
NONRATT020743.2	NONRATT020743.2	PMID24510058	Slc25a26.dSep08	-	4:126604097-126615402	571	0.145649	0.082928	0.0825347	0.231936	0.477694	0.161244	2	1	1	3	6	2
NONRATT000884.2	NONRATT000884.2	-	-	-	X:153014683-153019256	352	0.472531	0.403567	0.401789	0.376238	0.516554	0.130848	4	3	3	3	4	1
NONRATT021008.2	NONRATT021008.2	PMID24510058	snerzoy.aSep08-unspliced	-	4:176297886-176298291	406	3.89238	7.34816	11.0323	8.37135	7.94959	6.69002	38	63	95	77	71	59
NONRATT020209.2	NONRATT020209.2	PMID24510058	Gatad1.dSep08	-	4:27647186-27648304	626	0.531473	0.529494	0.602571	0.0705433	0.580917	0.661885	8	7	8	1	8	9
NONRATT028980.2	NONRATT028980.2	PMID24510058	blurey.aSep08-unspliced	-	8:116582785-116583163	379	1.53625	1.99915	4.35401	5.12441	3.71825	3.40102	14	16	35	44	31	28
NONRATT030467.2	NONRATT030467.2	PMID24510058	shorbo.aSep08-unspliced	-	X:18493452-18494404	953	1.2655	1.9379	1.78106	1.34319	1.66951	1.35256	29	39	36	29	35	28
NONRATT022308.2	NONRATT022308.2	PMID24510058	morvor.aSep08-unspliced	-	5:76999770-77001734	1965	4.02115	2.89188	4.77482	4.53752	4.32603	4.31075	190	120	199	202	187	184
NONRATT010836.2	NONRATT010836.2	PMID24510058	Zfp219.cSep08	-	15:28405128-28416916	668	1.24511	1.63045	0.705784	1.85015	0.204164	1.44725	20	23	10	28	3	21
NONRATT022178.2	NONRATT022178.2	PMID24510058	Rars2.dSep08	-	5:50114205-50114907	368	0.904082	0.772041	1.28115	0.599759	0.494095	1.50115	8	6	10	5	4	12
NONRATT001984.2	NONRATT001984.2	PMID24510058	kloflar.aSep08-unspliced	-	1:15890540-15891022	483	9.55729	7.25513	12.2019	11.6975	9.88216	14.6782	111	74	125	128	105	154
NONRATT016819.2	NONRATT016819.2	PMID24510058	Ptbp2.eSep08	-	2:223263312-223285571	933	3.12017	2.43626	3.9922	2.69664	3.94654	3.20724	70	48	79	57	81	65
NONRATT018861.2	NONRATT018861.2	PMID24510058	Gdap1l1.eSep08	-	3:159842137-159843237	552	0	0.257347	0	0	0	0	0	3	0	0	0	0
NONRATT002898.2	NONRATT002898.2	PMID24510058	jorbor.aSep08-unspliced	-	X:157236343-157238730	2388	0.0870829	0.19831	0.315901	0.573006	0.380729	0.655462	5	10	16	31	20	34
NONRATT030071.2	NONRATT030071.2	PMID24510058	Sumo1.bSep08	-	9:66453936-66483692	769	5.57018	8.25166	8.15441	7.1175	7.44826	4.96878	103	134	133	124	126	83
NONRATT025287.2	NONRATT025287.2	PMID24510058	spawtu.aSep08	-	6:125765057-125776379	212	0.196145	0.223358	0.444822	0.416394	0.64331	0.868589	1	1	2	2	3	4
NONRATT020753.2	NONRATT020753.2	PMID24510058	leewey.aSep08	-	4:133344178-133346114	596	0.209309	0	0.0790726	0	0	0	3	0	1	0	0	0
NONRATT000620.2	NONRATT000620.2	PMID24510058	LOC690000.bSep08	-	1:94574272-94585205	455	13.9843	11.8647	13.3673	19.0141	11.4894	12.4449	153	114	129	196	115	123
MSTRG.22980.2	-	-	-	-	KL567881.1:8220-8877	634	1.18071	3.21171	6.09804	3.41146	2.07931	3.34017	18	43	82	49	29	46
NONRATT005389.2	NONRATT005389.2	PMID24510058	Ltc4s.cSep08-unspliced	-	10:35737594-35737885	292	0.142407	0.324328	0.322953	0.302314	0.155634	0.630619	1	2	2	2	1	4
NONRATT018351.2	NONRATT018351.2	PMID24510058	Rapsn.cSep08	-	3:79868775-79869484	398	0.104479	0.237949	0.355351	0.221798	0.228484	0.57839	1	2	3	2	2	5
NONRATT030065.2	NONRATT030065.2	PMID24510058	Als2cr4.bSep08	-	9:65902247-65916780	752	0.82955	0.440775	0.376206	0.176111	0.544076	1.04072	15	7	6	3	9	17
NONRATT003182.2	NONRATT003182.2	PMID24510058	RGD1560566.dSep08-unspliced	-	1:198323487-198324223	737	1.41071	2.18461	1.66328	1.43738	1.542	2.1238	25	34	26	24	25	34
NONRATT006881.2	NONRATT006881.2	PMID24510058	fawmy.aSep08-unspliced	-	11:32298678-32299118	441	0	0.107374	0.106865	0.200171	0.206205	0.208776	0	1	1	2	2	2
NONRATT028042.2	NONRATT028042.2	PMID24510058	Impdh2.eSep08-unspliced	-	8:117350067-117350969	903	1.56586	1.31101	0.939837	1.07539	0.956467	0.76473	34	25	18	22	19	15
NONRATT019238.2	NONRATT019238.2	PMID24510058	Ndufa8.dSep08-unspliced	-	3:15376299-15376607	309	0.538288	0.459727	0.457701	0.285682	0.588437	0.447019	4	3	3	2	4	3
NONRATT003532.2	NONRATT003532.2	-	-	-	1:222619974-222620671	395	0.631739	0.599391	1.31301	0.89393	1.61118	1.16545	6	5	11	8	14	10
NONRATT000344.2	NONRATT000344.2	PMID24510058	RGD1566307.aSep08	-	1:73609857-73611686	652	0.701611	0.363128	0.289271	0.67696	0.139473	0.776703	11	5	4	10	2	11
NONRATT023746.2	NONRATT023746.2	PMID24510058	forwaw.aSep08-unspliced	-	5:155727770-155728233	464	0.806649	0.306154	0.609713	0.760996	0.881778	0.892975	9	3	6	8	9	9
NONRATT026678.2	NONRATT026678.2	PMID24510058	slyroy.aSep08	-	7:32980271-32981818	415	1.20249	1.36932	2.49946	2.12723	2.40981	0.776554	12	12	22	20	22	7
NONRATT030894.2	NONRATT030894.2	PMID24510058	Wdr45.dSep08-unspliced	-	X:15623204-15624470	1267	1.674	2.01826	2.86537	2.19478	2.3321	2.5071	51	54	77	63	65	69
NONRATT012393.2	NONRATT012393.2	PMID24510058	Slc35b3.eSep08	-	17:26485240-26495411	727	0.514835	0.1954	0	0.182167	0.250106	0.759866	9	3	0	3	4	12
NONRATT015909.2	NONRATT015909.2	PMID24510058	Gpr177.dSep08-unspliced	-	2:266315013-266316297	1285	17.7676	16.9518	4.58641	22.7741	3.2546	25.3646	549	460	125	663	92	708
NONRATT003508.2	NONRATT003508.2	PMID24510058	swarflu.bSep08	-	1:222179452-222179693	242	0.343659	0.978344	0.389679	0.364775	0.375771	0.951237	2	5	2	2	2	5
NONRATT030263.2	NONRATT030263.2	PMID24510058	Hjurp.aSep08	-	9:95350721-95352856	775	0.482948	0	0.60834	0	0.175976	0.415832	9	0	10	0	3	7
NONRATT010219.2	NONRATT010219.2	PMID24510058	RGD1306508.cSep08	-	14:115315074-115318343	528	0.787628	0.896904	1.07153	1.08677	1.20534	0.959111	10	10	12	13	14	11
NONRATT030390.2	NONRATT030390.2	PMID24510058	rawpey.aSep08-unspliced	-	9:119594047-119594920	874	1.28473	0.216713	0.377613	0.959543	0.312086	0.790105	27	4	7	19	6	15
NONRATT006617.2	NONRATT006617.2	PMID24510058	LOC360721.fSep08	-	11:67618711-67623924	589	1.34152	0.804016	1.04065	1.19906	1.0805	1.17241	19	10	13	16	14	15
NONRATT004444.2	NONRATT004444.2	PMID24510058	Trp53.fSep08	-	10:56187064-56195108	1233	1.45033	2.26594	1.45308	1.96893	2.47016	1.90415	43	59	38	55	67	51
NONRATT026143.2	NONRATT026143.2	PMID24510058	keesoy.aSep08-unspliced	-	7:122835399-122835719	321	1.55462	1.47528	2.35006	1.92515	2.83234	2.43807	12	10	16	14	20	17
NONRATT021202.2	NONRATT021202.2	PMID24510058	floywoy.aSep08-unspliced	-	4:27778687-27779357	671	13.5732	13.2678	13.0694	16.2482	18.0206	14.6135	219	188	186	247	266	213
NONRATT002595.2	NONRATT002595.2	PMID24510058	Spib.aSep08-unspliced	-	1:100531538-100533181	1644	0.0758809	0.0576057	0.0573615	0.214782	0.0553142	0.140024	3	2	2	8	2	5
ENSRNOT00000090990	NONRATT033592.1	ensembl	-	AABR07069235.1	8:14192030-14201068	329	0.505565	0.143927	0	0.268315	0	0	4	1	0	2	0	0
NONRATT004656.2	NONRATT004656.2	PMID24510058	lanar.aSep08-unspliced	-	10:67864310-67865868	1559	0.506833	0.698614	1.11897	0.679507	0.437372	0.502002	19	23	37	24	15	17
NONRATT018366.2	NONRATT018366.2	PMID24510058	jorchey.aSep08-unspliced	-	3:80650587-80650962	376	0.331777	0.377808	0.87775	0.586998	0.604447	1.10197	3	3	7	5	5	9
NONRATT029542.2	NONRATT029542.2	PMID24510058	Speg.gSep08	-	9:82614629-82615504	369	0.11269	0	0.127716	0.239229	0.24644	0.12482	1	0	1	2	2	1
NONRATT010852.2	NONRATT010852.2	-	-	-	15:33182139-33183469	900	0.138609	0.0526132	0.314341	0.0490667	0.20203	0.153477	3	1	6	1	4	3
NONRATT011564.2	NONRATT011564.2	PMID24510058	morgor.aSep08-unspliced	-	16:63323529-63324256	728	0.228477	0.455306	0.712416	0.788205	0.499525	0.12647	4	7	11	13	8	2
ENSRNOT00000090676	NONRATT031509.1	ensembl	-	AABR07001926.2	1:62207548-62223307	668	0.124499	0.070886	0.211721	0.264298	0	0.13783	2	1	3	4	0	2
NONRATT000581.2	NONRATT000581.2	PMID24510058	Nfkbid.aSep08	-	1:88884749-88887298	788	0.633291	0.300456	0.658171	0.560124	0.403818	0.584203	12	5	11	10	7	10
NONRATT002006.2	NONRATT002006.2	PMID24510058	Ctgf.bSep08-unspliced	-	1:21852793-21853539	747	4.73212	5.76875	1.32544	2.42265	2.12991	3.45116	85	91	21	41	35	56
NONRATT028242.2	NONRATT028242.2	PMID24510058	warfley.aSep08-unspliced	-	8:4056064-4057937	1874	0.82109	0.884423	0.478015	0.753711	0.849009	0.663273	37	35	19	32	35	27
NONRATT022521.2	NONRATT022521.2	PMID24510058	Ipp.cSep08-unspliced	-	5:135386910-135387665	756	0.990172	0.438443	0.623629	0.642246	0.60131	0.791642	18	7	10	11	10	13
NONRATT004476.2	NONRATT004476.2	PMID24510058	veynu.aSep08-unspliced	-	10:56651312-56651701	390	0.213245	0.121415	0.483602	0.113231	0.116526	0.354177	2	1	4	1	1	3
NONRATT004685.2	NONRATT004685.2	PMID24510058	Car4.dSep08-unspliced	-	10:72272029-72272630	602	0.345439	0.786654	0.939811	0.36663	0.679643	0.458823	5	10	12	5	9	6
NONRATT009387.2	NONRATT009387.2	-	-	-	14:59301713-59302961	1002	2.03369	2.9774	0.470523	1.76208	1.63322	1.97559	49	63	10	40	36	43
NONRATT007742.2	NONRATT007742.2	PMID24510058	Zfp655.eSep08	-	12:11140745-11144763	396	3.88566	5.14198	3.80995	3.34388	4.47694	5.11514	37	43	32	30	39	44
NONRATT031259.2	NONRATT031259.2	PMID24510058	Sept6.bSep08	-	X:123524951-123554749	1697	0.17155	0.111613	0.083341	0.0780411	0.294659	0.325529	7	4	3	3	11	12
ENSRNOT00000079820	NONRATT031577.1	ensembl	-	AC099449.1	1:215908373-215986959	1008	0.536325	0.657711	0.888691	0.525494	0.360768	0.730718	13	14	19	12	8	16
NONRATT009168.2	NONRATT009168.2	PMID24510058	DAGK_cat.0.bSep08	-	14:2079502-2079996	285	0.291809	0.498441	0.496244	0.464687	0.319075	0.323054	2	3	3	3	2	2
NONRATT030413.2	NONRATT030413.2	PMID24510058	deeby.aSep08-unspliced	-	X:3684579-3685524	946	2.24203	3.45398	1.79423	1.9597	1.87407	1.94657	51	69	36	42	39	40
NONRATT001885.2	NONRATT001885.2	-	-	-	1:276715771-276721735	699	0.41648	0.406454	0.337242	0.189464	0.520249	0.461044	7	6	5	3	8	7
NONRATT006876.2	NONRATT006876.2	PMID24510058	Cryzl1.cSep08	-	11:31848377-31850915	1699	0.514019	0.780427	1.52628	0.857336	0.775915	1.02966	21	28	55	33	29	38
NONRATT002743.2	NONRATT002743.2	-	-	-	1:126147672-126153300	852	0.976215	1.55627	2.37955	0.725321	1.3872	0.91857	20	28	43	14	26	17
NONRATT003000.2	NONRATT003000.2	PMID24510058	chorflu.bSep08	-	1:167076034-167090799	414	0.502304	0.571883	0.455567	0.426452	0.439195	0.222392	5	5	4	4	4	2
NONRATT010079.2	NONRATT010079.2	PMID24510058	glako.aSep08-unspliced	-	14:83565147-83565543	397	0.41897	0.238548	0.356246	0.444713	0.343531	0.463831	4	2	3	4	3	4
NONRATT011131.2	NONRATT011131.2	PMID24510058	Pcdh9.aSep08	-	15:77103536-77169989	364	0.114238	0	0.259072	0.242515	0.124849	0	1	0	2	2	1	0
NONRATT017268.2	NONRATT017268.2	PMID24510058	Pfkl.cSep08-unspliced	-	20:11414264-11414952	689	0.181057	0.343628	0.273737	0.384364	0.329858	0.200477	3	5	4	6	5	3
NONRATT006199.2	NONRATT006199.2	PMID24510058	beyney.aSep08-unspliced	-	10:95490986-95491470	485	0.428771	0.878791	2.13872	1.54714	0.843598	2.46787	5	9	22	17	9	26
NONRATT025350.2	NONRATT025350.2	PMID24510058	warvu.aSep08-unspliced	-	6:136044784-136045282	499	1.58347	2.84699	2.07871	1.85755	3.55285	2.02961	19	30	22	21	39	22
NONRATT008441.2	NONRATT008441.2	PMID24510058	verkee.aSep08	-	13:88536811-88547691	1337	0.124406	0.141666	0.105781	0.165079	0.204012	0.103313	4	4	3	5	6	3
NONRATT028143.2	NONRATT028143.2	PMID24510058	gleeror.aSep08-unspliced	-	8:127575288-127576715	1428	6.58173	8.72146	3.79697	5.65658	5.31619	5.73838	226	263	115	183	167	178
NONRATT001830.2	NONRATT001830.2	PMID24510058	soyklaw.aSep08-unspliced	-	1:266649680-266650728	1049	0.19824	0.27084	0.314618	0.420761	0.433356	0.482756	5	6	7	10	10	11
NONRATT025471.2	NONRATT025471.2	PMID24510058	gasy.aSep08-unspliced	-	7:2972708-2973798	1091	0	0	0.0431964	0.0404767	0.0416546	0.0843909	0	0	1	1	1	2
NONRATT000429.2	NONRATT000429.2	-	-	-	1:80113941-80114540	426	0.488155	0.333464	0.553361	0.414439	0.213466	0.324246	5	3	5	4	2	3
NONRATT029720.2	NONRATT029720.2	PMID24510058	ORF19.dSep08	-	9:113923656-113926941	474	0.701904	1.09898	1.29312	0.744942	1.05493	0.582724	8	11	13	8	11	6
NONRATT012266.2	NONRATT012266.2	PMID24510058	Ddx41.eSep08	-	17:9632657-9633126	368	0.225993	0.386021	0.38432	0.479759	0.24711	0.250191	2	3	3	4	2	2
NONRATT002753.2	NONRATT002753.2	-	-	-	1:131169875-131171146	1272	0.0326908	0.0372263	0	0.034717	0.0357274	0	1	1	0	1	1	0
NONRATT013283.2	NONRATT013283.2	PMID24510058	Iws1.bSep08	-	18:24861719-24865116	733	3.17718	0.710665	0	0	1.73647	0.565266	56	11	0	0	28	9
NONRATT007344.2	NONRATT007344.2	PMID24510058	smolaw.aSep08-unspliced	-	12:19033151-19034037	887	5.25113	6.56664	6.91011	8.36021	6.09865	7.83702	112	123	130	168	119	151
NONRATT008747.2	NONRATT008747.2	PMID24510058	pokor.aSep08-unspliced	-	13:52201081-52201610	530	0.078458	0.0893432	0	0.249879	0	0	1	1	0	3	0	0
NONRATT023881.2	NONRATT023881.2	PMID24510058	worvar.aSep08	-	5:167317785-167322922	628	0.132429	0	0.0750435	0.0703186	0.072365	0.0733416	2	0	1	1	1	1
NONRATT000435.2	NONRATT000435.2	PMID24510058	sworflor.aSep08-unspliced	-	1:80300875-80301520	646	1.28752	2.19915	1.75167	2.04981	1.82956	1.85281	20	30	24	30	26	26
NONRATT025756.2	NONRATT025756.2	PMID24510058	smeeroy.aSep08	-	7:37932073-37934719	569	0	0	0.0828248	0.07761	0.0798686	0.161811	0	0	1	1	1	2
NONRATT028002.2	NONRATT028002.2	PMID24510058	seyrey.aSep08-unspliced	-	8:115068269-115068828	560	2.97048	1.09932	0.0841559	0.394127	0.974073	0.822057	40	13	1	5	12	10
NONRATT012918.2	NONRATT012918.2	PMID24510058	Prpf4b.cSep08-unspliced	-	17:30703454-30704072	619	0.940612	1.45353	1.59952	0.71305	0.807812	1.11559	14	19	21	10	11	15
NONRATT018253.2	NONRATT018253.2	PMID24510058	Integrin_alpha.1.bSep08	-	3:58506509-58512767	409	1.01679	0.926198	1.15272	1.6188	1.33369	0.900444	10	8	10	15	12	8
NONRATT019399.2	NONRATT019399.2	-	-	-	3:63497187-63502429	720	1.84835	1.90736	2.42288	2.82004	2.58856	2.04607	32	29	37	46	41	32
NONRATT030409.2	NONRATT030409.2	PMID24510058	Syn1.dSep08-unspliced	-	X:1375959-1376349	391	0	0.121105	0.12053	0.112941	0.116228	0.117797	0	1	1	1	1	1
NONRATT026310.2	NONRATT026310.2	PMID24510058	Scn8a.dSep08	-	7:142579307-142580534	525	0.554513	0.090194	0.0897663	0.336288	0.0865623	0.0877305	7	1	1	4	1	1
NONRATT007164.2	NONRATT007164.2	PMID24510058	vermaw.aSep08-unspliced	-	11:84919056-84920290	1235	0	0.0383416	0.0763581	0	0.0367977	0.186396	0	1	2	0	1	5
NONRATT009723.2	NONRATT009723.2	PMID24510058	chawjor.aSep08-unspliced	-	14:7222883-7226321	3439	2.46694	1.55599	0.575822	1.11666	0.68735	1.8741	204	113	42	87	52	140
NONRATT026120.2	NONRATT026120.2	PMID24510058	Syngr1.bSep08	-	7:121311024-121331395	574	1.01435	0	0	0.922819	0	0	14	0	0	12	0	0
NONRATT021129.2	NONRATT021129.2	PMID24510058	Pmpcb.cSep08-unspliced	-	4:9908819-9909235	417	0.698128	0.681322	1.13061	0.635076	0.872072	0.993622	7	6	10	6	8	9
NONRATT016964.2	NONRATT016964.2	PMID24510058	skufla.aSep08-unspliced	-	2:259866898-259867527	630	3.89471	4.58516	9.05545	6.58592	5.84464	8.98801	59	61	121	94	81	123
NONRATT005235.2	NONRATT005235.2	PMID24510058	Znf213.dSep08	-	10:12887368-12889637	607	2.67197	2.8085	3.49536	2.32694	2.24666	2.50278	39	36	45	32	30	33
NONRATT026273.2	NONRATT026273.2	PMID24510058	shasa.aSep08	-	7:139810072-139810569	227	16.6715	17.1061	21.3932	21.3893	16.0204	22.9167	91	82	103	110	80	113
NONRATT000894.2	NONRATT000894.2	PMID24510058	Dnase1l1.eSep08-unspliced	-	X:156434566-156435105	540	2.07936	2.10461	3.05587	2.20701	3.03053	1.6198	27	24	35	27	36	19
NONRATT026531.2	NONRATT026531.2	PMID24510058	Cfd.bSep08-unspliced	-	7:12634216-12634641	426	0.0976121	0.111155	0.110627	0.103662	0.106679	0.108119	1	1	1	1	1	1
NONRATT021998.2	NONRATT021998.2	PMID24510058	zf-C2H2.40.aSep08-unspliced	-	5:152037-153347	1311	1.26886	2.85357	2.55341	3.29956	3.57147	2.35273	40	79	71	98	103	67
NONRATT014366.2	NONRATT014366.2	PMID24510058	Acsf3.cSep08	-	19:55621294-55630249	344	0.24176	0.412952	0.274135	0.384987	0.396458	0.535293	2	3	2	3	3	4
NONRATT025368.2	NONRATT025368.2	PMID24510058	dyto.aSep08	-	6:135288640-135290798	688	0.725339	0.825973	1.30204	0.641538	1.25536	1.13753	12	12	19	10	19	17
NONRATT014465.2	NONRATT014465.2	PMID24510058	Herpud1.dSep08-unspliced	-	19:11053935-11054456	522	2.15106	2.81226	3.25162	3.97431	3.3963	5.20335	27	31	36	47	39	59
NONRATT006762.2	NONRATT006762.2	PMID24510058	Sdf2l1.bSep08-unspliced	-	11:88122319-88123020	702	0.355465	0.404717	0.3358	0.440152	0.582828	0.327919	6	6	5	7	9	5
ENSRNOT00000086565	NONRATT032095.1	ensembl	-	AABR07018373.1	15:54700487-54702211	354	0	0	0.133128	0	0.128376	0.130109	0	0	1	0	1	1
ENSRNOT00000086567	NONRATT032501.1	ensembl	-	AABR07044139.1	19:59408036-59408955	279	0.149042	0.16972	0.168915	0.15828	0.162886	0.165084	1	1	1	1	1	1
NONRATT002561.2	NONRATT002561.2	PMID24510058	slagla.aSep08-unspliced	-	1:93690525-93691985	1461	0.0284618	0	0.0645464	0	0.0311055	0	1	0	2	0	1	0
NONRATT018567.2	NONRATT018567.2	PMID24510058	chachy.aSep08	-	3:119506864-119514544	693	1.2602	2.39164	2.31319	2.293	2.36146	1.79361	21	35	34	36	36	27
NONRATT017134.2	NONRATT017134.2	PMID24510058	rawboy.aSep08-unspliced	-	20:5350912-5351605	694	0	0	0.0679068	0.0636312	0.065483	0	0	0	1	1	1	0
NONRATT023319.2	NONRATT023319.2	-	-	-	5:86387239-86407698	1217	0	0.466943	0.697348	0.290142	0	0.605229	0	12	18	8	0	16
NONRATT025766.2	NONRATT025766.2	PMID24510058	Atp2b1.kSep08-unspliced	-	7:41193857-41194595	739	0.675282	0.448529	0.701812	0.716777	1.23029	0.560677	12	7	11	12	20	9
ENSRNOT00000080248	NONRATT033629.1	ensembl	-	AABR07071512.1	8:119317102-119319954	944	0.0440495	0	0	0.0935123	0.0481411	0	1	0	0	2	1	0
NONRATT023642.2	NONRATT023642.2	-	-	-	5:147718624-147720036	746	0.891963	0.952178	1.13763	0.769187	1.15776	1.23419	16	15	18	13	19	20
NONRATT015868.2	NONRATT015868.2	PMID24510058	cheefla.aSep08-unspliced	-	2:252853961-252854750	790	0.684324	1.01902	1.25329	1.67618	0.863117	1.39854	13	17	21	30	15	24
NONRATT019781.2	NONRATT019781.2	PMID24510058	gyshu.aSep08-unspliced	-	3:145638613-145639270	658	1.89605	0.719704	1.3614	1.54291	2.14167	0.909546	30	10	19	23	31	13
NONRATT015417.2	NONRATT015417.2	PMID24510058	Cct3.dSep08-unspliced	-	2:187691761-187692472	712	0.759292	1.26367	0.463531	0.43397	1.27694	0.711251	13	19	7	7	20	11
NONRATT029958.2	NONRATT029958.2	PMID24510058	serpu.aSep08-unspliced	-	9:45468222-45469911	1690	0.0738155	0.196132	0.027886	0.156702	0.0268907	0.0272536	3	7	1	6	1	1
NONRATT028321.2	NONRATT028321.2	PMID24510058	sleepey.aSep08	-	8:22135679-22136123	351	0.94787	1.21428	0.940268	1.00599	1.4246	0.786927	8	9	7	8	11	6
NONRATT028216.2	NONRATT028216.2	PMID24510058	laroy.aSep08-unspliced	-	8:131966863-131968547	1685	0.172771	0.112408	0.0559658	0.130986	0.431637	0.218565	7	4	2	5	16	8
NONRATT000864.2	NONRATT000864.2	PMID24510058	teyflu.aSep08	-	1:143127019-143128652	217	1.91644	1.96412	1.95547	1.4239	3.35165	2.97001	10	9	9	7	16	14
NONRATT025637.2	NONRATT025637.2	PMID24510058	Kank3.cSep08	-	7:18677059-18677914	762	1.30985	2.29936	1.54686	2.02741	1.96864	2.17495	24	37	25	35	33	36
NONRATT002495.2	NONRATT002495.2	PMID24510058	RGD1303117.eSep08	-	1:88095242-88097085	630	0.39609	0.375809	0	0.350335	0	0.438431	6	5	0	5	0	6
NONRATT029353.2	NONRATT029353.2	PMID24510058	junoy.aSep08	-	9:50884901-50898550	814	6.64167	6.2829	10.3101	10.4656	7.70662	9.55782	130	108	178	193	138	169
NONRATT010730.2	NONRATT010730.2	PMID24510058	Chchd1.cSep08	-	15:4025457-4027013	1027	1.2148	1.24498	0.642715	1.46132	0.708187	0.448249	30	27	14	34	16	10
NONRATT016189.2	NONRATT016189.2	PMID24510058	darbla.aSep08-unspliced	-	2:60364584-60365207	624	10.93	11.3075	21.7608	15.1377	15.0799	12.5419	164	149	288	214	207	170
NONRATT019104.2	NONRATT019104.2	PMID24510058	snucha.aSep08	-	3:5556689-5557889	590	0.493423	0.561802	0.719214	0.598479	0.770492	0.780258	7	7	9	8	10	10
NONRATT018659.2	NONRATT018659.2	PMID24510058	bluchy.bSep08	-	3:134418131-134474499	274	1.66953	1.90116	1.03251	0.966521	1.99081	2.52026	11	11	6	6	12	15
NONRATT026686.2	NONRATT026686.2	PMID24510058	snoso.aSep08-unspliced	-	7:34482692-34483244	553	1.05287	0.77073	0.596807	1.11749	0.493243	0.66597	14	9	7	14	6	8
NONRATT022256.2	NONRATT022256.2	PMID24510058	meevey.aSep08-unspliced	-	5:63782998-63783521	524	0.0793564	0.994117	0.359932	0.33693	0.26027	0.702828	1	11	4	4	3	8
NONRATT012705.2	NONRATT012705.2	PMID24510058	sneyfer.aSep08-unspliced	-	17:1029242-1031079	1838	3.77859	5.33319	0.487378	0.432277	0.741961	0.450834	167	207	19	18	30	18
NONRATT017805.2	NONRATT017805.2	PMID24510058	mybor.aSep08-unspliced	-	20:44679955-44680826	872	2.38461	3.31267	1.56802	0.961744	0.990469	1.795	50	61	29	19	19	34
NONRATT011640.2	NONRATT011640.2	PMID24510058	gygoy.aSep08-unspliced	-	16:74752929-74753532	604	0.0688456	0.0783971	0.390285	0.0731127	0.301038	0.152434	1	1	5	1	4	2
NONRATT016943.2	NONRATT016943.2	PMID24510058	Prkacb.dSep08-unspliced	-	2:252621561-252622275	715	0.40716	0.794782	1.25287	1.23469	0.76291	0.321957	7	12	19	20	12	5
NONRATT017570.2	NONRATT017570.2	-	-	-	20:5071329-5072046	417	0	0.340661	0	0	0	0	0	3	0	0	0	0
NONRATT005122.2	NONRATT005122.2	PMID24510058	rymer.aSep08	-	10:108545289-108546778	330	0.504033	0.143491	0.428575	0.267502	0.137713	0.558003	4	1	3	2	1	4
NONRATT020094.2	NONRATT020094.2	PMID24510058	keywey.aSep08	-	4:698450-700903	2454	4.66034	6.27149	8.12704	8.50782	7.74307	7.97283	275	325	423	473	418	425
NONRATT013008.2	NONRATT013008.2	PMID24510058	glergy.aSep08-unspliced	-	17:57303793-57304858	1066	7.06124	5.0642	7.47476	6.21105	6.60975	5.83008	181	114	169	150	155	135
ENSRNOT00000086333	NONRATT032003.1	ensembl	-	AABR07014342.1	14:10296465-10297482	664	0.250499	0.0713131	0.284043	0.0665061	0.136953	0.0693652	4	1	4	1	2	1
NONRATT026626.2	NONRATT026626.2	PMID24510058	jarso.aSep08-unspliced	-	7:26433397-26434057	661	0.440423	0.716438	0.213963	0.467454	0.481405	0.487549	7	10	3	7	7	7
NONRATT018023.2	NONRATT018023.2	PMID24510058	Usp20.eSep08	-	3:9852865-9855246	1913	0.826088	1.1387	1.52806	0.992178	0.998041	1.44389	38	46	62	43	42	60
NONRATT001422.2	NONRATT001422.2	PMID24510058	Ctsf.bSep08	-	1:220118483-220119475	387	0.107449	0.122356	0.121776	0.684307	0.234978	0.119014	1	1	1	6	2	1
NONRATT025180.2	NONRATT025180.2	PMID24510058	gytoy.aSep08-unspliced	-	6:102333409-102335503	2095	1.56821	1.8309	2.81314	2.8654	1.95285	2.1315	79	81	125	136	90	97
NONRATT008267.2	NONRATT008267.2	PMID24510058	Kif14.dSep08-unspliced	-	13:53419892-53420649	758	0	0.0624695	0.373228	0.0582587	0.299831	0	0	1	6	1	5	0
NONRATT024432.2	NONRATT024432.2	PMID24510058	plertu.aSep08	-	6:102105337-102143600	726	4.41074	4.56586	6.23447	5.47187	6.32404	5.83379	77	70	96	90	101	92
NONRATT005678.2	NONRATT005678.2	PMID24510058	Pafah1b1.aSep08	-	10:61457217-61577440	4391	0.0662991	0.0754869	0.13959	0.100519	0.0931781	0.136297	7	7	13	10	9	13
NONRATT009229.2	NONRATT009229.2	PMID24510058	Hnrpdl.fSep08	-	14:11201140-11202056	812	2.56081	2.68267	4.06452	2.98977	2.12737	3.34501	50	46	70	55	38	59
NONRATT014551.2	NONRATT014551.2	PMID24510058	noydar.aSep08-unspliced	-	19:25124011-25124943	933	1.78293	1.1166	1.16228	1.23004	1.41295	1.28287	40	22	23	26	29	26
ENSRNOT00000081968	NONRATT032993.1	ensembl	-	AABR07053483.2	3:109811088-109814242	1098	0.0757427	0.0431256	0.0858855	0	0	0.0419477	2	1	2	0	0	1
NONRATT024976.2	NONRATT024976.2	-	-	-	6:55497284-55499344	2061	0.141252	0.528452	0.709177	0.92093	0.595531	0.536072	7	23	31	43	27	24
NONRATT005009.2	NONRATT005009.2	PMID24510058	Axin2.cSep08	-	10:97210061-97212651	270	0.462031	0.350755	0.174546	0.490502	0.168316	0.511589	3	2	1	3	1	3
NONRATT013195.2	NONRATT013195.2	PMID24510058	spodoy.aSep08-unspliced	-	18:410550-411728	1179	0.176382	0.0803255	0.439897	0.149747	0.269897	0.351434	5	2	11	4	7	9
NONRATT005114.2	NONRATT005114.2	PMID24510058	Pgs1.eSep08	-	10:107021830-107026195	440	0.472623	0.753325	0.964401	0.30099	0.413243	0.209251	5	7	9	3	4	2
NONRATT028713.2	NONRATT028713.2	PMID24510058	sporraw.aSep08-unspliced	-	8:79804015-79804731	717	0.812049	0.39625	0.657551	0.923416	0.824229	0.642053	14	6	10	15	13	10
NONRATT013032.2	NONRATT013032.2	PMID24510058	geefer.aSep08	-	17:45143772-45155999	656	0.126777	0.144365	0	0.134566	0.138623	0.0702112	2	2	0	2	2	1
NONRATT017891.2	NONRATT017891.2	PMID24510058	seychu.aSep08-unspliced	-	3:2781508-2782836	1329	2.06527	2.06663	2.62528	2.78988	2.56536	2.66725	66	58	74	84	75	77
NONRATT004187.2	NONRATT004187.2	PMID24510058	ADAM_CR.1.aSep08	-	10:31227008-31228699	308	0.270018	0.30748	0.306176	0.286609	0.147549	0.149541	2	2	2	2	1	1
ENSRNOT00000078305	NONRATT032828.1	ensembl	-	AC098763.1	20:12942218-12944749	285	0.291809	0	0.165359	0.309739	0	0.161609	2	0	1	2	0	1
NONRATT019975.2	NONRATT019975.2	-	-	-	3:162577920-162578875	956	4.82863	5.89456	6.46071	8.40317	7.22762	7.12694	111	119	131	182	152	148
NONRATT019629.2	NONRATT019629.2	PMID24510058	blochoy.aSep08-unspliced	-	3:113480777-113482774	1998	0.0208122	0	0	0.0221021	0.0227453	0	1	0	0	1	1	0
NONRATT006333.2	NONRATT006333.2	PMID24510058	wynor.aSep08-unspliced	-	10:108683755-108684174	420	0	0	0.112208	0.105143	0.108203	0	0	0	1	1	1	0
NONRATT013189.2	NONRATT013189.2	PMID24510058	speydoy.aSep08-unspliced	-	18:324980-325377	398	0	0.237949	0.355351	0.110955	0.342668	0.115725	0	2	3	1	3	1
NONRATT005885.2	NONRATT005885.2	PMID24510058	Crop.cSep08	-	10:81991152-81997265	995	2.84216	2.37963	3.26956	2.75043	2.92394	3.47006	68	50	69	62	64	75
NONRATT020189.2	NONRATT020189.2	-	-	-	4:22700906-22735234	312	1.59947	1.21415	3.02236	2.12208	2.33111	2.95098	12	8	20	15	16	20
NONRATT008285.2	NONRATT008285.2	PMID24510058	Glrx2.eSep08	-	13:60529820-60536590	331	0	1.28765	0	0	0	0	0	9	0	0	0	0
NONRATT011347.2	NONRATT011347.2	PMID24510058	Cherp.eSep08	-	16:19078883-19079804	694	0.179753	0.409382	1.01908	0.572424	0.720512	0.729698	3	6	15	9	11	11
NONRATT001846.2	NONRATT001846.2	PMID24510058	RGD1305481.cSep08	-	1:267505430-267508831	870	0.0477963	0	0.108393	2.94267	5.79982	0	1	0	2	58	111	0
NONRATT015042.2	NONRATT015042.2	PMID24510058	Mocs2.dSep08	-	2:46981035-46988455	612	0.679523	1.08329	0.847449	1.29824	1.70836	1.57968	10	14	11	18	23	21
NONRATT014948.2	NONRATT014948.2	PMID24510058	blushey.aSep08-unspliced	-	2:27884456-27885258	803	0.103569	0.117937	0.234875	0.164926	0.226435	0.401332	2	2	4	3	4	7
NONRATT012717.2	NONRATT012717.2	PMID24510058	RGD1563615.aSep08-unspliced	-	17:2201535-2201960	426	0.195224	0.222309	0	0.20722	0.213466	0	2	2	0	2	2	0
NONRATT029633.2	NONRATT029633.2	PMID24510058	vornoy.aSep08	-	9:94544717-94550444	2140	3.73118	3.65116	1.49817	3.98083	3.6324	3.97976	192	165	68	193	171	185
ENSRNOT00000081056	NONRATT032861.1	ensembl	-	AC115341.2	3:9109247-9115951	1027	0	0.138321	0	0.0429991	0.0442504	0.0448476	0	3	0	1	1	1
NONRATT017885.2	NONRATT017885.2	-	-	-	3:2666939-2668231	744	3.1861	3.43702	2.53488	2.66977	2.07735	2.35132	57	54	40	45	34	38
NONRATT013069.2	NONRATT013069.2	PMID24510058	jugu.aSep08-unspliced	-	17:65533995-65535082	1088	0.191134	0.261132	0.3467	0.486855	0.543173	0.296204	5	6	8	12	13	7
NONRATT004197.2	NONRATT004197.2	PMID24510058	Gnb2l1.dSep08	-	10:34151140-34152358	742	4.70797	3.89306	2.79583	2.79594	2.87941	2.66784	84	61	44	47	47	43
NONRATT030791.2	NONRATT030791.2	PMID24510058	Sh2d1a.bSep08	-	X:128899809-128918087	613	0	0.0772461	0.0768798	0.144006	0	0.0751362	0	1	1	2	0	1
NONRATT013892.2	NONRATT013892.2	PMID24510058	LOC690258.aSep08-unspliced	-	18:63221048-63221469	422	0.788394	1.12219	0.558606	0.94138	1.5081	1.4182	8	10	5	9	14	13
NONRATT029851.2	NONRATT029851.2	PMID24510058	LOC688615.aSep08-unspliced	-	9:23968832-23969173	342	0.972814	0.96919	1.51649	0.516232	0.797554	1.21152	8	7	11	4	6	9
NONRATT011426.2	NONRATT011426.2	-	-	-	16:21036648-21037295	648	0.256684	0.219222	0.509312	0.136228	0.420931	0.568336	4	3	7	2	6	8
NONRATT001430.2	NONRATT001430.2	PMID24510058	Eif1ad.cSep08-unspliced	-	1:220749977-220750341	365	0.341776	0.908118	0.904203	0.725553	0.871804	1.00899	3	7	7	6	7	8
NONRATT002840.2	NONRATT002840.2	PMID24510058	zeeglar.aSep08-unspliced	-	1:143700102-143702122	2021	4.36243	3.77243	0.256625	2.92664	3.95874	3.84961	212	161	11	134	176	169
NONRATT021744.2	NONRATT021744.2	PMID24510058	Klrk1.aSep08	-	4:163393219-163401090	1110	1.61104	0.725251	1.31677	0	1.18764	0	43	17	31	0	29	0
ENSRNOT00000077876	ENSRNOT00000077876	ensembl:lincRNA	-	AABR07043772.1	19:39502153-39537050	1350	2.52604	2.84129	2.20026	4.3486	3.704	3.13728	82	81	63	133	110	92
NONRATT005293.2	NONRATT005293.2	PMID24510058	RGD1561785andRhot2.fSep08-unspliced	-	10:15207001-15207781	781	0.69221	0.485038	1.08665	1.13035	0.814875	0.884189	13	8	18	20	14	15
NONRATT007655.2	NONRATT007655.2	PMID24510058	Ep400.cSep08	-	12:52017263-52023704	725	0.229422	0.522503	0.195075	0.304429	0.188113	0.317516	4	8	3	5	3	5
NONRATT009972.2	NONRATT009972.2	PMID24510058	Cpeb2.eSep08-unspliced	-	14:72333236-72333628	393	1.69314	1.80744	1.43961	0.898479	1.73502	1.63993	16	15	12	8	15	14
NONRATT015679.2	NONRATT015679.2	PMID24510058	Tmem77.fSep08	-	2:209163303-209181190	599	1.59687	2.05542	3.62072	2.50547	2.50435	2.22879	23	26	46	34	33	29
NONRATT001910.2	NONRATT001910.2	PMID24510058	Emx2.bSep08	-	1:280638772-280639750	412	0.302787	0.229863	0.228889	0.321446	0.331024	0.223472	3	2	2	3	3	2
NONRATT002197.2	NONRATT002197.2	PMID24510058	plerfly.cSep08	-	1:56808450-56890802	330	0.252017	0.143491	0	0	0.137713	0.279001	2	1	0	0	1	2
NONRATT027219.2	NONRATT027219.2	-	-	-	7:130080740-130082505	1685	0.345542	0.168612	0.223863	0.340542	0.107909	1.80319	14	6	8	13	4	66
NONRATT018326.2	NONRATT018326.2	PMID24510058	Slc43a1.dSep08-unspliced	-	3:72262554-72263293	740	0.168579	0.127978	0.254871	0.0596758	0.0614124	0.31108	3	2	4	1	1	5
NONRATT001302.2	NONRATT001302.2	PMID24510058	zorglor.aSep08-unspliced	-	1:207232281-207232935	655	1.84125	1.95205	3.959	2.35861	1.94326	2.67082	29	27	55	35	28	38
NONRATT024922.2	NONRATT024922.2	PMID24510058	votu.bSep08-unspliced	-	6:41040300-41040944	645	0.257878	10.9393	1.31577	7.04867	9.86686	9.4213	4	149	18	103	140	132
NONRATT016468.2	NONRATT016468.2	PMID24510058	kyblaw.aSep08-unspliced	-	2:166654039-166654791	753	0.276167	0.0628843	0.125235	0.175877	0.362236	0.30571	5	1	2	3	6	5
NONRATT004170.2	NONRATT004170.2	PMID24510058	Ebf1.cSep08	-	10:24040831-24049850	1077	0.115829	0.219832	0.0875602	1.06558	0.422089	0.128253	3	5	2	26	10	3
NONRATT007409.2	NONRATT007409.2	PMID24510058	Eif4h.dSep08-unspliced	-	12:25107986-25108838	853	1.51136	2.55372	2.0451	1.39717	0.532931	1.34924	31	46	37	27	10	25
NONRATT004189.2	NONRATT004189.2	PMID24510058	MED7.0.dSep08	-	10:31520997-31535038	699	0.475969	0.541938	0.539641	0.505154	0.325139	0.461044	8	8	8	8	5	7
NONRATT001609.2	NONRATT001609.2	PMID24510058	snorkly.aSep08-unspliced	-	1:240761512-240762558	1047	0.198619	0.0904525	0.22515	0.210803	0.0434052	0.0879374	5	2	5	5	1	2
NONRATT007588.2	NONRATT007588.2	PMID24510058	smoyley.aSep08-unspliced	-	12:45196584-45197001	418	0.0994803	0.113282	0.225604	0.211186	0.108721	0.110188	1	1	2	2	1	1
NONRATT027897.2	NONRATT027897.2	PMID24510058	Ick.dSep08	-	8:85414073-85436453	517	0.160862	1.09917	0.364806	0.170746	0.263794	0.44526	2	12	4	2	3	5
NONRATT029266.2	NONRATT029266.2	PMID24510058	ferpy.aSep08-unspliced	-	9:25436603-25437366	764	1.41528	1.17766	1.48113	1.67547	1.78498	1.86795	26	19	24	29	30	31
NONRATT004682.2	NONRATT004682.2	PMID24510058	RGD1559961.cSep08	-	10:72209899-72211438	421	1.08658	1.01238	1.11987	1.1533	1.18773	1.31217	11	9	10	11	11	12
NONRATT006620.2	NONRATT006620.2	PMID24510058	kleemo.aSep08-unspliced	-	11:68576271-68577274	1004	0.704171	0.801821	1.69058	1.75857	1.44887	1.00874	17	17	36	40	32	22
NONRATT023692.2	NONRATT023692.2	PMID24510058	mowar.aSep08-unspliced	-	5:151888560-151889076	517	2.01101	2.38142	3.00951	1.87829	2.46196	2.04803	25	26	33	22	28	23
NONRATT015479.2	NONRATT015479.2	PMID24510058	Rab13.cSep08	-	2:189585092-189586351	746	1.00345	1.1426	1.01122	2.0709	1.03592	0.925672	18	18	16	35	17	15
NONRATT023735.2	NONRATT023735.2	PMID24510058	swawwar.aSep08-unspliced	-	5:155018101-155018828	728	0.171358	0.0650438	0.712416	0.424432	0.686862	0.379411	3	1	11	7	11	6
NONRATT025168.2	NONRATT025168.2	PMID24510058	wortoy.aSep08-unspliced	-	6:105265786-105266107	322	2.84131	0.147056	1.02495	0	0.847091	0	22	1	7	0	6	0
ENSRNOT00000081965	NONRATT031805.1	ensembl	-	AABR07035722.1	12:21412538-21420169	2450	0.0848792	0.0193273	0.0384907	0.144123	0.0742151	0.0187994	5	1	2	8	4	1
ENSRNOT00000081963	ENSRNOT00000081963	ensembl:lincRNA	-	AABR07067728.1	9:59564498-59594416	1655	0	0	0.0284757	0.0533387	0.0824059	0.0278299	0	0	1	2	3	1
NONRATT007415.2	NONRATT007415.2	PMID24510058	Gtf2i.iSep08	-	12:25484515-25485680	590	1.69171	2.88943	3.35636	2.6933	1.77206	3.04304	24	36	42	36	23	39
NONRATT018762.2	NONRATT018762.2	PMID24510058	blushu.aSep08-unspliced	-	3:148918379-148919162	717	0.173986	0.528333	0.526094	0.430944	0.316976	0.834702	3	8	8	7	5	13
NONRATT030509.2	NONRATT030509.2	PMID24510058	LOC302680.cSep08-unspliced	-	X:33599663-33600083	421	0.493953	0.674849	0.223996	0.524255	0.216001	0.656084	5	6	2	5	2	6
NONRATT012662.2	NONRATT012662.2	PMID24510058	Mllt10.hSep08-unspliced	-	17:84971934-84972435	502	3.14802	3.39594	3.56902	2.54993	2.26385	2.47604	38	36	38	29	25	27
NONRATT015010.2	NONRATT015010.2	PMID24510058	spershaw.bSep08-unspliced	-	2:43292190-43293177	988	0.168351	0.191708	0.381791	0.31274	0.230033	0.465943	4	4	8	7	5	10
NONRATT027875.2	NONRATT027875.2	PMID24510058	Arpp19.aSep08	-	8:81949617-81971423	3230	0	0.01466	13.5752	13.0506	12.4271	14.7657	0	1	930	955	883	1036
NONRATT006875.2	NONRATT006875.2	PMID24510058	Donson.cSep08	-	11:31840317-31841403	748	0.444789	0.569804	0.630299	0.708153	0.364657	0.738533	8	9	10	12	6	12
NONRATT023828.2	NONRATT023828.2	PMID24510058	LOC500584.bSep08	-	5:164316658-164361107	2204	2.64165	2.42788	2.16062	3.26443	1.93877	1.92166	140	113	101	163	94	92
ENSRNOT00000083236	NONRATT032418.1	ensembl	-	AABR07031399.1	18:12224514-12284188	3072	5.69928	6.42801	6.76837	6.30775	6.6293	6.23404	421	417	441	439	448	416
NONRATT029392.2	NONRATT029392.2	PMID24510058	Mobkl3.cSep08	-	9:61739632-61742965	685	1.0321	0.967844	1.17014	1.15989	0.862733	0.672047	17	14	17	18	13	10
NONRATT016429.2	NONRATT016429.2	PMID24510058	Dhx36.bSep08	-	2:152785960-152788350	931	0.536019	0.661247	0	0	0	0	12	13	0	0	0	0
NONRATT027908.2	NONRATT027908.2	PMID24510058	tyree.aSep08-unspliced	-	8:87566505-87568417	1913	2.52176	3.21802	6.08763	5.56075	3.30302	3.51348	116	130	247	241	139	146
MSTRG.3789.1	-	-	-	-	10:65052774-65063728	10835	2.65605	2.95447	3.3724	3.60941	3.9018	3.15688	692	676	775	886	930	743
NONRATT018649.2	NONRATT018649.2	PMID24510058	Ankrd5.dSep08-unspliced	-	3:129504617-129505021	405	0.102673	0.116918	0.116364	0.109037	0	0.113725	1	1	1	1	0	1
NONRATT021689.2	NONRATT021689.2	PMID24510058	RGD1562010.aSep08	-	4:144302493-144306198	469	0	0.100963	0.100485	0.188221	0.0968981	0.392624	0	1	1	2	1	4
NONRATT003387.2	NONRATT003387.2	PMID24510058	Nadsyn1.bSep08	-	1:216998040-217000187	446	1.30547	1.59266	2.4314	0.989637	2.03852	1.54832	14	15	23	10	20	15
NONRATT025450.2	NONRATT025450.2	PMID24510058	Gls2.dSep08	-	7:2616789-2619195	289	0.57554	0.163847	0.326306	0.458255	0.786409	0.318583	4	1	2	3	5	2
NONRATT017336.2	NONRATT017336.2	PMID24510058	glerbor.aSep08	-	20:20529082-20530122	516	2.0149	1.19306	1.37063	2.99397	1.76198	2.5873	25	13	15	35	20	29
NONRATT001354.2	NONRATT001354.2	PMID24510058	Eps8l2.dSep08	-	1:214345251-214346859	765	3.26176	3.83791	5.0538	4.32744	4.57549	3.36996	60	62	82	75	77	56
NONRATT010117.2	NONRATT010117.2	PMID24510058	Mrps24.bSep08-unspliced	-	14:85951137-85951575	439	0.284165	0.647178	0.429623	0.703842	0.310664	0.419455	3	6	4	7	3	4
NONRATT003397.2	NONRATT003397.2	PMID24510058	spoflu.aSep08	-	1:218701720-218702111	286	2.1812	2.64922	3.95657	4.16709	3.17895	3.38029	15	16	24	27	20	21
NONRATT022058.2	NONRATT022058.2	PMID24510058	flarvaw.aSep08-unspliced	-	5:14615887-14616608	722	1.38242	1.90207	2.93862	2.68996	2.70734	2.93306	24	29	45	44	43	46
NONRATT018140.2	NONRATT018140.2	PMID24510058	RGD1560248.bSep08	-	3:38669630-38677637	2263	0.147018	0.18834	0.250007	0.253563	1.86814	0.447536	8	9	12	13	93	22
NONRATT020782.2	NONRATT020782.2	PMID24510058	sporzer.aSep08-unspliced	-	4:145234829-145235244	416	1.29956	1.59368	1.47342	1.80376	1.31125	1.65998	13	14	13	17	12	15
NONRATT016589.2	NONRATT016589.2	-	-	-	2:188402044-188403314	568	0.366116	0.083366	0.581046	0.233161	0.240109	0.324192	5	1	7	3	3	4
NONRATT006217.2	NONRATT006217.2	PMID24510058	roney.aSep08-unspliced	-	10:97871689-97872386	698	0.834153	0.814139	1.68869	1.5177	1.36766	1.78077	14	12	25	24	21	27
NONRATT001521.2	NONRATT001521.2	PMID24510058	keykla.aSep08-unspliced	-	1:225205203-225205691	489	0	83.282	61.3218	89.0921	0	91.3189	0	860	636	987	0	970
NONRATT027456.2	NONRATT027456.2	PMID24510058	leepoy.aSep08-unspliced	-	8:15791979-15792471	493	0	0	0.0955929	0.0895742	0	0.093425	0	0	1	1	0	1
NONRATT027702.2	NONRATT027702.2	PMID24510058	RGD1311251.bSep08	-	8:58004652-58012475	589	0	0.160787	0.320212	0.149874	0	0.0781978	0	2	4	2	0	1
NONRATT016927.2	NONRATT016927.2	PMID24510058	Clca4.bSep08	-	2:250855732-250857342	719	0.115668	0.065858	0.196703	0.122776	0.0632061	0.0640591	2	1	3	2	1	1
NONRATT015784.2	NONRATT015784.2	PMID24510058	plershee.aSep08	-	2:240424493-240425989	370	0.112386	0	0.127371	0.119352	0	0	1	0	1	1	0	0
NONRATT006761.2	NONRATT006761.2	PMID24510058	Ube2l3.bSep08	-	11:88047858-88086461	403	0	0	0	0.766717	0	0	0	0	0	7	0	0
NONRATT016595.2	NONRATT016595.2	PMID24510058	Dcst1andAdam15.cSep08	-	2:188661832-188664157	467	0.53434	0	0	0	0	0	6	0	0	0	0	0
NONRATT007713.2	NONRATT007713.2	PMID24510058	RGD1307396.cSep08	-	12:6711738-6715484	1343	2.16762	1.37514	0.596832	0.492993	0.541554	0.959781	70	39	17	15	16	28
NONRATT027954.2	NONRATT027954.2	PMID24510058	seyrer.aSep08-unspliced	-	8:103770834-103772070	1237	0.0336158	0.0382796	0.114333	0.0356993	0.110252	0.0744304	1	1	3	1	3	2
NONRATT021562.2	NONRATT021562.2	PMID24510058	LOC681041.aSep08-unspliced	-	4:117158715-117159690	976	2.00265	1.16444	0.917828	0.67837	0.279471	0.84901	47	24	19	15	6	18
NONRATT009327.2	NONRATT009327.2	PMID24510058	vawjey.bSep08	-	14:37713342-37714274	316	0.394773	0.749239	0.59685	0.558706	0.863175	0.437117	3	5	4	4	6	3
NONRATT012592.2	NONRATT012592.2	PMID24510058	Rbm17.dSep08	-	17:70588583-70591003	365	0.683662	0.389193	0.775087	0.362837	0.622663	0.252248	6	3	6	3	5	2
NONRATT010283.2	NONRATT010283.2	PMID24510058	Oxsm.bSep08-unspliced	-	15:10464593-10465434	842	0.345748	0.393662	0.391965	0.576648	0.161974	0.273396	7	7	7	11	3	5
NONRATT012233.2	NONRATT012233.2	PMID24510058	Gkap1.jSep08	-	17:6816228-6825140	1336	2.49026	2.41027	2.96441	1.55284	2.44983	2.99785	80	68	84	47	72	87
NONRATT003403.2	NONRATT003403.2	-	-	-	1:219134323-219139392	1345	0.618391	1.4083	1.29701	1.44398	0.912557	0.924144	20	40	37	44	27	27
NONRATT009337.2	NONRATT009337.2	PMID24510058	Commd8.bSep08	-	14:38612427-38620235	650	0.575823	1.01996	0.507745	0.271617	0.909188	0.991528	9	14	7	4	13	14
NONRATT021947.2	NONRATT021947.2	PMID24510058	Slc21a4.fSep08	-	4:176281850-176282130	281	4.14391	5.05569	8.22166	6.59743	6.14742	6.88087	28	30	49	42	38	42
NONRATT025315.2	NONRATT025315.2	PMID24510058	chovy.aSep08-unspliced	-	6:128466611-128467381	771	38.4587	40.2299	51.2456	65.2652	49.1136	54.276	713	655	838	1140	833	909
NONRATT002548.2	NONRATT002548.2	PMID24510058	fuflu.bSep08-unspliced	-	1:90149380-90150317	938	0.443356	1.11065	1.15608	1.27056	1.06617	1.12882	10	22	23	27	22	23
NONRATT018737.2	NONRATT018737.2	PMID24510058	rarshu.aSep08-unspliced	-	3:147785551-147786628	1078	2.70048	2.19641	2.62424	2.37488	2.86749	2.5623	70	50	60	58	68	60
NONRATT025634.2	NONRATT025634.2	PMID24510058	Pram1.cSep08	-	7:18515131-18515629	415	0.200399	0.114101	0.227234	0	0	0.110984	2	1	2	0	0	1
NONRATT026011.2	NONRATT026011.2	PMID24510058	Khdrbs3.cSep08	-	7:110120953-110179059	598	0	0.395919	0.315392	0.0738463	0.304058	0.307928	0	5	4	1	4	4
NONRATT003413.2	NONRATT003413.2	PMID24510058	Rps6kb2.cSep08	-	1:219406966-219407695	620	0.33541	0.229122	0.456301	0.7119	0.659912	0.668291	5	3	6	10	9	9
NONRATT013956.2	NONRATT013956.2	PMID24510058	fafee.aSep08-unspliced	-	18:77245141-77245545	405	2.05367	1.1693	1.28059	2.50676	1.5714	1.9324	20	10	11	23	14	17
NONRATT023996.2	NONRATT023996.2	PMID24510058	glerto.aSep08-unspliced	-	6:7036251-7036929	679	1.53121	0.976396	1.18048	1.30015	1.67372	0.881415	25	14	17	20	25	13
NONRATT012483.2	NONRATT012483.2	PMID24510058	Abt1.cSep08-unspliced	-	17:43946163-43946919	757	0.714156	0.56303	0.124574	0.349837	0.420355	0.42572	13	9	2	6	7	7
NONRATT015431.2	NONRATT015431.2	PMID24510058	rablee.aSep08-unspliced	-	2:188100008-188102377	2370	4.50966	5.07514	4.71484	5.56869	5.48566	4.56476	257	254	237	299	286	235
ENSRNOT00000086676	ENSRNOT00000086676	ensembl:lincRNA	-	AABR07057325.1	7:65729095-65731532	433	0.192068	0.109358	0.217788	0.305856	0.419924	0.212634	2	1	2	3	4	2
NONRATT022491.2	NONRATT022491.2	PMID24510058	dawu.aSep08-unspliced	-	5:130701352-130702140	789	0	0	0.119521	0	0.0575985	0	0	0	2	0	1	0
NONRATT015389.2	NONRATT015389.2	PMID24510058	fablee.aSep08-unspliced	-	2:186885179-186886287	1109	1.01249	0.853998	1.78562	1.39305	2.29546	1.49442	27	20	42	35	56	36
NONRATT029088.2	NONRATT029088.2	PMID24510058	sturor.aSep08-unspliced	-	8:129239665-129240425	761	0.874382	0.684517	0.86737	0.231999	0.716795	0.120986	16	11	14	4	12	2
NONRATT024899.2	NONRATT024899.2	PMID24510058	tatu.aSep08	-	6:29139438-29145898	248	0.335345	0	0	0.178065	1.09985	2.41323	2	0	0	1	6	13
NONRATT006297.2	NONRATT006297.2	PMID24510058	St6galnac2.bSep08-unspliced	-	10:105654384-105655723	1340	0.65173	0.388744	0.492588	0.691728	0.644544	1.37422	21	11	14	21	19	40
NONRATT002782.2	NONRATT002782.2	PMID24510058	reyflu.aSep08	-	1:139991855-139993953	606	0.343158	0.234415	0.311229	0.36421	0.225052	0.227936	5	3	4	5	3	3
NONRATT021886.2	NONRATT021886.2	PMID24510058	Csda.cSep08	-	4:165622562-165630040	538	0.231874	0.264044	0.175283	0.164081	0.0844706	0.342269	3	3	2	2	1	4
NONRATT000543.2	NONRATT000543.2	PMID24510058	Supt5h.dSep08	-	1:85437986-85453098	906	3.80986	3.13604	3.59074	2.28983	2.25787	2.03251	83	60	69	47	45	40
NONRATT027727.2	NONRATT027727.2	PMID24510058	kapor.bSep08	-	8:61823143-61831416	1026	1.98612	2.12313	2.89508	2.58129	2.17101	4.17285	49	46	63	60	49	93
NONRATT004148.2	NONRATT004148.2	PMID24510058	floymor.aSep08-unspliced	-	10:17520085-17521810	1726	1.87938	0.768219	1.66631	1.48327	1.65926	2.26713	78	28	61	58	63	85
NONRATT000442.2	NONRATT000442.2	PMID24510058	bofloy.aSep08-unspliced	-	1:80617754-80618565	812	0	0.174945	0.116136	0.326141	0	0.0567223	0	3	2	6	0	1
NONRATT003895.2	NONRATT003895.2	PMID24510058	chawklaw.aSep08-unspliced	-	1:267044313-267045504	1192	9.14081	10.1701	9.92806	10.4795	9.45771	14.7918	262	256	251	283	248	383
NONRATT014016.2	NONRATT014016.2	PMID24510058	neydar.aSep08	-	19:10118794-10119137	344	0.36264	0.137651	0.136998	0.51323	0.26435	0.401538	3	1	1	4	2	3
NONRATT013743.2	NONRATT013743.2	-	-	-	18:27730920-27736118	1962	3.43381	2.65494	3.31625	2.96965	2.873	2.44024	162	110	138	132	124	104
NONRATT022493.2	NONRATT022493.2	PMID24510058	RGD1564161.bSep08	-	5:130961830-131173368	480	0	0	0.0981819	0.0920002	0	0.0959552	0	0	1	1	0	1
NONRATT008260.2	NONRATT008260.2	PMID24510058	Tmem9.aSep08-unspliced	-	13:52869822-52870713	892	0.419602	0.42468	1.26859	0.791759	0.50963	0.412872	9	8	24	16	10	8
NONRATT004300.2	NONRATT004300.2	PMID24510058	Galnt10.cSep08	-	10:43067223-43142810	374	0.222368	0.253219	0.252145	0.236031	0.243146	0.492355	2	2	2	2	2	4
NONRATT022485.2	NONRATT022485.2	PMID24510058	Eps15.dSep08	-	5:129007329-129022272	738	2.14134	4.29914	1.66102	1.55505	1.90951	1.37232	38	67	26	26	31	22
NONRATT026345.2	NONRATT026345.2	-	-	-	7:144089905-144102181	1292	0.804713	0.659737	0.510889	0.375803	0.985166	0.534483	25	18	14	11	28	15
NONRATT000215.2	NONRATT000215.2	PMID24510058	kleyfly.bSep08	-	1:53925428-53931255	971	0.0856493	0	0.0485348	0.045479	0.0468025	0.0474341	2	0	1	1	1	1
NONRATT028342.2	NONRATT028342.2	PMID24510058	Rgl3.bSep08	-	8:22980389-22985492	1104	0.52739	0.0857824	0.341675	0.19992	0.0411641	0.500383	14	2	8	5	1	12
NONRATT017582.2	NONRATT017582.2	-	-	-	20:5432559-5433591	775	8.31743	8.85986	13.1407	9.91011	9.56083	5.88072	155	145	216	174	163	99
NONRATT014133.2	NONRATT014133.2	PMID24510058	Cacna1a.kSep08-unspliced	-	19:25724801-25725423	623	0	0.228019	0.378382	0.425083	0.218911	0.665073	0	3	5	6	3	9
NONRATT012296.2	NONRATT012296.2	PMID24510058	Rnf44.cSep08-unspliced	-	17:10468817-10469238	422	0.689857	0.785458	0.558606	0.627552	0.969538	1.52723	7	7	5	6	9	14
NONRATT028343.2	NONRATT028343.2	PMID24510058	rarra.aSep08-unspliced	-	8:22981423-22982177	755	1.37707	0.752674	1.24897	0.818508	1.38479	1.03659	25	12	20	14	23	17
NONRATT006334.2	NONRATT006334.2	PMID24510058	wunor.aSep08-unspliced	-	10:108684211-108684875	665	0	0.213617	0.0708681	0.0664061	0.0683387	0.138452	0	3	1	1	1	2
NONRATT000682.2	NONRATT000682.2	PMID24510058	Stk22s1.dSep08	-	1:100952456-100953937	434	0	0	0	0.2034	0.209531	0	0	0	0	2	2	0
NONRATT020063.2	NONRATT020063.2	PMID24510058	bychu.aSep08	-	3:176990797-177012932	777	0.588739	0.914189	0.788856	0.340832	1.05308	0.414762	11	15	13	6	18	7
NONRATT007626.2	NONRATT007626.2	PMID24510058	Ssh1.cSep08-unspliced	-	12:48445250-48445641	392	0.530495	0.483182	1.56363	0.450386	0.695825	0.704621	5	4	13	4	6	6
NONRATT025348.2	NONRATT025348.2	PMID24510058	koyvu.aSep08-unspliced	-	6:134948568-134948928	361	0.230375	0.91818	0.652997	0.366858	1.00735	0.382629	2	7	5	3	8	3
NONRATT014782.2	NONRATT014782.2	PMID24510058	RGD1309651.bSep08-unspliced	-	19:54186993-54187408	416	0.0999586	0.227653	0.113287	0.106154	0.109243	0.110718	1	2	1	1	1	1
NONRATT019268.2	NONRATT019268.2	PMID24510058	flachar.aSep08-unspliced	-	3:29437703-29438387	685	0.182114	0.20738	0.137668	0.193337	0.331784	0.268819	3	3	2	3	5	4
NONRATT019482.2	NONRATT019482.2	PMID24510058	reychey.aSep08-unspliced	-	3:81881944-81882798	855	0.778251	0.60926	0.71689	0.826023	0.744348	0.430739	16	11	13	16	14	8
NONRATT011090.2	NONRATT011090.2	PMID24510058	Cog3.dSep08	-	15:57770001-57773844	344	0.967158	0.688254	0.548269	0.898218	1.05713	0.669184	8	5	4	7	8	5
NONRATT027300.2	NONRATT027300.2	PMID24510058	Senp1.aSep08	-	7:139668405-139675242	338	0.369078	0.560377	1.67386	1.82832	0.941446	2.31545	3	4	12	14	7	17
NONRATT000155.2	NONRATT000155.2	PMID24510058	Rbm16.bSep08	-	1:44118530-44170994	2546	1.69876	1.58097	1.20371	1.90706	2.05329	2.06131	104	85	65	110	115	114
NONRATT000209.2	NONRATT000209.2	PMID24510058	glorfly.aSep08	-	1:53285705-53423534	610	0.136337	0.077626	0.154594	0.0723936	0.149076	0.226441	2	1	2	1	2	3
NONRATT014123.2	NONRATT014123.2	PMID24510058	RGD1306072.cSep08	-	19:25262086-25276278	720	0.924173	0.0657665	0.19643	0.122605	0.126301	0.639378	16	1	3	2	2	10
NONRATT001047.2	NONRATT001047.2	PMID24510058	RGD1311634.aSep08	-	1:166982190-166985363	1001	4.90239	22.5182	5.55794	4.93872	4.22338	9.88785	118	476	118	112	93	215
NONRATT006987.2	NONRATT006987.2	PMID24510058	kloymu.aSep08-unspliced	-	11:60523687-60524545	859	0.0484083	0.220498	0.164644	0.25694	0.158768	0.160802	1	4	3	5	3	3
NONRATT003704.2	NONRATT003704.2	PMID24510058	RGD1311595.aSep08-unspliced	-	1:247944264-247944799	536	0.310319	0.706744	0.96761	0.741161	0.678459	0.51532	4	8	11	9	8	6
NONRATT019573.2	NONRATT019573.2	PMID24510058	Zfp770.aSep08	-	3:105661999-105667165	1669	4.75923	4.36945	5.22616	4.91913	4.49406	4.49602	191	154	185	186	165	163
NONRATT022684.2	NONRATT022684.2	PMID24510058	LOC688729.aSep08-unspliced	-	5:150032511-150032974	464	0.089618	0.102051	0	0.0951726	0.0979423	0.0992641	1	1	0	1	1	1
NONRATT015309.2	NONRATT015309.2	PMID24510058	Tsc22d2.aSep08	-	2:148630200-148653146	759	1.4246	0.935869	1.80146	1.16311	1.4973	1.39504	26	15	29	20	25	23
NONRATT021923.2	NONRATT021923.2	PMID24510058	Mgp.cSep08	-	4:170856773-170860212	2050	5.11219	4.15795	6.89977	3.33741	5.72106	3.70533	252	180	300	155	258	165
NONRATT002396.2	NONRATT002396.2	PMID24510058	nyfloy.aSep08-unspliced	-	1:81964333-81964910	578	0.0719425	0.0819237	0.0815351	0.0764015	0.0786249	0.079686	1	1	1	1	1	1
NONRATT005290.2	NONRATT005290.2	PMID24510058	moymor.aSep08-unspliced	-	10:15201503-15202148	646	0.193109	0.2932	0.583915	0.205009	0.633352	0.855143	3	4	8	3	9	12
NONRATT026500.2	NONRATT026500.2	PMID24510058	stusy.aSep08-unspliced	-	7:12252754-12253490	737	0.169265	0.192748	0.447808	0.419249	0.18505	0.312346	3	3	7	7	3	5
NONRATT026481.2	NONRATT026481.2	PMID24510058	smarsy.aSep08-unspliced	-	7:11787076-11787717	642	3.04453	3.83557	5.36109	2.68137	3.68193	4.87608	47	52	73	39	52	68
NONRATT004515.2	NONRATT004515.2	PMID24510058	Wscd1.bSep08	-	10:58330706-58342691	370	0.224772	0	0.254871	0	0	0	2	0	2	0	0	0
NONRATT007616.2	NONRATT007616.2	PMID24510058	RGD1560398.aSep08-unspliced	-	12:47554891-47555769	879	0.898922	1.02359	1.66281	1.60689	0.87918	1.15219	19	19	31	32	17	22
NONRATT029817.2	NONRATT029817.2	PMID24510058	blopa.aSep08-unspliced	-	9:17121497-17122159	663	0.250876	0.142841	0.142236	0.199752	0.479953	0.833216	4	2	2	3	7	12
ENSRNOT00000081475	NONRATT033151.1	ensembl	-	AABR07062350.1	4:170472937-170476931	941	0.04419	0	0.100215	0	0	0.0978432	1	0	2	0	0	2
NONRATT005639.2	NONRATT005639.2	PMID24510058	Derl2.dSep08-unspliced	-	10:57644194-57644893	700	25.7247	1.96185	3.70449	2.08088	4.80559	1.77568	433	29	55	33	74	27
NONRATT019089.2	NONRATT019089.2	PMID24510058	smercha.bSep08	-	3:3855220-3855966	570	0.583688	0.581514	0.827129	0.464608	0.558261	0.726913	8	7	10	6	7	9
NONRATT024514.2	NONRATT024514.2	PMID24510058	jarva.aSep08-unspliced	-	6:109464914-109465518	605	0.481189	0.234803	0.233768	0.218902	0.30054	0.0761298	7	3	3	3	4	1
NONRATT014510.2	NONRATT014510.2	PMID24510058	spordaw.aSep08-unspliced	-	19:19703102-19705805	2704	0.415257	0.665482	0.557966	0.767229	1.05913	0.493729	27	38	32	47	63	29
NONRATT006112.2	NONRATT006112.2	PMID24510058	Kif18b.cSep08	-	10:91008307-91019306	1137	0	0	0.165879	0	0	0	0	0	4	0	0	0
NONRATT014890.2	NONRATT014890.2	PMID24510058	Tmem161b.cSep08	-	2:12251343-12537134	754	0.0551495	0.0628009	0.125069	0.117076	0.0602722	0.122109	1	1	2	2	1	2
NONRATT018189.2	NONRATT018189.2	-	-	-	3:48626037-48655066	458	0.908008	1.03399	0.617701	0.867385	0.694779	0.402054	10	10	6	9	7	4
ENSRNOT00000078149	NONRATT033160.1	ensembl	-	AABR07046738.1	5:4275832-4297280	322	0.258278	0.147056	0.439222	0.137143	0.141134	0.143039	2	1	3	1	1	1
ENSRNOT00000091067	NONRATT031809.1	ensembl	-	AABR07035780.5	12:22340574-22351622	2569	0.323759	0.405523	0.422112	0.257723	0.548547	0.179195	20	22	23	15	31	10
NONRATT020926.2	NONRATT020926.2	PMID24510058	LOC689619.bSep08	-	4:161720635-161728467	429	0.290789	0	0.109854	0	0.105933	0	3	0	1	0	1	0
NONRATT031217.2	NONRATT031217.2	PMID24510058	marty.aSep08-unspliced	-	7:140767094-140767628	535	1.55465	1.15069	1.41004	1.73255	0.849702	1.03257	20	13	16	21	10	12
NONRATT009481.2	NONRATT009481.2	PMID24510058	Mxd4.cSep08-unspliced	-	14:81825650-81827582	1933	2.21597	3.23374	4.60994	3.72209	5.52645	4.54883	103	132	189	163	235	191
NONRATT018794.2	NONRATT018794.2	PMID24510058	klochy.aSep08	-	3:150636231-150660234	504	0.90764	1.59728	0.748431	1.57644	1.17256	2.46622	11	17	8	18	13	27
NONRATT024752.2	NONRATT024752.2	PMID24510058	Heatr5b.eSep08-unspliced	-	6:1343961-1344685	725	0.114711	0.130626	0.195075	0.304429	0.188113	0.126994	2	2	3	5	3	2
NONRATT011884.2	NONRATT011884.2	PMID24510058	Sfrs14.dSep08	-	16:20911708-20914664	1058	1.29716	1.25326	1.55971	2.00256	1.54678	1.39241	33	28	35	48	36	32
NONRATT020867.2	NONRATT020867.2	PMID24510058	spyzey.aSep08-unspliced	-	4:153439423-153441898	2476	7.60864	7.28679	9.94001	10.2149	8.99615	9.42659	453	381	522	573	490	507
NONRATT006469.2	NONRATT006469.2	-	-	-	11:32454725-32460239	521	0.0798134	0.27266	0.271458	0.169435	0.174542	0.265123	1	3	3	2	2	3
NONRATT018805.2	NONRATT018805.2	PMID24510058	Cep250.bSep08	-	3:151540345-151541512	703	0.236602	0.404141	0.603608	0.12557	0.194	0.327453	4	6	9	2	3	5
NONRATT009032.2	NONRATT009032.2	PMID24510058	sperly.aSep08-unspliced	-	13:96771207-96772024	818	1.57602	2.77877	0.922214	0.863385	1.94504	1.57578	31	48	16	16	35	28
NONRATT017525.2	NONRATT017525.2	PMID24510058	Flot1.eSep08	-	20:3429882-3430444	415	1.00209	0.342303	0.454469	0.319122	0.547644	0.665569	10	3	4	3	5	6
NONRATT024377.2	NONRATT024377.2	PMID24510058	wawtor.aSep08-unspliced	-	6:94489683-94490411	729	3.53692	3.63765	4.98001	4.66223	4.61442	5.30453	62	56	77	77	74	84
NONRATT005799.2	NONRATT005799.2	PMID24510058	Ggnbp2.dSep08-unspliced	-	10:72187787-72188153	367	1.47307	1.67744	1.5416	3.60812	1.98176	2.00698	13	13	12	30	16	16
NONRATT015013.2	NONRATT015013.2	-	-	-	2:43796388-43796994	607	0.274021	0.234029	0	0	0.0748685	0.0758789	4	3	0	0	1	1
NONRATT013113.2	NONRATT013113.2	PMID24510058	nawfer.aSep08-unspliced	-	17:77212913-77213746	834	0.0498594	0.113554	0.0565076	0.0529497	0.0544907	0.110396	1	2	1	1	1	2
NONRATT020449.2	NONRATT020449.2	-	-	-	4:78290478-78293737	705	0.943836	0	1.20379	0.500854	1.09617	1.69775	16	0	18	8	17	26
NONRATT017450.2	NONRATT017450.2	-	-	-	20:47543782-47560344	1406	0.354931	0.639923	1.07307	0.219763	0.775966	0.130968	12	19	32	7	24	4
NONRATT028812.2	NONRATT028812.2	PMID24510058	rawree.aSep08-unspliced	-	8:87261374-87261859	486	0.51345	0.194864	0.291007	0.181637	0.0935087	0.189445	6	2	3	2	1	2
ENSRNOT00000085492	ENSRNOT00000085492	ensembl:lincRNA	-	AABR07066020.1	9:604106-605637	989	2.06042	1.14913	1.57322	1.8745	1.42489	0.930945	49	24	33	42	31	20
NONRATT002815.2	NONRATT002815.2	PMID24510058	Fes.eSep08	-	1:142178573-142180043	469	0.35465	1.31262	0.603213	0.658821	0.872378	0.294518	4	13	6	7	9	3
NONRATT013349.2	NONRATT013349.2	PMID24510058	PurA.1.aSep08-unspliced	-	18:29110212-29110741	530	0.941572	1.16155	0.622706	1.16599	1.54386	13.8977	12	13	7	14	18	160
NONRATT021711.2	NONRATT021711.2	PMID24510058	ferzey.aSep08-unspliced	-	4:145759381-145759832	452	0.275992	0.838086	0.417267	0.3906	0.201187	0.305595	3	8	4	4	2	3
NONRATT030876.2	NONRATT030876.2	PMID24510058	RCC1.0.aSep08	-	X:14320061-14331486	890	0.186889	0.957731	0.635692	0.49593	0.357538	0.362101	4	18	12	10	7	7
ENSRNOT00000090002	NONRATT033572.1	ensembl	-	AABR07058578.2	7:125617538-125618728	1030	0.0807432	0.229863	0.274667	0.342818	0.220653	0.178778	2	5	6	8	5	4
NONRATT018789.2	NONRATT018789.2	PMID24510058	Raly.eSep08	-	3:150323110-150380664	652	1.53084	1.08946	0.723104	0.947812	0.418349	1.27091	24	15	10	14	6	18
NONRATT023206.2	NONRATT023206.2	PMID24510058	woyvey.aSep08-unspliced	-	5:60004902-60005878	977	0.0425617	0.0969332	0.0482367	0.180707	0.0465151	0.235619	1	2	1	4	1	5
NONRATT000539.2	NONRATT000539.2	PMID24510058	Supt5h.hSep08	-	1:85437780-85438753	475	0.963054	0.897292	1.38962	0.743373	0.765587	1.16299	11	9	14	8	8	12
NONRATT004905.2	NONRATT004905.2	PMID24510058	Vps25.cSep08	-	10:89174699-89176961	404	1.44119	1.64102	1.05034	1.42033	0.787645	1.70929	14	14	9	13	7	15
NONRATT022007.2	NONRATT022007.2	PMID24510058	keyvar.aSep08	-	5:2058548-2059552	1005	0.0413759	0.0471163	0.140726	0.0439404	0.0904841	0.229054	1	1	3	1	2	5
NONRATT015606.2	NONRATT015606.2	PMID24510058	cheyshee.bSep08	-	2:199882466-199918298	699	0.0594889	0.0677423	0	0.0631761	0	0	1	1	0	1	0	0
NONRATT001826.2	NONRATT001826.2	PMID24510058	As3mt.fSep08-unspliced	-	1:266493456-266494448	993	1.17265	1.09682	1.32944	1.15572	1.00712	1.62261	28	23	28	26	22	35
NONRATT022950.2	NONRATT022950.2	PMID24510058	Ube2j2.eSep08	-	5:173372690-173385765	787	1.10968	1.80515	1.8572	2.5239	1.15525	2.16433	21	30	31	45	20	37
NONRATT013355.2	NONRATT013355.2	PMID24510058	sheedoy.aSep08	-	18:29171009-29222047	525	0	0	0	0.252258	0	0	0	0	0	3	0	0
NONRATT002801.2	NONRATT002801.2	PMID24510058	RGD1311021.bSep08	-	1:141612955-141641757	1017	0.490692	0.465649	0.649035	0.998266	0.402306	0.588477	12	10	14	23	9	13
NONRATT030626.2	NONRATT030626.2	PMID24510058	slubee.aSep08-unspliced	-	X:82146533-82147178	646	0.128739	0.586401	0.0729525	0.614957	0.211117	0.783917	2	8	1	9	3	11
NONRATT021768.2	NONRATT021768.2	PMID24510058	KRAB.42.cSep08-unspliced	-	4:150484862-150485250	389	0.106897	0.243454	0.242422	0.22693	0.116826	0.118402	1	2	2	2	1	1
NONRATT009854.2	NONRATT009854.2	PMID24510058	Dcun1d4.bSep08	-	14:37253871-37262829	543	0.536132	0.348817	1.30247	1.21932	1.25573	1.10218	7	4	15	15	15	13
NONRATT004911.2	NONRATT004911.2	PMID24510058	sneenee.aSep08-unspliced	-	10:89291771-89292571	801	11.0588	19.0956	10.654	5.62082	13.1096	10.8049	213	323	181	102	231	188
NONRATT033105.1	NONRATT033105.1	ensembl	-	-	4:10747989-10749291	1303	1.915	1.70812	1.95397	2.50678	1.81412	2.19051	60	47	54	74	52	62
NONRATT003173.2	NONRATT003173.2	PMID24510058	Giyd2.fSep08	-	1:198119516-198120027	393	1.164	3.37391	1.67956	1.68471	2.42907	1.63993	11	28	14	15	21	14
NONRATT012889.2	NONRATT012889.2	PMID24510058	nerfoy.aSep08-unspliced	-	17:24162109-24163031	923	34.4682	36.5805	40.1502	48.3004	32.4067	38.0059	765	713	786	1010	658	762
NONRATT009937.2	NONRATT009937.2	-	-	-	14:60493768-60503700	890	0.84109	0.532096	0.58274	1.0911	0.8172	0.620699	18	10	11	22	16	12
NONRATT015787.2	NONRATT015787.2	PMID24510058	plorshee.aSep08	-	2:240527126-240532911	552	0.0753311	0	0	0.0800001	0.329397	0.166794	1	0	0	1	4	2
NONRATT019599.2	NONRATT019599.2	PMID24510058	Inoc1.bSep08-unspliced	-	3:111187568-111187955	388	4.07295	3.17318	6.31886	5.9156	3.04613	1.66106	38	26	52	52	26	14
NONRATT015452.2	NONRATT015452.2	PMID24510058	Shc1.cSep08	-	2:188753270-188757084	2558	4.24326	2.94346	3.04124	2.26049	4.42496	4.76917	261	159	165	131	249	265
NONRATT023643.2	NONRATT023643.2	PMID24510058	mervar.aSep08	-	5:147859730-147861916	278	0.149578	0.340661	0.169523	0.158849	0.163472	0.165678	1	2	1	1	1	1
NONRATT010467.2	NONRATT010467.2	PMID24510058	zyja.aSep08	-	15:37156273-37171740	846	12.1419	12.2025	15.2146	14.1394	14.0243	0	247	218	273	271	261	0
NONRATT029640.2	NONRATT029640.2	-	-	-	9:95043886-95045224	292	0.284813	0.324328	0.484348	0.453547	0.311426	0.31531	2	2	3	3	2	2
NONRATT012234.2	NONRATT012234.2	PMID24510058	Ubqln1.cSep08	-	17:6875403-6878849	2190	1.6521	4.51922	1.87301	2.82174	3.07205	2.7958	87	209	87	140	148	133
NONRATT023742.2	NONRATT023742.2	PMID24510058	savar.aSep08	-	5:155399365-155402556	734	1.24646	1.35482	2.05551	1.38316	1.11477	1.81886	22	21	32	23	18	29
NONRATT004420.2	NONRATT004420.2	PMID24510058	Stx8.dSep08	-	10:54516193-54564596	358	0.464612	0.529071	0.13164	0.123352	0	1.02872	4	4	1	1	0	8
NONRATT025280.2	NONRATT025280.2	PMID24510058	Ccdc88c.aSep08	-	6:124965371-125027512	561	0.222368	0.253219	0.252103	0.472062	0.243105	0.328237	3	3	3	6	3	4
NONRATT024649.2	NONRATT024649.2	PMID24510058	n14	-	6:133783445-133792370	1769	0	0	0.0266406	0	0.0256898	0.0520466	0	0	1	0	1	2
NONRATT012397.2	NONRATT012397.2	PMID24510058	Thioredoxin.0.bSep08	-	17:26952062-26953901	618	0.471067	0.612969	0.534036	0.642819	0.294218	0.22351	7	8	7	9	4	3
NONRATT010697.2	NONRATT010697.2	PMID24510058	klajer.aSep08-unspliced	-	15:107789379-107790070	692	0.240363	0.205283	0.408825	0.701645	2.89038	0.332658	4	3	6	11	44	5
ENSRNOT00000087533	ENSRNOT00000087533	ensembl:lincRNA	-	AABR07064918.1	6:100671127-100673947	154	0.270018	0.30748	0	0	0	0.299081	1	1	0	0	0	1
NONRATT014946.2	NONRATT014946.2	PMID24510058	cheyblar.aSep08-unspliced	-	2:27236103-27236615	513	0.891716	0.461519	0.735301	0.602314	0.443026	0.987155	11	5	8	7	5	11
NONRATT020304.2	NONRATT020304.2	PMID24510058	swaza.aSep08-unspliced	-	4:56702173-56703990	1818	0.0457456	0.0520923	0.129666	0	0.0249974	0.126622	2	2	5	0	1	5
NONRATT005311.2	NONRATT005311.2	PMID24510058	rumor.aSep08-unspliced	-	10:15432624-15433021	398	3.44822	3.33152	5.92315	6.65427	2.17007	6.59316	33	28	50	60	19	57
NONRATT012138.2	NONRATT012138.2	PMID24510058	Lamp1.dSep08	-	16:81690108-81691161	969	5.57928	4.88696	6.08208	4.69184	3.98756	5.22597	130	100	125	103	85	110
NONRATT013347.2	NONRATT013347.2	PMID24510058	Cxxc5.cSep08-unspliced	-	18:28654695-28656146	1452	6.53022	6.42482	10.5532	8.29902	9.61132	9.25793	228	197	325	273	307	292
NONRATT024007.2	NONRATT024007.2	PMID24510058	Slc3a1.bSep08	-	6:8300503-8304139	285	42.1709	54.9977	91.9807	76.9738	51.5191	61.0584	289	331	556	497	323	378
NONRATT018662.2	NONRATT018662.2	PMID24510058	blawchy.aSep08	-	3:136396438-136419212	402	0.413759	0.117791	0.351815	0.219591	0.113048	0.343604	4	1	3	2	1	3
NONRATT020332.2	NONRATT020332.2	PMID24510058	reezy.aSep08-unspliced	-	4:58734812-58735132	321	1.03646	0.885082	1.90947	0.962576	0.84973	1.14729	8	6	13	7	6	8
NONRATT004456.2	NONRATT004456.2	PMID24510058	RGD1563438.cSep08	-	10:56424724-56447131	444	0	0	7.32706	2.48539	0	0.311101	0	0	69	25	0	3
NONRATT019711.2	NONRATT019711.2	PMID24510058	sherchy.aSep08	-	3:124515582-124516141	403	0.103183	0.117498	0	0.109578	0	0.114289	1	1	0	1	0	1
NONRATT015543.2	NONRATT015543.2	PMID24510058	Pi4kb.dSep08-unspliced	-	2:196170396-196171737	1342	2.16924	2.47006	2.49442	3.19044	2.37115	2.98445	70	70	71	97	70	87
ENSRNOT00000080169	NONRATT032100.1	ensembl	-	AABR07018504.1	15:62346254-62382236	863	0.240966	0.109738	0.382427	0.511446	0.263351	0.586803	5	2	7	10	5	11
MSTRG.9845.1	-	-	-	-	17:87419157-87422650	2755	1.43403	2.20013	4.50091	3.57285	2.72253	2.37283	95	128	263	223	165	142
NONRATT005305.2	NONRATT005305.2	-	-	-	10:15321695-15322317	537	0.154871	0.0881785	0.0877603	0.411008	0.169342	0.428677	2	1	1	5	2	5
NONRATT022106.2	NONRATT022106.2	PMID24510058	RGD1564940.aSep08-unspliced	-	5:25254687-25267872	1543	0.485139	0.644482	0.580558	0.486303	0.559747	0.477358	18	21	19	17	19	16
NONRATT022196.2	NONRATT022196.2	PMID24510058	jorvey.aSep08-unspliced	-	5:57532089-57533090	1002	3.1543	3.44997	3.48203	3.17171	3.58402	4.04311	76	73	74	72	79	88
NONRATT021090.2	NONRATT021090.2	PMID24510058	Galnt11.eSep08	-	4:6309219-6312907	971	3.85463	3.70642	10.1969	9.0007	6.74146	7.15905	90	76	210	198	144	151
NONRATT027309.2	NONRATT027309.2	PMID24510058	Hdac7a.cSep08	-	7:139293200-139294755	425	0.195684	0.222832	0.665663	1.03854	1.17655	0.758282	2	2	6	10	11	7
NONRATT015126.2	NONRATT015126.2	PMID24510058	Dap.cSep08-unspliced	-	2:84327505-84328998	1494	0.862909	1.33124	1.35701	2.21586	4.9596	1.5407	31	42	43	75	163	50
NONRATT020479.2	NONRATT020479.2	PMID24510058	stywer.aSep08	-	4:84483433-84483902	352	2.36289	2.42154	2.81279	3.51109	2.5829	2.35407	20	18	21	28	20	18
NONRATT017272.2	NONRATT017272.2	PMID24510058	plada.aSep08-unspliced	-	20:11490729-11491352	624	1.59953	2.73199	1.1334	1.20251	1.0199	1.5493	24	36	15	17	14	21
NONRATT014403.2	NONRATT014403.2	PMID24510058	Cog2.bSep08	-	19:57318798-57325119	1561	0.372991	0.515713	0.362438	0.480695	0.815397	0.619323	14	17	12	17	28	21
NONRATT014415.2	NONRATT014415.2	PMID24510058	feedoy.aSep08-unspliced	-	19:58778668-58779408	741	13.9746	12.3339	12.0893	9.70957	10.6743	13.4194	249	193	190	163	174	216
NONRATT001670.2	NONRATT001670.2	PMID24510058	smeyklu.aSep08-unspliced	-	1:248403664-248404151	488	6.81759	3.78446	3.86465	4.07031	4.00553	2.07536	80	39	40	45	43	22
NONRATT023586.2	NONRATT023586.2	PMID24510058	Ndufs5.cSep08-unspliced	-	5:141393821-141394235	415	2.40508	1.93983	2.045	1.80811	1.86217	1.77485	24	17	18	17	17	16
NONRATT012887.2	NONRATT012887.2	PMID24510058	RGD1561940.dSep08	-	17:24021774-24033220	753	1.93301	2.5155	2.3167	1.87577	1.93182	2.69003	35	40	37	32	32	44
NONRATT011228.2	NONRATT011228.2	PMID24510058	loygar.aSep08	-	16:1671185-1677073	757	0.219724	0.187656	0.124574	0.116612	0.0600333	0.182469	4	3	2	2	1	3
NONRATT001889.2	NONRATT001889.2	-	-	-	1:276727961-276728408	448	0.928276	1.26846	1.57867	1.47788	0.710287	1.84963	10	12	15	15	7	18
NONRATT018066.2	NONRATT018066.2	PMID24510058	Cep110.cSep08	-	3:14363288-14368103	713	0	0.199236	0	0	0	0	0	3	0	0	0	0
NONRATT018518.2	NONRATT018518.2	PMID24510058	shorchoy.aSep08-unspliced	-	3:113395600-113396411	812	1.9974	1.8662	2.96132	2.4462	1.34361	2.32447	39	32	51	45	24	41
NONRATT023361.2	NONRATT023361.2	PMID24510058	Bnc2.bSep08	-	5:102680326-102689769	610	0.749919	1.00921	1.93231	1.3025	1.71396	2.2641	11	13	25	18	23	30
NONRATT012140.2	NONRATT012140.2	-	-	-	16:81993853-82001656	751	41.1442	30.4557	32.081	33.0314	35.3496	21.4549	743	483	511	562	584	350
NONRATT005099.2	NONRATT005099.2	PMID24510058	RGD1307394.dSep08	-	10:105795461-105804231	1047	0.397199	0.542759	0.630438	0.716681	0.738108	0.659552	10	12	14	17	17	15
NONRATT013297.2	NONRATT013297.2	PMID24510058	Tslp.aSep08	-	18:25615250-25617716	612	0.611577	0	1.07854	0.721206	0.37136	0.827468	9	0	14	10	5	11
NONRATT010075.2	NONRATT010075.2	PMID24510058	bleejey.aSep08	-	14:83396074-83405258	706	0.765745	0.201212	0.400718	2.18823	0.45072	1.1737	13	3	6	35	7	18
NONRATT008846.2	NONRATT008846.2	PMID24510058	pokee.bSep08	-	13:73622151-73638073	434	4.31204	5.2374	2.9332	5.89891	4.18967	4.66727	45	48	27	58	40	44
ENSRNOT00000077112	NONRATT032053.1	ensembl	-	AABR07017200.1	15:17650684-17659387	763	0	0.0620601	0	0.0578769	0.0595612	0.060365	0	1	0	1	1	1
NONRATT027911.2	NONRATT027911.2	PMID24510058	teepor.aSep08	-	8:87668227-87673133	358	2.55559	3.30683	3.29248	4.43869	3.42846	1.92891	22	25	25	36	27	15
NONRATT024196.2	NONRATT024196.2	PMID24510058	Laminin_EGF.6.aSep08	-	6:50549118-50550822	279	0.894397	0.67888	0.506916	0.47468	0.651709	1.81509	6	4	3	3	4	11
MSTRG.5431.1	-	-	-	-	12:10048439-10054851	5977	1.01585	1.25972	2.30338	2.07518	1.27012	1.3941	146	159	292	281	167	181
MSTRG.16491.1	-	-	-	-	4:180101543-180102336	662	1.2564	1.43064	2.56397	2.06698	2.7467	2.36442	20	20	36	31	40	34
NONRATT019739.2	NONRATT019739.2	-	-	-	3:138680269-138684477	390	1.3862	0.607075	1.20888	1.13174	0.699393	0.944312	13	5	10	10	6	8
NONRATT013774.2	NONRATT013774.2	PMID24510058	Diap1.fSep08	-	18:31032740-31033372	486	0.342245	0.292296	0.194038	0.272501	0.280621	0.284216	4	3	2	3	3	3
NONRATT031209.2	NONRATT031209.2	PMID24510058	kuty.aSep08-unspliced	-	7:140525233-140525613	381	0.545811	1.49152	1.73246	1.39028	0.715915	1.08751	5	12	14	12	6	9
NONRATT018519.2	NONRATT018519.2	PMID24510058	Serf2.eSep08	-	3:113415804-113417476	1139	10.0043	10.9759	10.8868	9.30076	12.6117	9.78113	274	264	263	240	316	242
NONRATT020110.2	NONRATT020110.2	PMID24510058	RGD1560124.aSep08-unspliced	-	4:6023213-6023543	331	10.8051	10.7298	6.69482	7.46783	7.55341	7.51042	86	75	47	56	55	54
NONRATT022632.2	NONRATT022632.2	PMID24510058	LOC685515.aSep08-unspliced	-	5:145030402-145030669	268	3.87944	2.47378	1.93522	1.64693	1.35692	2.23314	25	14	11	10	8	13
NONRATT013287.2	NONRATT013287.2	PMID24510058	rafy.aSep08-unspliced	-	18:24890772-24891339	568	1.97686	1.6674	1.32812	2.09822	2.08081	2.18833	27	20	16	27	26	27
NONRATT019677.2	NONRATT019677.2	PMID24510058	choychy.aSep08	-	3:121725192-121726060	416	9.797	7.62683	4.53353	7.63955	9.50683	4.31586	98	67	40	72	87	39
ENSRNOT00000085825	NONRATT032812.1	ensembl	-	AABR07045680.1	20:56198049-56199332	795	1.36009	2.08479	2.13503	1.72118	1.20079	1.38974	26	35	36	31	21	24
NONRATT008870.2	NONRATT008870.2	PMID24510058	Klhl20.bSep08-unspliced	-	13:78912784-78914174	1391	0.1495	0.136166	0.169469	0.190386	0.0653749	0.0993019	5	4	5	6	2	3
NONRATT027818.2	NONRATT027818.2	-	-	-	8:72087692-72094401	449	0.370448	0.527304	0.630082	0.491562	0.506174	0.410113	4	5	6	5	5	4
NONRATT007148.2	NONRATT007148.2	PMID24510058	Eif4g1.cSep08	-	11:83921583-83926546	670	0.993141	2.26172	0	0	0.542767	0	16	32	0	0	8	0
NONRATT006720.2	NONRATT006720.2	PMID24510058	tomaw.aSep08-unspliced	-	11:84327711-84329437	1727	0.0722341	0.0274186	0	0.0255704	0	0.0533123	3	1	0	1	0	2
NONRATT023161.2	NONRATT023161.2	PMID24510058	Oprs1.cSep08	-	5:58122345-58124577	962	2.33442	0.738383	2.00944	1.78944	1.08682	1.29207	54	15	41	39	23	27
NONRATT012957.2	NONRATT012957.2	PMID24510058	LOC498750.bSep08	-	17:42257841-42260611	800	3.89879	4.38028	3.12355	3.20016	4.82994	4.89133	75	74	53	58	85	85
NONRATT012442.2	NONRATT012442.2	PMID24510058	Cdkal1.bSep08	-	17:36451039-36501972	678	0.245326	0.209522	0.208598	0.2604	0.201153	0.20373	4	3	3	4	3	3
NONRATT009727.2	NONRATT009727.2	PMID24510058	Ptpn13.gSep08	-	14:7696011-7697597	529	2.43702	1.70082	3.74339	2.75352	3.60917	1.65348	31	19	42	33	42	19
NONRATT001018.2	NONRATT001018.2	PMID24510058	RGD1308929.eSep08	-	1:165724423-165865139	559	1.56229	1.27071	2.02429	1.73717	1.54506	0.905922	21	15	24	22	19	11
NONRATT012569.2	NONRATT012569.2	PMID24510058	lerfer.bSep08	-	17:62463515-62464742	753	0.552281	1.00621	0.438292	0.762037	0.845176	1.83413	10	16	7	13	14	30
NONRATT001584.2	NONRATT001584.2	PMID24510058	derflo.aSep08	-	1:234670247-234684477	374	0.333552	0.506437	0.378154	0.590137	0.486168	0.123151	3	4	3	5	4	1
NONRATT016915.2	NONRATT016915.2	PMID24510058	keefla.aSep08-unspliced	-	2:247827938-247828920	983	1.22688	1.15615	0.719474	1.2124	1.34108	1.26447	29	24	15	27	29	27
NONRATT007824.2	NONRATT007824.2	PMID24510058	Mcm7.dSep08	-	12:19311587-19313080	491	2.54094	2.12177	1.72846	3.05657	1.66649	2.71903	30	22	18	34	18	29
NONRATT029232.2	NONRATT029232.2	-	-	-	9:17817766-17821795	1649	0.958342	21.0497	5.11798	1.41869	13.8938	3.21053	38	733	179	53	504	115
NONRATT012947.2	NONRATT012947.2	PMID24510058	LOC364713.aSep08-unspliced	-	17:39495326-39495829	504	0.247516	0	0	0.0876192	0	0	3	0	0	1	0	0
NONRATT001751.2	NONRATT001751.2	PMID24510058	myflo.aSep08	-	1:262015022-262027082	404	0.102928	0.117208	0.233422	0.218504	0.22509	0	1	1	2	2	2	0
NONRATT017150.2	NONRATT017150.2	PMID24510058	Phf1.cSep08	-	20:5527305-5528523	375	2.88339	5.05112	3.64616	5.76764	4.24278	5.64711	26	40	29	49	35	46
NONRATT021110.2	NONRATT021110.2	PMID24510058	jerwor.aSep08-unspliced	-	4:7332024-7332493	470	0.353896	0.402995	0.100271	0.0939576	0.193482	0.195895	4	4	1	1	2	2
NONRATT023020.2	NONRATT023020.2	PMID24510058	Tcea1.eSep08	-	5:14496278-14515576	623	2.53661	2.20433	1.89199	1.98379	1.6782	2.069	38	29	25	28	23	28
NONRATT014229.2	NONRATT014229.2	PMID24510058	ploder.aSep08-unspliced	-	19:38123868-38124628	761	2.34988	3.92031	3.96515	3.53813	2.86724	3.69017	43	63	64	61	48	61
NONRATT007953.2	NONRATT007953.2	PMID24510058	flulo.bSep08	-	12:37980124-37981067	469	1.41877	0.807708	2.31216	0.658821	1.64776	1.27608	16	8	23	7	17	13
NONRATT015395.2	NONRATT015395.2	PMID24510058	geeblee.aSep08-unspliced	-	2:187180662-187181400	739	0.056269	0.128151	0.19138	0.0597565	0.0614955	0.124588	1	2	3	1	1	2
NONRATT030699.2	NONRATT030699.2	PMID24510058	LOC680215.aSep08-unspliced	-	7:140285855-140286525	671	1.98332	1.27031	1.19455	1.38139	1.42269	1.23492	32	18	17	21	21	18
NONRATT003670.2	NONRATT003670.2	PMID24510058	Cbwd1.cSep08	-	1:242832102-242837850	555	0.374692	0.426593	0.849484	0.556733	0.737198	0.746559	5	5	10	7	9	9
NONRATT008848.2	NONRATT008848.2	PMID24510058	klorkoy.aSep08-unspliced	-	13:73668949-73669920	972	9.92618	9.84119	10.914	8.62817	10.1953	14.2086	232	202	225	190	218	300
ENSRNOT00000080565	NONRATT032789.1	ensembl	-	AABR07044794.1	20:20892123-20894849	1230	0.0676142	0	0.191652	0.287075	0.184774	0.187154	2	0	5	8	5	5
NONRATT031152.2	NONRATT031152.2	PMID24510058	Bhlhb9.bSep08	-	X:106387859-106389529	614	1.62558	1.38824	2.61082	2.37234	0.962495	1.79942	24	18	34	33	13	24
NONRATT000262.2	NONRATT000262.2	PMID24510058	LOC690502.cSep08	-	1:61437765-61454777	462	2.52043	2.04997	2.95955	2.1019	2.36149	3.08899	28	20	29	22	24	31
NONRATT020860.2	NONRATT020860.2	PMID24510058	slawzey.aSep08-unspliced	-	4:152966562-152968248	1687	1.45445	1.76844	1.20177	1.67454	1.40118	0.955101	59	63	43	64	52	35
NONRATT027063.2	NONRATT027063.2	PMID24510058	Cpsf1.cSep08	-	7:117661780-117662142	286	0.145394	0.165566	0.329728	0.463062	0.31796	0.161044	1	1	2	3	2	1
NONRATT009091.2	NONRATT009091.2	PMID24510058	weelu.aSep08-unspliced	-	13:102696221-102696962	742	0.504427	0.765861	1.58855	2.08206	0.796458	2.72991	9	12	25	35	13	44
NONRATT017126.2	NONRATT017126.2	PMID24510058	Bat5.eSep08	-	20:5092330-5094768	1360	5.13726	0.731203	1.07472	1.55787	1.03619	1.01552	168	21	31	48	31	30
NONRATT006369.2	NONRATT006369.2	PMID24510058	klonor.aSep08-unspliced	-	10:109817300-109818071	772	0.26937	0	0.0610457	0	0.17666	0.238524	5	0	1	0	3	4
NONRATT027824.2	NONRATT027824.2	PMID24510058	WD40.11.aSep08	-	8:72169458-72171894	391	0.425399	0.121105	0.361713	0.564479	0.46503	0.353271	4	1	3	5	4	3
NONRATT026394.2	NONRATT026394.2	PMID24510058	cheeroy.bSep08	-	7:3059894-3074318	630	0.792116	0.45097	0.598745	0.840791	0.938051	1.31529	12	6	8	12	13	18
NONRATT015696.2	NONRATT015696.2	PMID24510058	smeebley.aSep08-unspliced	-	2:210977117-210977464	348	1.434	0.680343	0.67739	0.760996	1.30629	0.661492	12	5	5	6	10	5
NONRATT002491.2	NONRATT002491.2	PMID24510058	RyR.0.aSep08	-	1:88003201-88004251	352	0.354399	0.134522	0.133884	0	0	0	3	1	1	0	0	0
NONRATT011945.2	NONRATT011945.2	PMID24510058	shorger.aSep08-unspliced	-	16:34552988-34553566	579	0.287273	0	0	0	0	0	4	0	0	0	0	0
NONRATT008598.2	NONRATT008598.2	PMID24510058	zawker.aSep08-unspliced	-	13:1945660-1946053	394	1.79438	1.20194	0.83765	1.68043	1.73062	1.75267	17	10	7	15	15	15
NONRATT011858.2	NONRATT011858.2	PMID24510058	Pde4c.aSep08	-	16:20462609-20466359	1311	7.01049	5.85158	7.37257	4.3433	11.0265	6.67188	221	162	205	129	318	190
NONRATT019100.2	NONRATT019100.2	-	-	-	3:4375665-4380541	500	0.415908	0.378815	0.282859	0.353102	0.181873	1.10485	5	4	3	4	2	12
NONRATT027355.2	NONRATT027355.2	PMID24510058	skeyty.aSep08-unspliced	-	7:143840739-143841394	656	0.82411	0.794081	0.718695	0.269133	0.692973	0.491265	13	11	10	4	10	7
NONRATT024803.2	NONRATT024803.2	PMID24510058	LOC681086.dSep08	-	6:10565844-10578169	829	0.60197	0.51413	0.853128	1.01163	0.657999	1.05512	12	9	15	19	12	19
NONRATT005047.2	NONRATT005047.2	PMID24510058	sleeney.aSep08-unspliced	-	10:103395512-103396106	595	0.559163	0.477498	0.713171	0.81603	0.916774	1.00585	8	6	9	11	12	13
NONRATT030764.2	NONRATT030764.2	PMID24510058	RGD1565032.aSep08	-	X:123290596-123309874	235	1.41575	1.41048	1.60515	1.12692	1.54746	0.979572	8	7	8	6	8	5
NONRATT028707.2	NONRATT028707.2	PMID24510058	Fbxl22.bSep08-unspliced	-	8:72203951-72204582	632	0.460632	0.524467	1.11906	0.768256	0.647382	1.16545	7	7	15	11	9	16
NONRATT003017.2	NONRATT003017.2	PMID24510058	MGC72973.aSep08	-	1:168969764-168972649	796	1.2539	1.84422	0	0.332697	1.25637	1.27233	24	31	0	6	22	22
NONRATT016118.2	NONRATT016118.2	PMID24510058	kershoy.aSep08-unspliced	-	2:49454950-49455573	624	0.599816	0.607075	0.906676	0.848875	0.874168	1.03284	9	8	12	12	12	14
NONRATT022913.2	NONRATT022913.2	PMID24510058	charvar.aSep08	-	5:172527183-172528468	405	0.205347	0.233836	0.46569	0.327002	0.336745	0.454669	2	2	4	3	3	4
NONRATT024532.2	NONRATT024532.2	PMID24510058	RGD1309492.cSep08-unspliced	-	6:110987212-110987843	632	1.05286	0.674389	0.895199	0.20955	0.719289	0.509921	16	9	12	3	10	7
NONRATT028028.2	NONRATT028028.2	PMID24510058	Mst1r.bSep08-unspliced	-	8:116699792-116700449	658	0.695214	0.287853	0.214939	0.20127	0.138201	0.209922	11	4	3	3	2	3
NONRATT008053.2	NONRATT008053.2	PMID24510058	beelor.aSep08-unspliced	-	12:46802351-46802728	378	3.19053	3.00659	2.49464	3.9703	4.08876	2.92287	29	24	20	34	34	24
NONRATT013443.2	NONRATT013443.2	PMID24510058	zyfo.aSep08-unspliced	-	18:49382851-49383441	591	0	0.160243	0	0	0	0.155788	0	2	0	0	0	2
NONRATT004734.2	NONRATT004734.2	PMID24510058	Tmem49.eSep08	-	10:73903212-73905142	898	43.5323	53.999	11.6558	13.9596	34.8782	20.8649	940	1024	222	284	689	407
MSTRG.21705.1	-	-	-	-	8:114530357-114546572	2389	2.05412	2.77507	0.710484	0.831441	2.39753	2.06188	118	140	36	45	126	107
NONRATT002485.2	NONRATT002485.2	PMID24510058	borgla.aSep08-unspliced	-	1:87927230-87927663	434	1.53319	2.18222	3.36777	2.13575	2.40902	2.65185	16	20	31	21	23	25
NONRATT009063.2	NONRATT009063.2	PMID24510058	kylu.aSep08-unspliced	-	13:99471868-99472457	590	0.140959	0.160515	0.159834	0.0748476	0.0770258	0.234117	2	2	2	1	1	3
NONRATT027341.2	NONRATT027341.2	PMID24510058	Krt75.bSep08-unspliced	-	7:143219012-143219865	854	0	0	0.0551842	0.103367	0	0	0	0	1	2	0	0
NONRATT026035.2	NONRATT026035.2	PMID24510058	Gsdmd.cSep08-unspliced	-	7:116893214-116893940	727	0.114395	0.3908	0.194539	0.182167	0.187595	0.316643	2	6	3	3	3	5
NONRATT020772.2	NONRATT020772.2	-	-	-	4:145005548-145008404	893	1.02453	1.00754	1.74235	1.48284	1.37446	1.39191	22	19	33	30	27	27
NONRATT017936.2	NONRATT017936.2	PMID24510058	sneecha.aSep08	-	3:6604749-6608973	552	0.0753311	0	0.170837	0	0.0823283	0.0834393	1	0	2	0	1	1
NONRATT029199.2	NONRATT029199.2	PMID24510058	Parc.cSep08	-	9:16841432-16844030	1032	0.322386	0.504765	0.411179	0.556021	0.572647	0.669139	8	11	9	13	13	15
NONRATT028717.2	NONRATT028717.2	PMID24510058	Ccpg1.fSep08-unspliced	-	8:79680115-79680602	488	0.937399	1.16449	1.25603	1.80902	1.5836	0.849058	11	12	13	20	17	9
NONRATT027149.2	NONRATT027149.2	PMID24510058	lersoy.aSep08-unspliced	-	7:122942095-122942482	388	0.643136	1.95277	2.1873	0.910058	1.17162	1.06789	6	16	18	8	10	9
NONRATT007512.2	NONRATT007512.2	PMID24510058	stuler.aSep08-unspliced	-	12:38872633-38873388	756	3.35559	3.82097	3.99138	6.01375	5.29144	3.59279	61	61	64	103	88	59
NONRATT010169.2	NONRATT010169.2	PMID24510058	spykar.aSep08-unspliced	-	14:104589000-104590095	1096	0.0379405	0.0432043	0.258127	0.322174	0.1659	0.0420242	1	1	6	8	4	1
NONRATT020206.2	NONRATT020206.2	PMID24510058	vorwoy.aSep08-unspliced	-	4:26250606-26251108	503	0.413427	0.753111	0.749919	0.263292	0.632622	0.73217	5	8	8	3	7	8
NONRATT001712.2	NONRATT001712.2	PMID24510058	LOC685933.aSep08-unspliced	-	1:257517533-257517956	424	0.196145	0.335037	0.222411	0.312348	0.321655	0.325776	2	3	2	3	3	3
NONRATT019625.2	NONRATT019625.2	PMID24510058	Hisppd2a.jSep08-unspliced	-	3:113283926-113284301	376	1.99088	1.63729	1.7555	1.87832	2.29705	1.46921	18	13	14	16	19	12
NONRATT023869.2	NONRATT023869.2	PMID24510058	parwee.aSep08-unspliced	-	5:166049196-166050930	1735	3.73925	3.76653	4.13057	4.22319	4.84712	3.79432	156	138	152	166	185	143
ENSRNOT00000076620	NONRATT032847.1	ensembl	-	Lace1	20:47038825-47044786	863	15.9024	14.0473	25.5683	20.1008	15.0122	24.6984	330	256	468	393	285	463
NONRATT008640.2	NONRATT008640.2	PMID24510058	peeker.aSep08-unspliced	-	13:28005348-28006197	850	0.0978418	0.334249	0.332832	0.311561	0.106984	0.216636	2	6	6	6	2	4
NONRATT015070.2	NONRATT015070.2	PMID24510058	skashoy.aSep08-unspliced	-	2:56104657-56105818	1162	7.83786	5.70537	7.42527	7.21737	6.494	8.59708	219	140	183	190	166	217
NONRATT019736.2	NONRATT019736.2	PMID24510058	Snx5.eSep08	-	3:138384949-138386869	702	2.48814	2.36098	2.82087	2.5151	2.65493	2.492	42	35	42	40	41	38
NONRATT025412.2	NONRATT025412.2	PMID24510058	sporvu.aSep08-unspliced	-	6:141620495-141621422	928	0.044809	0.0510257	0.0507837	0	0.0979919	0.049632	1	1	1	0	2	1
NONRATT003212.2	NONRATT003212.2	PMID24510058	Zfp688.bSep08	-	1:198866278-198868667	420	0.29702	0.225485	0.112208	1.36622	0.216515	0.109663	3	2	1	13	2	1
NONRATT023919.2	NONRATT023919.2	PMID24510058	zorvar.bSep08-unspliced	-	5:171306261-171308634	2374	32.2853	39.1962	36.1259	49.4203	34.084	43.7672	1843	1965	1819	2658	1780	2257
NONRATT006805.2	NONRATT006805.2	PMID24510058	snolor.aSep08	-	11:11139515-11147254	382	0.326566	0.371873	0.617099	0.34669	0.35702	0.482044	3	3	5	3	3	4
NONRATT025085.2	NONRATT025085.2	PMID24510058	gotor.aSep08-unspliced	-	6:92423412-92425557	2146	2.18981	2.11839	1.80156	2.30366	1.84289	1.65181	113	96	82	112	87	77
NONRATT029246.2	NONRATT029246.2	PMID24510058	Enpp4.cSep08	-	9:19448469-19451916	483	3.78849	3.62756	3.12369	3.83825	3.85872	3.9078	44	37	32	42	41	41
NONRATT027278.2	NONRATT027278.2	PMID24510058	pleyta.aSep08-unspliced	-	7:137671791-137672464	674	2.28297	1.47542	4.33706	4.19132	4.11416	3.34681	37	21	62	64	61	49
NONRATT003845.2	NONRATT003845.2	PMID24510058	noyflo.aSep08	-	1:265504107-265504597	400	4.88648	3.07799	2.00386	1.32425	1.81827	1.95655	47	26	17	12	16	17
NONRATT018334.2	NONRATT018334.2	-	-	-	3:73789895-73790329	435	6.979	6.64058	5.20256	6.39263	6.89704	4.76232	73	61	48	63	66	45
NONRATT025989.2	NONRATT025989.2	PMID24510058	moysey.aSep08-unspliced	-	7:102708962-102709461	500	0.166331	0.0947037	0	0.0883201	0.81829	0.092117	2	1	0	1	9	1
NONRATT027157.2	NONRATT027157.2	PMID24510058	Fam152b.dSep08	-	7:123242584-123259570	701	0.296653	0.135098	0.134525	0.125928	0.194553	0.394025	5	2	2	2	3	6
NONRATT030043.2	NONRATT030043.2	PMID24510058	glerpo.aSep08-unspliced	-	9:65239554-65240138	585	0.213245	0.0809434	0	0.150898	0.155447	0.0787325	3	1	0	2	2	1
NONRATT029538.2	NONRATT029538.2	PMID24510058	meypaw.aSep08-unspliced	-	9:82582313-82582958	646	0.128739	0.2199	0.948825	0.683248	0.422234	0.783917	2	3	13	10	6	11
NONRATT006507.2	NONRATT006507.2	PMID24510058	bawloy.bSep08	-	11:38380198-38381547	646	0.257478	0.439801	0.510889	0.341658	0.211117	0.712619	4	6	7	5	3	10
NONRATT028519.2	NONRATT028519.2	PMID24510058	Rbm7.cSep08	-	8:52827627-52828927	403	2.57987	2.70258	1.87189	2.40962	2.59433	1.94199	25	23	16	22	23	17
NONRATT002232.2	NONRATT002232.2	PMID24510058	skawfly.aSep08	-	1:62374601-62381448	330	1.51222	1.43505	1.14306	1.20383	2.20396	0.837004	12	10	8	9	16	6
NONRATT010177.2	NONRATT010177.2	PMID24510058	ployjey.bSep08	-	14:108326568-108331108	246	0.338071	0.192487	0.383343	0.358844	0.369661	0.18723	2	1	2	2	2	1
NONRATT011739.2	NONRATT011739.2	PMID24510058	Gnl3.dSep08	-	16:7097580-7103524	2850	2.97677	2.79143	2.64693	2.15279	2.67964	1.84144	204	168	160	139	168	114
NONRATT009407.2	NONRATT009407.2	-	-	-	14:65549366-65549805	440	0.378025	0.322854	0.535754	0.902869	0.413243	0.418502	4	3	5	9	4	4
NONRATT016310.2	NONRATT016310.2	PMID24510058	floblu.aSep08-unspliced	-	2:118926910-118927656	747	0	0.0633894	0	0	0.060837	0.061658	0	1	0	0	1	1
NONRATT002193.2	NONRATT002193.2	PMID24510058	TSP_3.0.aSep08	-	1:56661958-56667785	917	0.0453465	0.0516378	0.102838	0.192531	0.347011	0.200808	1	1	2	4	7	4
NONRATT019716.2	NONRATT019716.2	PMID24510058	RGD735140.dSep08-unspliced	-	3:125172416-125173293	878	2.13146	1.67198	3.0072	2.01093	1.34613	2.04487	45	31	56	40	26	39
NONRATT007028.2	NONRATT007028.2	PMID24510058	Ccdc58.cSep08	-	11:67598428-67618155	385	0	0	0	0.687862	0.354238	0.59792	0	0	0	6	3	5
NONRATT024474.2	NONRATT024474.2	PMID24510058	flortoy.aSep08-unspliced	-	6:106600452-106601824	1373	0.0908582	0.137952	0.137367	0.0964571	0.0993312	0.100604	3	4	4	3	3	3
NONRATT022315.2	NONRATT022315.2	PMID24510058	C2.5.aSep08	-	5:78467457-78479664	329	0	0.143927	0	0.134225	0.138131	0.139995	0	1	0	1	1	1
NONRATT021627.2	NONRATT021627.2	PMID24510058	Slc6a6.bSep08	-	4:123671731-123713347	833	1.4478	1.70546	2.77345	2.80842	2.5103	2.1001	29	30	49	53	46	38
NONRATT000185.2	NONRATT000185.2	PMID24510058	Park2.aSep08	-	1:48879688-48905124	742	0	0	0.0635139	0.0595149	0.0612469	0.310242	0	0	1	1	1	5
NONRATT021716.2	NONRATT021716.2	PMID24510058	LOC680689.aSep08	-	4:146554767-146560374	672	2.35165	4.50998	2.38548	1.9705	6.62928	3.01428	38	64	34	30	98	44
NONRATT011295.2	NONRATT011295.2	PMID24510058	Btd.mSep08	-	16:7758234-7784175	546	1.98035	1.90804	1.29532	1.61685	0	1.26475	26	22	15	20	0	15
NONRATT000004.2	NONRATT000004.2	PMID24510058	bloflo.aSep08-unspliced	-	1:1702209-1702943	735	4.80938	5.86293	1.47538	0.360309	0.989534	0.375798	85	91	23	6	16	6
NONRATT026208.2	NONRATT026208.2	PMID24510058	vasa.aSep08	-	7:127104825-127178802	269	0.773063	0.352059	0.525761	0.984486	0.506995	0.684538	5	2	3	6	3	4
MSTRG.4913.6	-	-	-	-	11:57265790-57277305	11453	0	0	0	4.96781	0	0	0	0	0	1289	0	0
MSTRG.4913.4	-	-	-	-	11:57265732-57277293	11495	0.231542	0.29249	5.66847	0	3.43259	0.768934	64	71	1382	0	868	192
MSTRG.4913.5	-	-	-	-	11:57265761-57277287	11486	0.438102	0.461753	2.88161	3.03207	4.1437	1.41082	121	112	702	789	1047	352
NONRATT001560.2	NONRATT001560.2	PMID24510058	garkly.aSep08-unspliced	-	1:227609340-227609874	535	0	0.0885082	0	0.165001	0	0	0	1	0	2	0	0
NONRATT019699.2	NONRATT019699.2	PMID24510058	bloysha.aSep08-unspliced	-	3:123589285-123589830	546	0	0.17345	0.172715	0.0808793	0.16655	0.590238	0	2	2	1	2	7
NONRATT030134.2	NONRATT030134.2	-	-	-	9:78332715-78342157	416	0.199917	0	0.226688	0	0	0.221323	2	0	2	0	0	2
NONRATT007645.2	NONRATT007645.2	PMID24510058	rudaw.aSep08-unspliced	-	12:50242337-50243020	684	0.0607935	0.138456	0.0688996	0.129058	0.0664404	0.403818	1	2	1	2	1	6
NONRATT029779.2	NONRATT029779.2	PMID24510058	kerpa.aSep08-unspliced	-	9:14541167-14541904	738	1.01432	0.449137	1.59716	1.49527	1.41669	1.18522	18	7	25	25	23	19
NONRATT021637.2	NONRATT021637.2	PMID24510058	zozee.aSep08-unspliced	-	4:123875884-123876293	410	0.91289	2.07898	1.72498	3.55272	2.66099	2.35796	9	18	15	33	24	21
NONRATT007419.2	NONRATT007419.2	PMID24510058	plerlee.aSep08-unspliced	-	12:27413521-27414236	716	0.0580765	0	0.0658202	0.184966	0	0.12859	1	0	1	3	0	2
NONRATT000199.2	NONRATT000199.2	PMID24510058	snoflee.aSep08-unspliced	-	1:47955884-47956544	661	0.125818	0.143273	0.071297	0.066808	0.0687522	0.13929	2	2	1	1	1	2
NONRATT021608.2	NONRATT021608.2	PMID24510058	Podxl2.cSep08	-	4:120804739-120807668	401	0	0.118084	0	0.220139	0.11333	0	0	1	0	2	1	0
NONRATT026122.2	NONRATT026122.2	PMID24510058	spoysor.aSep08-unspliced	-	7:121335543-121337091	1549	8.34965	9.96617	10.775	0	11.3865	0	311	326	354	0	388	0
NONRATT004461.2	NONRATT004461.2	-	-	-	10:56524473-56525414	745	0.558212	0.699218	1.26574	1.24418	1.40338	0.741507	10	11	20	21	23	12
NONRATT028530.2	NONRATT028530.2	PMID24510058	slyru.aSep08-unspliced	-	8:53836793-53837544	752	0.165889	0.188904	0.125402	0.352163	0.664941	0.122434	3	3	2	6	11	2
NONRATT023824.2	NONRATT023824.2	PMID24510058	LOC691257.aSep08	-	5:164213032-164227422	456	0.54723	0.623051	1.03391	0.774347	0.697826	0.908641	6	6	10	8	7	9
NONRATT014712.2	NONRATT014712.2	PMID24510058	Aars.bSep08	-	19:43194139-43196408	598	1.73861	0.63347	2.68067	0.369082	1.29231	0.461892	25	8	34	5	17	6
NONRATT014180.2	NONRATT014180.2	PMID24510058	Rbmxrtl.aSep08	-	19:33081480-33084990	1616	6.81968	8.52734	8.49022	5.40822	5.87916	7.94804	265	291	291	198	209	279
MSTRG.6858.1	-	-	-	-	14:5144446-5150967	5112	3.4656	4.22411	7.96874	7.95243	6.6871	8.44715	426	456	864	921	752	938
NONRATT029765.2	NONRATT029765.2	PMID24510058	kleynoy.aSep08-unspliced	-	9:4496413-4497201	789	1.58125	1.08033	1.25488	1.23077	1.44037	1.517	30	18	21	22	25	26
NONRATT023638.2	NONRATT023638.2	PMID24510058	snerwo.aSep08-unspliced	-	5:147346041-147346559	519	0.801287	0.912457	1.181	1.10561	1.13867	1.15314	10	10	13	13	13	13
NONRATT014629.2	NONRATT014629.2	PMID24510058	Agrp.aSep08	-	19:37526414-37527172	409	0.711784	0.578874	0.80693	0.323804	0.222339	0.112613	7	5	7	3	2	1
NONRATT005720.2	NONRATT005720.2	PMID24510058	kano.aSep08-unspliced	-	10:63712276-63713197	922	2.11995	3.90339	6.75008	5.98424	5.71922	4.64354	47	76	132	125	116	93
NONRATT027177.2	NONRATT027177.2	PMID24510058	LOC688851.aSep08-unspliced	-	7:124076558-124076929	372	0.447126	0.50916	0.507002	0.2373	0.488782	0.495002	4	4	4	2	4	4
ENSRNOT00000086935	NONRATT033662.1	ensembl	-	AABR07069987.1	8:44366166-44368047	1241	0	0.0381562	0.113964	0	0.219793	0.111305	0	1	3	0	6	3
ENSRNOT00000086931	ENSRNOT00000086931	ensembl:lincRNA	-	AABR07035780.4	12:22338800-22340141	613	0.407075	0.772537	0.384554	0.288012	0.519101	0.375529	6	10	5	4	7	5
NONRATT002651.2	NONRATT002651.2	PMID24510058	Nucb1.cSep08	-	1:101486546-101500820	843	2.21996	2.02225	3.46759	3.35107	3.61294	3.00351	45	36	62	64	67	55
NONRATT017690.2	NONRATT017690.2	-	-	-	20:14287470-14296050	2914	0.04281	0.0487494	0.0647236	0.0908808	0.0623977	0.0474018	3	3	4	6	4	3
NONRATT000359.2	NONRATT000359.2	PMID24510058	zf-C2H2.110.aSep08-unspliced	-	1:72362799-72363539	741	0.392874	0	0	0.0595952	0	0	7	0	0	1	0	0
NONRATT020373.2	NONRATT020373.2	PMID24510058	Luc7l2.aSep08	-	4:66290334-66354711	2620	0.190471	0.23497	0.305933	0.336947	0.242907	0.105424	12	13	17	20	14	6
NONRATT001539.2	NONRATT001539.2	PMID24510058	snorkla.aSep08-unspliced	-	1:226086835-226088509	1675	1.14209	1.13085	1.60445	1.10679	0.977008	1.29175	46	40	57	42	36	47
NONRATT019319.2	NONRATT019319.2	PMID24510058	forchy.aSep08	-	3:46387682-46389816	395	0.105273	0.239756	0.11931	0.111798	0.115051	0.116604	1	2	1	1	1	1
NONRATT007321.2	NONRATT007321.2	PMID24510058	Tmem184a.dSep08-unspliced	-	12:16917426-16917878	453	0.550854	0.731707	1.24893	1.07183	1.70596	0.914658	6	7	12	11	17	9
NONRATT014280.2	NONRATT014280.2	PMID24510058	RGD1559899.aSep08-unspliced	-	19:43167529-43167923	395	0	0	0.11931	0	0.115051	0.116604	0	0	1	0	1	1
NONRATT004079.2	NONRATT004079.2	PMID24510058	Caskin1.dSep08	-	10:13867322-13867999	588	0.070719	0.402652	0	0.450386	0.386517	0.156582	1	5	0	6	5	2
NONRATT023602.2	NONRATT023602.2	-	-	-	5:144251114-144274865	2675	1.95887	2.31905	1.35717	1.12206	3.39874	1.56608	126	131	77	68	200	91
NONRATT019831.2	NONRATT019831.2	PMID24510058	gloshu.aSep08-unspliced	-	3:149836375-149837263	889	0.98236	1.17186	1.75019	1.29092	1.73853	1.55355	21	22	33	26	34	30
NONRATT018619.2	NONRATT018619.2	PMID24510058	glasha.aSep08-unspliced	-	3:123757886-123758793	908	8.42735	8.553	8.67157	8.3613	8.51085	9.0754	184	164	167	172	170	179
NONRATT008631.2	NONRATT008631.2	PMID24510058	boyker.aSep08-unspliced	-	13:25512116-25513827	1712	0.461538	1.13407	1.76255	1.16023	0.477946	1.31761	19	41	64	45	18	49
NONRATT002722.2	NONRATT002722.2	PMID24510058	vawglu.aSep08-unspliced	-	1:116588332-116588815	484	0	0.0978344	0.0973705	0	0	0.190228	0	1	1	0	0	2
NONRATT025278.2	NONRATT025278.2	PMID24510058	sputu.bSep08	-	6:124929910-124932555	375	0.887206	1.26284	1.25724	0.823965	0.484872	1.22761	8	10	10	7	4	10
NONRATT023516.2	NONRATT023516.2	PMID24510058	Dmap1.bSep08	-	5:136533787-136535825	882	0.612943	0.859044	0.641458	0.500429	0.721562	0.626329	13	16	12	10	14	12
NONRATT021792.2	NONRATT021792.2	PMID24510058	Hsn2.aSep08-unspliced	-	4:152489179-152490483	1305	3.4417	1.77807	6.61162	6.29121	2.43838	7.05535	108	49	183	186	70	200
NONRATT016386.2	NONRATT016386.2	PMID24510058	Fam48a.gSep08	-	2:143892698-143905048	673	2.03922	2.74416	2.66218	1.63969	1.75616	1.50487	33	39	38	25	26	22
NONRATT026732.2	NONRATT026732.2	PMID24510058	Ppp1r12a.fSep08	-	7:51424203-51425672	436	0.763079	0.868842	1.08134	0.708685	1.04264	1.58383	8	8	10	7	10	15
NONRATT015228.2	NONRATT015228.2	PMID24510058	kershee.cSep08	-	2:122438819-122444911	466	1.51714	0.914621	1.11296	0.947163	1.3657	1.18546	17	9	11	10	14	12
NONRATT016275.2	NONRATT016275.2	PMID24510058	gorshee.aSep08	-	2:109360164-109366460	456	0.182381	0.311525	0.516956	0.290429	0.299083	0.302914	2	3	5	3	3	3
NONRATT020543.2	NONRATT020543.2	-	-	-	4:99133835-99146147	773	13.2885	13.0485	7.13632	11.1349	11.6438	11.7323	247	213	117	195	198	197
NONRATT004065.2	NONRATT004065.2	PMID24510058	Srrm2.fSep08	-	10:13159814-13160408	371	9.07969	11.6152	12.5814	13.5632	11.0275	11.54	81	91	99	114	90	93
NONRATT015212.2	NONRATT015212.2	PMID24510058	glerblu.aSep08-unspliced	-	2:119315627-119317503	1877	0.265868	0.126137	0.100482	0.399768	0.363272	0.171694	12	5	4	17	15	7
NONRATT016661.2	NONRATT016661.2	-	-	-	2:196495868-196497120	1136	0.878615	0.54192	0.954582	0.85482	0.880344	0.851024	24	13	23	22	22	21
NONRATT014440.2	NONRATT014440.2	PMID24510058	jadar.bSep08	-	19:9563726-9581577	512	0	0	0	0.0862501	0.17761	0	0	0	0	1	2	0
NONRATT023417.2	NONRATT023417.2	PMID24510058	Jak1.bSep08-unspliced	-	5:119986332-119987188	857	1.11613	0.773597	1.43038	1.39065	1.90955	1.45038	23	14	26	27	36	27
NONRATT023784.2	NONRATT023784.2	PMID24510058	Clcnkb.fSep08	-	5:159954108-159955935	805	9.50563	12.5298	16.5166	16.9979	17.4491	16.3557	184	213	282	310	309	286
NONRATT011140.2	NONRATT011140.2	PMID24510058	LOC692032.bSep08	-	15:83430600-83437049	747	2.28259	1.71164	1.1992	0.945447	1.46052	1.29419	41	27	19	16	24	21
NONRATT017172.2	NONRATT017172.2	PMID24510058	kerda.aSep08-unspliced	-	20:6357941-6358869	929	10.2513	13.61	0.253748	0.142557	5.67612	3.4688	229	267	5	3	116	70
NONRATT029937.2	NONRATT029937.2	PMID24510058	Mgat4a.bSep08	-	9:44085448-44126796	668	0.622557	0.070886	0	0	0.0680317	0	10	1	0	0	1	0
ENSRNOT00000079422	NONRATT032066.1	ensembl	-	AABR07017649.1	15:29664637-29667058	404	0.102928	0.117208	0.116652	0.109307	0	0.114006	1	1	1	1	0	1
ENSRNOT00000079427	NONRATT032852.1	ensembl	-	AABR07051218.1	3:1643938-1645501	279	0.149042	0.8486	0.338001	0.47468	0.325937	0.660003	1	5	2	3	2	4
NONRATT014011.2	NONRATT014011.2	PMID24510058	judar.aSep08	-	19:9808326-9820394	911	0.136936	0.103956	0.0517314	0.242274	0.149706	0.0505582	3	2	1	5	3	1
NONRATT027827.2	NONRATT027827.2	-	-	-	8:72441719-72442234	516	23.6144	28.633	35.4526	37.9808	32.4197	38.0957	293	312	388	444	368	427
MSTRG.19549.2	-	-	-	-	7:22437711-22438604	830	1.95408	0.0570505	0	1.43589	0	3.05055	39	1	0	27	0	55
NONRATT018603.2	NONRATT018603.2	PMID24510058	vorsha.aSep08-unspliced	-	3:122970799-122971508	710	0.468595	0.533542	0.929674	0.870385	0.704275	0.583578	8	8	14	14	11	9
NONRATT028932.2	NONRATT028932.2	PMID24510058	Atp2c1.cSep08	-	8:113987797-113992451	375	1.55264	1.01017	1.50871	1.53017	0.969744	0.859386	14	8	12	13	8	7
NONRATT011671.2	NONRATT011671.2	PMID24510058	RGD1311612.cSep08	-	16:83303344-83310828	1080	0.88567	2.19235	1.8772	3.10616	2.44126	2.89856	23	50	43	76	58	68
NONRATT020296.2	NONRATT020296.2	PMID24510058	plerwer.aSep08	-	4:56547734-56550582	906	5.73776	5.8017	3.17445	3.06931	3.86341	2.84549	125	111	61	63	77	56
NONRATT017344.2	NONRATT017344.2	PMID24510058	flerdy.aSep08-unspliced	-	20:21831280-21831692	413	0.302054	1.03199	0.570779	0.427485	0.660444	0.668792	3	9	5	4	6	6
NONRATT029332.2	NONRATT029332.2	PMID24510058	topu.aSep08-unspliced	-	9:45680708-45681704	997	0.0834158	0.0474944	0.141855	3.49753	0.0912101	0.0923475	2	1	3	79	2	2
NONRATT015196.2	NONRATT015196.2	PMID24510058	teyblu.aSep08-unspliced	-	2:115353321-115354201	881	0.0471995	0.107496	0.21408	0.100199	0.0515837	0.261293	1	2	4	2	1	5
NONRATT020058.2	NONRATT020058.2	PMID24510058	Arfrp1.fSep08	-	3:176859261-176860046	713	1.63315	1.79326	1.65317	3.03347	2.80525	1.6787	28	27	25	49	44	26
NONRATT008835.2	NONRATT008835.2	PMID24510058	pakee.aSep08	-	13:72866516-72869396	292	2.27878	2.27046	2.42207	4.83717	2.95784	2.99552	16	14	15	32	19	19
NONRATT000906.2	NONRATT000906.2	PMID24510058	Irak1.eSep08-unspliced	-	X:156719592-156720467	876	1.04441	1.24331	1.45321	1.05812	1.19351	0.840826	22	23	27	21	23	16
NONRATT012181.2	NONRATT012181.2	PMID24510058	RGD1309592.eSep08	-	17:823959-825066	632	0.197387	0	0.372993	0	0.215794	0	3	0	5	0	3	0
NONRATT016993.2	NONRATT016993.2	-	-	-	2:264836577-264844317	3194	1.41922	1.86808	2.15518	2.19732	2.14908	1.9458	109	126	146	159	151	135
NONRATT022910.2	NONRATT022910.2	PMID24510058	Pank4.fSep08-unspliced	-	5:172367600-172368042	443	0.187733	0.213778	0.106382	0.199268	0.102585	0.207834	2	2	1	2	1	2
NONRATT019525.2	NONRATT019525.2	PMID24510058	kachor.aSep08-unspliced	-	3:94349783-94351148	1366	36.2899	33.6613	32.6863	35.9969	34.809	38.3184	1192	971	947	1114	1046	1137
NONRATT013747.2	NONRATT013747.2	PMID24510058	RGD1311742.cSep08	-	18:28446594-28452803	292	0.142407	0.162164	0.161395	0.151233	0.155634	0.157735	1	1	1	1	1	1
NONRATT007260.2	NONRATT007260.2	PMID24510058	valo.aSep08	-	12:9394544-9413804	771	0.0539335	0.0614162	0.0611249	0.114495	0.0589432	0.179156	1	1	1	2	1	3
NONRATT023334.2	NONRATT023334.2	PMID24510058	shovoy.aSep08-unspliced	-	5:92862229-92865113	2885	0.201816	0.443187	32.5218	0.443696	0.929638	0.702113	14	27	1990	29	59	44
NONRATT015097.2	NONRATT015097.2	-	-	-	2:62019902-62034668	3354	2.50465	3.19086	9.03888	8.09362	6.09902	5.51773	202	226	643	615	450	402
NONRATT020270.2	NONRATT020270.2	PMID24510058	zarza.aSep08-unspliced	-	4:48308856-48309267	412	0.403716	0.114932	0.114387	0.749968	0.441327	0.111793	4	1	1	7	4	1
NONRATT008704.2	NONRATT008704.2	PMID24510058	Mdm4.dSep08	-	13:49796549-49806857	1438	7.08544	10.1098	11.8035	11.4494	9.35717	10.8207	245	307	360	373	296	338
NONRATT011463.2	NONRATT011463.2	PMID24510058	Cpe.aSep08-unspliced	-	16:26906514-26907114	601	0.899528	1.1819	1.4121	1.39541	2.11786	1.83834	13	15	18	19	28	24
NONRATT015982.2	NONRATT015982.2	PMID24510058	Aggf1.cSep08	-	2:25091611-25095033	399	1.56346	1.42423	1.53619	0.884968	1.70893	1.84602	15	12	13	8	15	16
ENSRNOT00000080327	NONRATT033748.1	ensembl	-	AABR07067767.1	9:62573888-62586135	530	0.470824	0.982863	1.15649	0.582994	0.943463	1.04231	6	11	13	7	11	12
NONRATT013968.2	NONRATT013968.2	PMID24510058	rerfee.aSep08-unspliced	-	18:80925995-80926623	629	1.98347	2.71027	2.92333	2.87713	3.3967	3.95222	30	36	39	41	47	54
NONRATT020083.2	NONRATT020083.2	PMID24510058	jyshaw.aSep08-unspliced	-	3:173962127-173963500	1374	0.786952	0.103388	0.102933	0.160634	0.0992589	0.134018	26	3	3	5	3	4
NONRATT017586.2	NONRATT017586.2	PMID24510058	Rab2l.dSep08	-	20:5463874-5465087	872	1.28768	0.923198	1.35173	1.21485	0.938353	1.26702	27	17	25	24	18	24
NONRATT008083.2	NONRATT008083.2	PMID24510058	Iscu.cSep08	-	12:48625644-48627241	345	0.964354	1.78441	2.04998	1.15149	1.44938	1.06748	8	13	15	9	11	8
NONRATT028304.2	NONRATT028304.2	PMID24510058	Zfp426.aSep08	-	8:21518714-21542775	680	1.83471	3.62123	4.36817	4.0894	3.40934	3.7912	30	52	63	63	51	56
NONRATT029642.2	NONRATT029642.2	PMID24510058	DAGK_cat.1.bSep08	-	9:95047351-95050183	537	0.774428	0.705428	0.877959	0.657546	1.01579	0.60013	10	8	10	8	12	7
ENSRNOT00000087909	ENSRNOT00000087909	ensembl:antisense	-	Rn60_20_0032.5	20:3170034-3199279	1866	0.958339	0.5583	0.151611	0.638686	0.706474	0.197364	43	22	6	27	29	8
NONRATT004995.2	NONRATT004995.2	PMID24510058	Ccdc45.cSep08	-	10:95002753-95004415	368	1.01708	1.93023	1.53741	1.1994	1.48228	1.50115	9	15	12	10	12	12
NONRATT001297.2	NONRATT001297.2	PMID24510058	LOC502371.aSep08	-	1:205138756-205139505	750	0.55449	0	0	0	0	0	10	0	0	0	0	0
NONRATT015752.2	NONRATT015752.2	PMID24510058	glorblor.aSep08-unspliced	-	2:225848874-225850690	1817	521.545	594.265	555.479	799.085	588.978	550.887	22787	22802	21407	32894	23542	21743
NONRATT018506.2	NONRATT018506.2	PMID24510058	veechy.aSep08	-	3:112658499-112659555	668	0.124499	0.283544	0.564684	0.132149	0.272196	0.20678	2	4	8	2	4	3
NONRATT007978.2	NONRATT007978.2	PMID24510058	florlo.aSep08	-	12:38852515-38854389	737	0.338584	0.513996	0.447808	1.55716	0.801862	1.87395	6	8	7	26	13	30
NONRATT004989.2	NONRATT004989.2	PMID24510058	Psmc5.dSep08	-	10:94450846-94451812	664	2.56791	2.56741	2.4852	2.79198	2.87538	3.32792	41	36	35	42	42	48
NONRATT009949.2	NONRATT009949.2	-	-	-	14:66750274-66771668	914	0.773509	0.414458	0.412702	0.0965816	0	1.00734	17	8	8	2	0	20
NONRATT012407.2	NONRATT012407.2	PMID24510058	LOC498354.aSep08	-	17:30191301-30230133	4905	0	0.0096538	0.00960801	0	0.0185396	0	0	1	1	0	2	0
NONRATT007257.2	NONRATT007257.2	PMID24510058	torlo.bSep08	-	12:9204953-9205884	652	0	0	0	0.203122	0	0	0	0	0	3	0	0
NONRATT005103.2	NONRATT005103.2	PMID24510058	RGD1307394.fSep08-unspliced	-	10:105801126-105801380	255	3.58785	3.15697	3.88276	4.3275	3.03058	2.70804	22	17	21	25	17	15
NONRATT017555.2	NONRATT017555.2	PMID24510058	Bat1a.dSep08-unspliced	-	20:4806945-4808550	1606	4.27265	4.0101	7.60362	0.522192	3.93442	1.9779	165	136	259	19	139	69
NONRATT001287.2	NONRATT001287.2	PMID24510058	Bub3.eSep08	-	1:203529118-203532733	743	0.447782	0.892292	1.14222	1.00991	1.04011	0.433741	8	14	18	17	17	7
NONRATT003308.2	NONRATT003308.2	PMID24510058	glawglor.aSep08-unspliced	-	1:211200796-211201135	340	2.81331	3.34262	5.1308	5.3227	3.07505	4.06207	23	24	37	41	23	30
NONRATT010354.2	NONRATT010354.2	PMID24510058	smorju.aSep08-unspliced	-	15:25956887-25960089	3203	4.11587	3.26737	5.77026	4.56144	5.27955	5.96471	317	221	392	331	372	415
NONRATT003778.2	NONRATT003778.2	PMID24510058	mawflo.aSep08-unspliced	-	1:261386891-261387742	852	0.0488061	0.166732	0.165997	0.259051	0.213412	0.162123	1	3	3	5	4	3
NONRATT015952.2	NONRATT015952.2	PMID24510058	Vcan.bSep08-unspliced	-	2:18491398-18492473	1076	0.347849	0.0440073	0.525805	0.246122	0.0422353	0.0855673	9	1	12	6	1	2
NONRATT015728.2	NONRATT015728.2	PMID24510058	MGC124992.fSep08-unspliced	-	2:219623281-219624071	791	0.525749	0.658555	0.357657	0.558	0.51725	0.93118	10	11	6	10	9	16
MSTRG.7184.2	-	-	-	-	14:46593252-46595115	388	5.78791	6.83465	6.80495	20.4772	13.942	6.64438	54	56	56	180	119	56
NONRATT024397.2	NONRATT024397.2	PMID24510058	blertor.aSep08-unspliced	-	6:96836409-96837241	833	1.94704	1.81915	1.47159	2.27856	2.23741	2.04481	39	32	26	43	41	37
NONRATT001907.2	NONRATT001907.2	PMID24510058	Spt4.0.aSep08-unspliced	-	1:280044979-280045565	587	0.566784	0.968091	0.160651	0.751922	0.77443	0.627396	8	12	2	10	10	8
NONRATT013910.2	NONRATT013910.2	PMID24510058	fufaw.aSep08-unspliced	-	18:68956110-68956956	847	0.589177	0.279527	0.445347	0.469023	0.751378	0.326105	12	5	8	9	14	6
NONRATT014018.2	NONRATT014018.2	PMID24510058	pydar.aSep08	-	19:10127219-10128112	894	4.23315	4.29053	4.11359	5.52982	4.47464	4.22252	91	81	78	112	88	82
NONRATT000291.2	NONRATT000291.2	-	-	-	1:65523343-65530438	578	0.935322	0.573466	0.734146	0.534579	1.57298	0.955748	13	7	9	7	20	12
NONRATT009234.2	NONRATT009234.2	PMID24510058	Hnrpd.gSep08	-	14:11271844-11274978	2044	4.45577	4.61034	6.41255	2.69935	4.359	4.68469	219	199	278	125	196	208
NONRATT001333.2	NONRATT001333.2	-	-	-	1:213545646-213546035	390	20.6869	16.7562	11.2431	15.7319	10.9565	8.8531	194	138	93	139	94	75
NONRATT022368.2	NONRATT022368.2	PMID24510058	Asah3l.bSep08	-	5:105230643-105253184	380	0.109428	0	0.372183	0.348515	0	0	1	0	3	3	0	0
MSTRG.10065.3	-	-	-	-	18:28561638-28582171	1619	5.7282	6.4641	3.29078	3.78965	5.81213	3.98087	223	221	113	139	207	140
NONRATT023896.2	NONRATT023896.2	PMID24510058	klowee.aSep08-unspliced	-	5:168697044-168697564	521	0.23944	0	0	0	0.436223	0.0884041	3	0	0	0	5	1
MSTRG.10065.4	-	-	-	-	18:28565785-28582172	5035	1.91624	2.33246	2.90288	2.84915	2.09459	3.06297	232	248	310	325	232	335
NONRATT023797.2	NONRATT023797.2	PMID24510058	fleewaw.aSep08-unspliced	-	5:160175206-160176088	883	3.29685	6.38188	2.99017	1.3497	4.4274	2.13756	70	119	56	27	86	41
NONRATT006172.2	NONRATT006172.2	PMID24510058	Icam2.bSep08	-	10:94570928-94575251	1340	0.434507	0.247361	0	0	0	0.755802	14	7	0	0	0	22
NONRATT028384.2	NONRATT028384.2	PMID24510058	snorpey.aSep08	-	8:32142284-32166205	669	0.310843	0.21234	0.352365	0.197961	0.407718	0.275248	5	3	5	3	6	4
ENSRNOT00000086092	NONRATT031550.1	ensembl	-	AABR07004364.1	1:139196994-139199494	1009	0	0.0469295	0.186922	0.174976	0.0450398	0.0912492	0	1	4	4	1	2
NONRATT000638.2	NONRATT000638.2	PMID24510058	KRAB.68.aSep08	-	1:99483266-99494167	924	0.630129	0.46127	0.0510036	0.955412	0.245966	0.29893	14	9	1	20	5	6
NONRATT009957.2	NONRATT009957.2	PMID24510058	LRRNT.1.aSep08	-	14:67169663-67170032	370	0.562038	0.895846	1.01948	0.477165	0.368599	0.124482	5	7	8	4	3	1
NONRATT013966.2	NONRATT013966.2	PMID24510058	snydoy.aSep08	-	18:79510995-79512211	285	0.437713	0.664588	0.496244	0.619478	0.797446	0.484663	3	4	3	4	5	3
NONRATT021837.2	NONRATT021837.2	PMID24510058	Usp5.dSep08-unspliced	-	4:157342993-157343463	471	1.1478	1.30705	1.00098	0.749687	0.868673	0.684225	13	13	10	8	9	7
NONRATT014894.2	NONRATT014894.2	PMID24510058	LOC685655.aSep08-unspliced	-	2:12519767-12541273	702	0.710874	0.539622	0.403001	0.565901	0.906577	0.918081	12	8	6	9	14	14
NONRATT008516.2	NONRATT008516.2	PMID24510058	Lin9.aSep08	-	13:98931486-98940437	348	0.238981	0.408206	0.270984	0.253665	0.13059	0.26457	2	3	2	2	1	2
NONRATT019186.2	NONRATT019186.2	PMID24510058	Slc25a25.cSep08	-	3:11445586-11449427	714	6.64	8.82097	4.09409	7.85118	2.67402	4.57783	114	133	62	127	42	71
NONRATT000376.2	NONRATT000376.2	PMID24510058	Kptn.gSep08	-	1:78016046-78019648	414	0.502304	0.686259	0.455567	0.106667	1.20782	1.22321	5	6	4	1	11	11
NONRATT030613.2	NONRATT030613.2	PMID24510058	ruby.aSep08	-	X:74337700-74347423	2543	0.605082	0.744856	1.16805	0.954656	0.339634	0.199139	37	40	63	55	19	11
ENSRNOT00000083606	NONRATT032252.1	ensembl	-	AABR07026281.1	16:70483075-70487794	2065	0.0402739	0	0.0913339	0.128245	0.110059	0.0891723	2	0	4	6	5	4
NONRATT006971.2	NONRATT006971.2	PMID24510058	neymu.aSep08-unspliced	-	11:61994178-61996918	2741	42.4824	51.069	37.4813	46.3783	49.5378	52.771	2800	2956	2179	2880	2987	3142
NONRATT018469.2	NONRATT018469.2	PMID24510058	Eif2ak4.cSep08	-	3:110243818-110245380	740	0.224772	0.319945	0.382307	0.298258	0.307124	0.4355	4	5	6	5	5	7
NONRATT009081.2	NONRATT009081.2	PMID24510058	Capn2.fSep08	-	13:100885317-100890451	521	1.03765	1.63605	1.44793	1.60967	1.74507	1.23703	13	18	16	19	20	14
NONRATT029213.2	NONRATT029213.2	PMID24510058	RGD1310693.dSep08	-	9:17231862-17237981	314	0	0.150802	0.600652	0.42177	0.14473	0.146683	0	1	4	3	1	1
NONRATT021694.2	NONRATT021694.2	PMID24510058	lerzer.aSep08-unspliced	-	4:144634795-144636302	1508	0	0	0.625315	0	0	0	0	0	20	0	0	0
NONRATT030578.2	NONRATT030578.2	PMID24510058	noyby.aSep08	-	X:71174857-71175959	390	0.533215	1.09286	0.241801	0.226348	0.116526	0.236078	5	9	2	2	1	2
NONRATT018238.2	NONRATT018238.2	PMID24510058	RGD1565551.bSep08	-	3:57654422-57656435	421	0.395086	0.674849	0.447992	0.524255	0.647894	0.656084	4	6	4	5	6	6
NONRATT029454.2	NONRATT029454.2	PMID24510058	leepar.aSep08-unspliced	-	9:69611127-69612091	965	0.861902	0.245346	0.830617	0.137239	0.753687	0.286229	20	5	17	3	16	6
NONRATT009947.2	NONRATT009947.2	PMID24510058	RGD1311045.dSep08	-	14:66749801-66765729	1102	0.22644	0.0859381	0.256721	0.360492	0.659989	0.250645	6	2	6	9	16	6
NONRATT006965.2	NONRATT006965.2	PMID24510058	RGD1565858.aSep08	-	11:54204758-54251650	395	0	0	0.11931	0.223483	0.115051	0.116604	0	0	1	2	1	1
NONRATT000488.2	NONRATT000488.2	PMID24510058	styfly.aSep08	-	1:82209361-82209852	408	1.1212	0.928468	1.84895	2.59645	2.45115	1.35398	11	8	16	24	22	12
NONRATT006639.2	NONRATT006639.2	PMID24510058	kyloy.aSep08	-	11:71489142-71491431	374	0.222368	0	0.378154	0.236031	0.243146	0.123151	2	0	3	2	2	1
NONRATT008564.2	NONRATT008564.2	PMID24510058	smulu.aSep08-unspliced	-	13:108681700-108682480	781	0.958476	1.21266	1.75072	1.58246	1.33869	1.23785	18	20	29	28	23	21
NONRATT018160.2	NONRATT018160.2	PMID24510058	Pkp4.iSep08	-	3:45326874-45360675	522	3.98349	4.08233	5.69034	3.97431	3.83169	3.9686	50	45	63	47	44	45
NONRATT028890.2	NONRATT028890.2	PMID24510058	chorrer.aSep08-unspliced	-	8:104587233-104589557	2325	15.5438	17.3939	14.7022	14.2007	19.9038	15.682	869	854	725	748	1018	792
NONRATT014165.2	NONRATT014165.2	PMID24510058	dader.aSep08-unspliced	-	19:30795697-30796239	543	2.14445	1.65697	3.99412	3.65803	3.26495	3.39126	28	19	46	45	39	40
NONRATT029158.2	NONRATT029158.2	-	-	-	9:15121987-15124962	2217	0.33765	0.512626	0.340266	0.65702	0.615122	0.415293	18	24	16	33	30	20
NONRATT014179.2	NONRATT014179.2	PMID24510058	Lsm6.bSep08	-	19:32778231-32783707	449	0	0.105461	0	0.0983521	0	0.10258	0	1	0	1	0	1
NONRATT021825.2	NONRATT021825.2	PMID24510058	Clec4a1.bSep08	-	4:155947444-155949818	1008	0.206304	0.187904	0.233861	0.306535	0.0902148	0.182679	5	4	5	7	2	4
NONRATT027370.2	NONRATT027370.2	PMID24510058	glysa.aSep08	-	7:144720894-144722698	951	0.262394	0.0995833	0.297484	0.092824	0.286817	0.290443	6	2	6	2	6	6
NONRATT003832.2	NONRATT003832.2	PMID24510058	sloklar.aSep08-unspliced	-	1:264778117-264778720	604	0.206537	0.156794	0.234155	0.146152	0.301038	0.457303	3	2	3	2	4	6
NONRATT022067.2	NONRATT022067.2	PMID24510058	chorvo.bSep08	-	5:16843316-16847807	580	4.87577	5.307	3.98325	3.95734	4.31065	4.04796	68	65	49	52	55	51
MSTRG.22486.1	-	-	-	-	9:61992740-62056525	6863	3.14494	4.06409	6.6501	4.57928	4.5968	5.70168	519	589	968	712	694	850
NONRATT027424.2	NONRATT027424.2	-	-	-	8:12860858-12861372	515	0.80751	0.735563	1.19018	1.28561	2.2067	0.893888	10	8	13	15	25	10
NONRATT025658.2	NONRATT025658.2	PMID24510058	snersu.aSep08-unspliced	-	7:23812514-23814811	2298	0.21716	0.247289	0.164147	0.38416	0.276944	0.260436	12	12	8	20	14	13
NONRATT017693.2	NONRATT017693.2	PMID24510058	deydy.aSep08-unspliced	-	20:14418805-14419382	578	9.13767	12.1254	10.0333	11.0731	12.8982	13.2214	127	148	123	145	164	166
NONRATT001614.2	NONRATT001614.2	PMID24510058	boklu.aSep08-unspliced	-	1:241526193-241526883	691	0.601835	0.616807	0.61409	0.447159	0.394737	0.999351	10	9	9	7	6	15
NONRATT002249.2	NONRATT002249.2	PMID24510058	Zfp324.aSep08-unspliced	-	1:65605836-65606742	907	1.74234	1.61852	2.1833	2.43327	2.00476	2.58855	38	31	42	50	40	51
ENSRNOT00000077098	ENSRNOT00000077098	ensembl:lincRNA	-	LOC102549726	20:4871271-4872264	747	1.0021	1.83842	0.820537	1.29997	1.09537	0.616268	18	29	13	22	18	10
NONRATT021839.2	NONRATT021839.2	PMID24510058	Gnb3.eSep08	-	4:157355944-157358262	713	0	0.132824	0.132261	0	0	0.129131	0	2	2	0	0	2
NONRATT023165.2	NONRATT023165.2	PMID24510058	Ccl27.hSep08-unspliced	-	5:58159095-58159386	292	0.142407	0.162164	0.161395	0.151233	0.155634	0.157735	1	1	1	1	1	1
NONRATT019929.2	NONRATT019929.2	PMID24510058	lysho.aSep08-unspliced	-	3:160282921-160283370	450	0.0924061	0	0	0.0981335	0.100989	0	1	0	0	1	1	0
NONRATT004935.2	NONRATT004935.2	PMID24510058	Rap2ip.eSep08	-	10:90349253-90350144	393	1.37561	2.53037	0.719865	0.22462	0.925328	0.117197	13	21	6	2	8	1
NONRATT008679.2	NONRATT008679.2	PMID24510058	garkee.aSep08	-	13:47494867-47502070	735	0.11315	0.0644243	0.384907	0.300287	0.371107	0.125266	2	1	6	5	6	2
NONRATT006850.2	NONRATT006850.2	PMID24510058	pleema.aSep08-unspliced	-	11:30917491-30918155	665	0.375243	0.427235	0.141808	0.199151	0.205085	0.484616	6	6	2	3	3	7
NONRATT030346.2	NONRATT030346.2	PMID24510058	Gin1.eSep08	-	9:111211017-111213269	382	0.217711	0.247916	0.493729	0.577778	0.35702	0.843638	2	2	4	5	3	7
NONRATT013319.2	NONRATT013319.2	PMID24510058	shodoy.aSep08	-	18:28355634-28356304	671	0.681744	0.917468	0.0702344	0.920974	2.1679	1.78378	11	13	1	14	32	26
NONRATT004218.2	NONRATT004218.2	PMID24510058	Mgat4b.eSep08-unspliced	-	10:35735182-35735559	378	0.880165	1.00216	0.997908	2.33545	1.20262	1.33971	8	8	8	20	10	11
NONRATT011544.2	NONRATT011544.2	PMID24510058	Lonrf1.aSep08	-	16:59565236-59581113	444	0.374619	0.213297	0.318535	0.397638	0.204812	0.725833	4	2	3	4	2	7
NONRATT007704.2	NONRATT007704.2	PMID24510058	snulo.aSep08-unspliced	-	12:5520585-5522009	1425	0	0	0.0661771	0.0309895	0.0638151	0.0969326	0	0	2	1	2	3
NONRATT007039.2	NONRATT007039.2	PMID24510058	slermo.aSep08-unspliced	-	11:69099288-69099674	387	0.967145	1.22368	1.8275	1.48272	1.29208	1.30855	9	10	15	13	11	11
NONRATT021283.2	NONRATT021283.2	-	-	-	4:55709972-55710691	720	0.808665	0.526132	0.720332	0.674358	0.820795	0.959099	14	8	11	11	13	15
NONRATT021392.2	NONRATT021392.2	PMID24510058	smeyzu.aSep08-unspliced	-	4:77711129-77711611	483	0.0860927	0.196074	0	0.182765	0	0	1	2	0	2	0	0
ENSRNOT00000090014	NONRATT032826.1	ensembl	-	AABR07044551.1	20:10491934-10493306	422	0.295612	0.112208	0.782072	0.523012	0.215489	0.109143	3	1	7	5	2	1
NONRATT010444.2	NONRATT010444.2	PMID24510058	shorjo.aSep08-unspliced	-	15:34327253-34327623	371	0.448332	0.510532	0.381212	0.11903	0.367606	0.496337	4	4	3	1	3	4
NONRATT017843.2	NONRATT017843.2	PMID24510058	snerbor.aSep08	-	20:55569134-55571414	608	0.273571	0.389407	0.697922	0.798582	0.299057	0.90859	4	5	9	11	4	12
NONRATT016985.2	NONRATT016985.2	PMID24510058	Zranb2.eSep08	-	2:263870821-263876424	774	2.95516	2.20253	4.20312	1.48272	3.11277	2.55754	55	36	69	26	53	43
NONRATT030013.2	NONRATT030013.2	PMID24510058	supo.aSep08-unspliced	-	9:60981252-60982035	784	1.16697	1.14762	0.841924	0.506712	0.811757	0.763369	22	19	14	9	14	13
NONRATT015211.2	NONRATT015211.2	PMID24510058	Usp13.bSep08	-	2:119288982-119290926	354	0.117465	0.267525	0.133128	0.124746	0.128376	0.390195	1	2	1	1	1	3
NONRATT015106.2	NONRATT015106.2	PMID24510058	seebla.aSep08-unspliced	-	2:68636211-68636673	463	0.538956	1.02282	0.712817	1.04868	0.687276	0.596569	6	10	7	11	7	6
NONRATT003233.2	NONRATT003233.2	PMID24510058	Prss36.aSep08	-	1:199380427-199381441	599	2.98541	2.2136	1.33814	4.0529	2.95972	2.30568	43	28	17	55	39	30
NONRATT010463.2	NONRATT010463.2	PMID24510058	pleyjo.aSep08-unspliced	-	15:36909513-36910148	636	1.30776	0.967958	1.63094	1.52685	1.64389	1.52007	20	13	22	22	23	21
NONRATT002149.2	NONRATT002149.2	PMID24510058	Acat2.eSep08	-	1:47972764-47977406	510	0.16307	0.371387	0.277313	0.346179	0.178307	0.270841	2	4	3	4	2	3
NONRATT010493.2	NONRATT010493.2	PMID24510058	Cab39l.hSep08	-	15:39779483-39794692	412	0.80753	1.60916	1.71661	2.35698	1.32398	1.6761	8	14	15	22	12	15
NONRATT014443.2	NONRATT014443.2	PMID24510058	Ndrg4.hSep08-unspliced	-	19:9766439-9768724	2286	1.00057	1.11861	1.38187	2.25913	2.4658	1.83258	55	54	67	117	124	91
NONRATT006744.2	NONRATT006744.2	PMID24510058	puloy.aSep08	-	11:87072457-87074050	1421	2.31203	2.93258	0	2.70246	1.82344	2.39736	79	88	0	87	57	74
NONRATT004424.2	NONRATT004424.2	PMID24510058	Pik3r6.dSep08	-	10:55109357-55109849	323	0.257478	0.439801	0.145905	0.136718	0.140697	0.285048	2	3	1	1	1	2
NONRATT010848.2	NONRATT010848.2	PMID24510058	Slc7a7.fSep08	-	15:33017421-33057970	736	2.3167	4.31082	2.4343	2.75873	1.72939	3.31507	41	67	38	46	28	53
NONRATT007772.2	NONRATT007772.2	PMID24510058	terlaw.aSep08-unspliced	-	12:13805216-13805706	491	1.01636	1.06093	1.44041	1.70803	1.0184	0.750065	12	11	15	19	11	8
NONRATT006645.2	NONRATT006645.2	PMID24510058	Pigx.cSep08	-	11:71952751-71954220	847	0.687413	0.615015	1.5586	1.35493	1.07341	1.30442	14	11	28	26	20	24
NONRATT001840.2	NONRATT001840.2	PMID24510058	Slk.cSep08-unspliced	-	1:267387075-267387410	336	1.11394	1.26849	1.12265	0.919604	1.4882	0.822057	9	9	8	7	11	6
NONRATT011808.2	NONRATT011808.2	PMID24510058	Gcap14.dSep08	-	16:14113088-14115847	284	1.46432	1.66748	2.65623	1.86513	2.24091	1.78314	10	10	16	12	14	11
NONRATT030897.2	NONRATT030897.2	PMID24510058	Prickle3.cSep08-unspliced	-	X:15682653-15683492	840	1.38624	2.02948	1.17869	1.36622	1.8941	1.58934	28	36	21	26	35	29
NONRATT025355.2	NONRATT025355.2	PMID24510058	Eif5.dSep08	-	6:136003658-136005428	1232	4.21949	4.53559	9.1082	5.12337	5.1288	4.59614	125	118	238	143	139	123
NONRATT026462.2	NONRATT026462.2	PMID24510058	plorsy.aSep08-unspliced	-	7:11446127-11446495	369	0.11269	0	0.127716	0.119675	0	0	1	0	1	1	0	0
NONRATT030358.2	NONRATT030358.2	PMID24510058	Ralbp1.bSep08	-	9:113594880-113599736	577	2.52263	2.38007	0.0816764	1.68297	1.5757	1.1968	35	29	1	22	20	15
NONRATT018853.2	NONRATT018853.2	PMID24510058	Sfrs6.dSep08	-	3:159306486-159307618	688	14.6281	18.9281	17.6806	17.8997	15.3289	17.7319	242	275	258	279	232	265
NONRATT008960.2	NONRATT008960.2	PMID24510058	Ndufs2.cSep08	-	13:89611587-89619383	519	2.96478	2.91976	3.08872	3.82719	3.76628	3.10454	37	32	34	45	43	35
NONRATT004419.2	NONRATT004419.2	PMID24510058	shomee.aSep08	-	10:54468425-54469891	800	4.41862	2.90048	5.42208	4.46915	4.2617	5.23659	85	49	92	81	75	91
NONRATT023949.2	NONRATT023949.2	PMID24510058	neywer.aSep08-unspliced	-	5:173331581-173333258	1678	2.08183	2.20121	2.02306	1.9992	2.5736	1.28944	84	78	72	76	95	47
NONRATT016890.2	NONRATT016890.2	PMID24510058	zorbloy.aSep08-unspliced	-	2:238743115-238743396	282	0.589826	0.335829	2.00626	1.0957	0.967246	0.979473	4	2	12	7	6	6
NONRATT002036.2	NONRATT002036.2	PMID24510058	DUF1725.497.aSep08-unspliced	-	1:31535074-31537033	1960	3.54339	3.84151	4.23374	3.55821	4.1979	4.69757	167	159	176	158	181	200
NONRATT030322.2	NONRATT030322.2	PMID24510058	Transposase_22.4.aSep08-unspliced	-	9:101583397-102613788	5848	0.760916	0.753071	1.27385	0.505709	1.15822	0.889551	107	93	158	67	149	113
NONRATT025370.2	NONRATT025370.2	PMID24510058	Wdr20a.dSep08	-	6:135214045-135218921	503	0.744105	1.31804	1.59353	1.31628	1.26524	1.00678	9	14	17	15	14	11
NONRATT005775.2	NONRATT005775.2	PMID24510058	lynar.aSep08-unspliced	-	10:67866932-67869199	2268	1.26523	1.4198	1.39284	6.01377	5.89271	5.2978	69	68	67	309	294	261
NONRATT014656.2	NONRATT014656.2	PMID24510058	Ctf8.eSep08	-	19:39074446-39081282	479	1.30234	1.28522	2.75603	1.47442	1.89808	2.21051	15	13	28	16	20	23
NONRATT026847.2	NONRATT026847.2	PMID24510058	Gpr182.cSep08	-	7:71046579-71048372	409	3.76216	1.38941	0.230568	1.72677	1.88948	0.900444	37	12	2	16	17	8
NONRATT008251.2	NONRATT008251.2	PMID24510058	Tnnt2.aSep08	-	13:52663050-52680902	1027	0.0404895	0	0.0458883	0.0429991	0	0	1	0	1	1	0	0
NONRATT027706.2	NONRATT027706.2	PMID24510058	Idh3a.eSep08-unspliced	-	8:59182409-59183902	1494	1.69801	0.697315	0.946746	0.915889	1.43007	1.04769	61	22	30	31	47	34
NONRATT004147.2	NONRATT004147.2	PMID24510058	Stk10.aSep08	-	10:17510913-17520074	1196	1.5995	0.752285	0.591341	0.701204	1.29227	1.00077	46	19	15	19	34	26
NONRATT001082.2	NONRATT001082.2	-	-	-	1:174330932-174335830	494	0.168351	0.191708	0.190895	0.268088	0.460065	0.186377	2	2	2	3	5	2
NONRATT020804.2	NONRATT020804.2	PMID24510058	Atg7.eSep08-unspliced	-	4:146777105-146777750	646	0.38628	0.366501	0.510889	0.409949	0.633352	0.142524	6	5	7	6	9	2
NONRATT016054.2	NONRATT016054.2	PMID24510058	goyshor.aSep08-unspliced	-	2:33110391-33110768	378	1.10018	0.501078	1.62154	0.350359	0.962047	1.33971	10	4	13	3	8	11
NONRATT026131.2	NONRATT026131.2	PMID24510058	bysoy.aSep08-unspliced	-	7:121912268-121912935	668	0.186749	0.070886	0.282342	0.132149	0.0680317	0.13783	3	1	4	2	1	2
NONRATT005761.2	NONRATT005761.2	PMID24510058	ploymee.aSep08	-	10:65478540-65481484	427	0.0973835	0	0.110368	0.206734	0.106429	0.215622	1	0	1	2	1	2
NONRATT016646.2	NONRATT016646.2	PMID24510058	kawbler.aSep08-unspliced	-	2:195909691-195910465	775	0.268328	0.427694	0.547531	0.284789	0.351953	1.0692	5	7	9	5	6	18
NONRATT011111.2	NONRATT011111.2	-	-	-	15:60722134-60733292	3917	0.445922	0.157166	0.505553	0.236639	0.533847	0.658161	42	13	42	21	46	56
NONRATT020080.2	NONRATT020080.2	PMID24510058	FFD_TFG.0.aSep08	-	3:175416315-175418528	734	25.6662	24.3225	22.9319	34.5181	26.9404	29.1645	453	377	357	574	435	465
NONRATT001248.2	NONRATT001248.2	PMID24510058	Fus.dSep08	-	1:199424724-199426705	807	6.59623	5.51587	9.87372	8.86082	8.33678	8.21463	128	94	169	162	148	144
NONRATT011756.2	NONRATT011756.2	PMID24510058	zogaw.aSep08-unspliced	-	16:7511492-7512230	739	1.85709	2.88359	1.33979	3.22541	2.82961	2.67867	33	45	21	54	46	43
NONRATT014577.2	NONRATT014577.2	PMID24510058	Gcdh.cSep08-unspliced	-	19:26005958-26006995	1038	15.6252	20.6207	27.7984	34.3168	23.4735	24.9251	390	452	612	807	536	562
NONRATT005255.2	NONRATT005255.2	PMID24510058	Traf7.fSep08	-	10:13875348-13877385	1103	1.1688	1.50264	1.49608	1.20052	1.89581	0.959958	31	35	35	30	46	23
NONRATT002147.2	NONRATT002147.2	PMID24510058	Thiolase_C.1.aSep08	-	1:48025030-48025753	405	0.30802	2.92307	0.582054	0.544966	0.224535	0.682003	3	25	5	5	2	6
NONRATT013017.2	NONRATT013017.2	PMID24510058	C1-set.0.aSep08-unspliced	-	17:47875003-47876362	1360	0.0305756	0.0696351	0.0346524	0.0649085	0.0334156	0.169264	1	2	1	2	1	5
NONRATT003006.2	NONRATT003006.2	PMID24510058	shuflu.aSep08	-	1:167245679-167248534	1019	0.816227	0.418266	1.24927	0.823003	0.53531	0.72283	20	9	27	19	12	16
NONRATT016066.2	NONRATT016066.2	PMID24510058	Nln.eSep08	-	2:34086967-34089008	2042	0.325859	0.371046	0.115442	0.345862	0.244875	0.27053	16	16	5	16	11	12
NONRATT024192.2	NONRATT024192.2	PMID24510058	Sh3yl1.dSep08	-	6:49874908-49904799	609	0.136561	0.155507	0.0773847	0.0725124	0.223944	0.0756298	2	2	1	1	3	1
NONRATT005870.2	NONRATT005870.2	PMID24510058	Stxbp4.aSep08	-	10:78009333-78168609	2129	0.52741	0.355884	0.996563	0.725641	0.661915	0.735201	27	16	45	35	31	34
NONRATT025524.2	NONRATT025524.2	PMID24510058	Mrpl54.aSep08-unspliced	-	7:11322178-11322925	748	0.222368	0.189914	0.252145	0.236031	0.243084	0.246178	4	3	4	4	4	4
NONRATT020429.2	NONRATT020429.2	PMID24510058	Zfp282.bSep08	-	4:77556849-77567732	732	0.113614	0.258753	0.257657	0.180923	0.186314	0.251559	2	4	4	3	3	4
NONRATT005249.2	NONRATT005249.2	-	-	-	10:13571213-13576729	761	0.327906	0.497786	0.557604	0.522027	0.418145	0.423482	6	8	9	9	7	7
NONRATT025619.2	NONRATT025619.2	PMID24510058	LOC299558.aSep08-unspliced	-	7:15293193-15293645	453	0.183588	0.10453	0.104034	0	0.200743	0.203246	2	1	1	0	2	2
NONRATT028125.2	NONRATT028125.2	-	-	-	8:123284950-123290643	994	0.376544	0.571699	0.284615	0.133235	0.320129	0.277879	9	12	6	3	7	6
NONRATT006311.2	NONRATT006311.2	PMID24510058	Sfrs2.bSep08-unspliced	-	10:105793236-105795111	1876	22.2567	27.7413	31.3401	25.8581	25.3703	22.8462	1004	1099	1247	1099	1047	931
NONRATT007217.2	NONRATT007217.2	PMID24510058	DUF2346.0.cSep08	-	12:2171428-2172166	739	0.225076	0.833046	1.14841	0.477811	0.799692	0.809853	4	13	18	8	13	13
NONRATT017552.2	NONRATT017552.2	-	-	-	20:4676851-4677801	951	0.0437253	0.0497917	0.0495555	0.0464354	0.0477868	0.0968143	1	1	1	1	1	2
MSTRG.5143.1	-	-	-	-	11:79710578-79732057	21157	1.83985	1.98085	3.21127	2.42845	2.27752	2.68727	936	885	1441	1164	1060	1235
NONRATT002642.2	NONRATT002642.2	PMID24510058	Ftl1.dSep08-unspliced	-	1:101449124-101450028	905	717	70.7964	59.4955	27.1667	38.2249	59.0075	15603	1353	1142	557	761	1160
NONRATT026306.2	NONRATT026306.2	PMID24510058	Slc4a8.dSep08	-	7:142459193-142462957	487	0.0853855	0.194464	0.0967706	0.0906778	0.0933166	0	1	2	1	1	1	0
ENSRNOT00000077509	NONRATT032343.1	ensembl	-	AABR07027371.1	17:26843010-26849469	2678	0.0310551	0.0530454	0.0880254	0.0329633	0.0339569	0.0171989	2	3	5	2	2	1
NONRATT031145.2	NONRATT031145.2	PMID24510058	Armcx2.bSep08-unspliced	-	X:105620245-105621004	760	0.218857	0.0623051	0.186092	0.29041	0.239246	0.242291	4	1	3	5	4	4
NONRATT025457.2	NONRATT025457.2	PMID24510058	Cnpy2.cSep08-unspliced	-	7:2741722-2742474	753	0.773226	0.943326	1.06447	1.23096	0.96588	1.16161	14	15	17	21	16	19
NONRATT005806.2	NONRATT005806.2	PMID24510058	Usp32.cSep08	-	10:72393345-72417070	363	3.32237	1.95682	1.42876	1.70241	1.62802	1.26819	29	15	11	14	13	10
NONRATT005520.2	NONRATT005520.2	PMID24510058	blarny.aSep08-unspliced	-	10:48772921-48773240	320	1.03969	0.295949	0.294695	0.413861	0.568209	0.431653	8	2	2	3	4	3
NONRATT009707.2	NONRATT009707.2	PMID24510058	Lrrc8c.cSep08	-	14:5327417-5350016	396	0.420028	0.597877	0.714411	0.557352	0.688797	0.465002	4	5	6	5	6	4
NONRATT025552.2	NONRATT025552.2	PMID24510058	moysy.aSep08-unspliced	-	7:11929470-11929923	454	0.54964	0.521496	0.623143	0.875027	0.801	0.709845	6	5	6	9	8	7
NONRATT014773.2	NONRATT014773.2	PMID24510058	Cotl1.cSep08	-	19:52466128-52488471	341	5.60999	4.30499	2.90353	2.97723	3.46598	1.75508	46	31	21	23	26	13
NONRATT019822.2	NONRATT019822.2	PMID24510058	Tm9sf4.cSep08-unspliced	-	3:148636018-148636459	442	1.12903	1.07142	2.34678	2.09709	0.925668	1.77064	12	10	22	21	9	17
NONRATT015433.2	NONRATT015433.2	PMID24510058	soyblee.aSep08-unspliced	-	2:188262451-188263042	592	0.983512	1.27986	1.91145	1.56574	2.22682	2.25514	14	16	24	21	29	29
NONRATT013245.2	NONRATT013245.2	PMID24510058	efhand_1.0.bSep08-unspliced	-	18:14580669-14581015	347	0.23967	0.136461	0.543529	0.508793	0.130966	0.132733	2	1	4	4	1	1
NONRATT001904.2	NONRATT001904.2	PMID24510058	Atrnl1.aSep08	-	1:278701730-279098708	2786	25.1076	24.3572	45.1514	43.8388	37.6587	47.1101	1682	1433	2668	2767	2308	2851
NONRATT027733.2	NONRATT027733.2	PMID24510058	Gramd1b.cSep08	-	8:44182669-44188531	399	2.81417	5.45946	2.36335	2.65502	5.46859	2.19221	27	46	20	24	48	19
NONRATT002555.2	NONRATT002555.2	PMID24510058	klogla.aSep08-unspliced	-	1:92002927-92004691	1765	4.05269	3.99765	4.78162	6.97734	20.3209	0.782495	172	149	179	279	789	30
NONRATT005067.2	NONRATT005067.2	PMID24510058	Grb2.dSep08	-	10:104201939-104253422	308	1.75525	0.768699	1.22471	0.286609	0.590347	1.79358	13	5	8	2	4	12
NONRATT026759.2	NONRATT026759.2	PMID24510058	spoyroy.aSep08	-	7:59766842-59783263	717	0.46402	0.330208	1.64394	2.09313	2.28241	2.69669	8	5	25	34	36	42
NONRATT026198.2	NONRATT026198.2	PMID24510058	spawsoy.aSep08-unspliced	-	7:126685426-126687282	1857	22.7979	23.69	19.4484	22.367	19.6814	26.9721	1018	929	766	941	804	1088
NONRATT013251.2	NONRATT013251.2	PMID24510058	skufa.aSep08-unspliced	-	18:15907728-15909240	1387	0.239872	0.477991	0.13598	0.286418	0.393281	0.298731	8	14	4	9	12	9
NONRATT007653.2	NONRATT007653.2	PMID24510058	Ep400.dSep08	-	12:51977127-51978310	684	1.0944	1.38463	1.44752	1.4197	1.2627	1.548	18	20	21	22	19	23
NONRATT014316.2	NONRATT014316.2	PMID24510058	Cenpn.eSep08	-	19:49457742-49470479	639	1.62706	0.815207	2.06594	1.24339	0.924839	1.51293	25	11	28	18	13	21
NONRATT025546.2	NONRATT025546.2	-	-	-	7:11784313-11785058	644	0.710327	1.3971	2.34277	1.98768	1.34113	1.7156	11	19	32	29	19	24
NONRATT005475.2	NONRATT005475.2	PMID24510058	Arf1.fSep08-unspliced	-	10:45563441-45565140	1700	1.7858	2.11702	2.21874	2.44067	2.4066	2.3018	73	76	80	94	90	85
NONRATT010627.2	NONRATT010627.2	PMID24510058	nawjee.aSep08-unspliced	-	15:70883133-70883398	266	0.312652	0.178015	0.35452	0.166015	0.512713	0.173152	2	1	2	1	3	1
NONRATT004080.2	NONRATT004080.2	PMID24510058	LRRNT.2.aSep08-unspliced	-	10:13915019-13915422	404	3.29408	3.51646	2.10068	4.04249	4.61327	3.19056	32	30	18	37	41	28
NONRATT019814.2	NONRATT019814.2	PMID24510058	gleychy.aSep08	-	3:148532456-148536361	673	0.0617872	0.140719	0.0700257	0.0656168	0.0675263	0.136806	1	2	1	1	1	2
NONRATT004815.2	NONRATT004815.2	PMID24510058	bomer.dSep08	-	10:84882101-84903559	665	2.31387	1.9939	0.921716	1.79216	1.29878	1.38452	37	28	13	27	19	20
NONRATT022858.2	NONRATT022858.2	PMID24510058	mywee.aSep08-unspliced	-	5:165775058-165777052	1995	4.08577	4.74731	4.39578	5.55343	5.5142	5.63047	196	200	186	251	242	244
NONRATT017154.2	NONRATT017154.2	PMID24510058	Zbtb9.aSep08-unspliced	-	20:5568575-5569532	958	5.20924	5.93168	4.97078	0.967553	4.98234	7.16009	120	120	101	21	105	149
NONRATT016014.2	NONRATT016014.2	PMID24510058	Tnpo1.dSep08-unspliced	-	2:29059739-29061626	1888	0.506634	1.02835	1.27362	0.537731	1.08349	0.609589	23	41	51	23	45	25
NONRATT026517.2	NONRATT026517.2	-	-	-	7:12415681-12417319	706	2.17949	4.15864	2.47093	3.37617	3.67013	3.32552	37	62	37	54	57	51
NONRATT019185.2	NONRATT019185.2	PMID24510058	Lcn2.bSep08	-	3:11414187-11416605	711	3.21701	3.86294	0.198916	1.55206	4.02796	1.29494	55	58	3	25	63	20
NONRATT024531.2	NONRATT024531.2	PMID24510058	RGD1309492.dSep08	-	6:110968282-110985988	394	0.21108	0.360547	0.239346	0.22405	0.230803	0.350581	2	3	2	2	2	3
NONRATT012985.2	NONRATT012985.2	PMID24510058	jeefer.aSep08	-	17:53756913-53758307	786	0	0.120488	0	0.0561833	0.0578183	0	0	2	0	1	1	0
NONRATT020370.2	NONRATT020370.2	PMID24510058	gozu.aSep08-unspliced	-	4:66238600-66241527	2928	7.88282	8.60405	10.2895	10.2209	9.40833	10.2669	555	532	639	678	606	653
NONRATT014482.2	NONRATT014482.2	PMID24510058	keedar.aSep08	-	19:14389535-14392258	760	0.49248	1.12155	0.868511	0.813123	0.777595	0.484581	9	18	14	14	13	8
NONRATT029214.2	NONRATT029214.2	PMID24510058	RGD1310693.cSep08-unspliced	-	9:17237479-17237976	498	0.166999	0.190168	0.378724	0.620455	0.182603	0.369761	2	2	4	7	2	4
NONRATT008046.2	NONRATT008046.2	PMID24510058	Cit.eSep08	-	12:46413981-46432237	1182	0.175934	0.0400608	0.83765	0.448137	0.0384477	0.662117	5	1	21	12	1	17
NONRATT028341.2	NONRATT028341.2	-	-	-	8:22971559-22973313	682	0.426861	0	0	0.129436	0.0666352	0	7	0	0	2	1	0
NONRATT029377.2	NONRATT029377.2	PMID24510058	Gls.cSep08	-	9:54248632-54254993	392	5.94101	8.09378	6.85574	14.5257	7.07383	14.0926	56	67	57	129	61	120
NONRATT018549.2	NONRATT018549.2	PMID24510058	Dut-ps.dSep08	-	3:117516769-117524804	930	1.07323	2.18949	4.35996	3.32234	3.03052	3.06906	24	43	86	70	62	62
NONRATT017169.2	NONRATT017169.2	PMID24510058	Sfrs3.dSep08-unspliced	-	20:6294083-6294982	900	4.02011	2.5782	3.50996	4.07066	3.28308	4.75705	87	49	67	83	65	93
NONRATT012991.2	NONRATT012991.2	PMID24510058	kafer.bSep08	-	17:54604530-54608826	436	0.0953733	0.108605	0.10809	0.202467	0.104232	0.633512	1	1	1	2	1	6
NONRATT023585.2	NONRATT023585.2	PMID24510058	leewo.aSep08-unspliced	-	5:141159098-141159596	499	0.583406	1.3286	0.944817	1.23842	1.45753	2.21412	7	14	10	14	16	24
NONRATT019609.2	NONRATT019609.2	PMID24510058	Tmem87a.cSep08	-	3:112155496-112173768	543	0.0765797	0.174408	0.26046	1.13807	0.167471	0.254381	1	2	3	14	2	3
NONRATT021320.2	NONRATT021320.2	PMID24510058	bleezy.aSep08-unspliced	-	4:61708932-61709500	569	0.146161	0.249658	0.662934	0.543035	0.159818	0.323622	2	3	8	7	2	4
NONRATT028569.2	NONRATT028569.2	PMID24510058	Atm.cSep08	-	8:58110943-58117132	480	0.0866307	0.295949	0.196463	0.275908	0.189451	0.479582	1	3	2	3	2	5
NONRATT003037.2	NONRATT003037.2	PMID24510058	Arfip2.gSep08-unspliced	-	1:170468871-170469510	640	4.09374	4.73548	4.56747	3.72434	3.76451	3.52461	63	64	62	54	53	49
NONRATT017500.2	NONRATT017500.2	PMID24510058	farboy.aSep08-unspliced	-	20:2488942-2489714	773	1.18357	1.34772	1.21989	0.970718	0.94089	1.07197	22	22	20	17	16	18
NONRATT018740.2	NONRATT018740.2	PMID24510058	LOC502684.eSep08	-	3:147866015-147895553	475	0.350171	0.299064	0.595593	0.55753	0.765587	0.969162	4	3	6	6	8	10
NONRATT025398.2	NONRATT025398.2	PMID24510058	V-set.27.aSep08	-	6:140110113-140110550	354	0	0	0.133128	0.249366	0.128376	0	0	0	1	2	1	0
NONRATT019020.2	NONRATT019020.2	PMID24510058	snycha.aSep08	-	3:2158110-2158720	408	0.203837	0	0.115508	0.108235	0.111385	0.338551	2	0	1	1	1	3
NONRATT013504.2	NONRATT013504.2	PMID24510058	koyfar.aSep08-unspliced	-	18:58300434-58300982	549	0.151485	0.172502	0.0858421	0.0804373	0.248418	0.0838953	2	2	1	1	3	1
NONRATT007550.2	NONRATT007550.2	PMID24510058	Mapkapk5.hSep08	-	12:40527761-40529332	412	0.403716	1.14943	0.686667	0.642783	0.441327	0.223472	4	10	6	6	4	2
NONRATT015387.2	NONRATT015387.2	PMID24510058	boyblee.aSep08-unspliced	-	2:186631423-186631865	443	0.0938663	0.106889	0.106382	0.0996841	0.102585	0.10397	1	1	1	1	1	1
NONRATT015072.2	NONRATT015072.2	PMID24510058	Lifr.bSep08	-	2:56426549-56456188	449	3.61222	5.37881	9.66073	5.50523	7.08705	6.35686	39	51	92	56	70	62
NONRATT005366.2	NONRATT005366.2	-	-	-	10:29357389-29367841	511	5.85965	6.20893	6.73546	2.67777	4.53689	2.61261	72	67	73	31	51	29
NONRATT005069.2	NONRATT005069.2	-	-	-	10:104160494-104163749	908	2.51905	2.65979	2.95975	2.43059	3.55455	2.63643	55	51	57	50	71	52
NONRATT024138.2	NONRATT024138.2	PMID24510058	Laptm4a.bSep08	-	6:34055765-34057681	511	0.244126	0.277995	0.461315	0.604671	0.44476	0.540531	3	3	5	7	5	6
NONRATT028737.2	NONRATT028737.2	PMID24510058	roypor.aSep08	-	8:77234421-77238652	2321	0.179176	2.16268	0.16252	0.646607	0.01958	0.0793369	10	106	8	34	1	4
NONRATT015004.2	NONRATT015004.2	PMID24510058	sparshaw.aSep08	-	2:41211082-41214103	797	1.61755	1.90132	2.07048	2.603	1.82517	2.19496	31	32	35	47	32	38
NONRATT004948.2	NONRATT004948.2	PMID24510058	Acbd4.gSep08	-	10:91187590-91188984	517	0.321723	0.457948	0.364806	0.256162	0.439598	0.267174	4	5	4	3	5	3
NONRATT002860.2	NONRATT002860.2	PMID24510058	Zfand6andFah.iSep08	-	1:146748662-146812587	746	2.95459	2.09478	0.379232	0.0591958	2.3765	0.123419	53	33	6	1	39	2
NONRATT023686.2	NONRATT023686.2	PMID24510058	moywar.aSep08-unspliced	-	5:151829794-151831374	1581	4.41914	3.89378	2.77343	3.32235	4.39918	4.33862	168	130	93	119	153	149
NONRATT019176.2	NONRATT019176.2	PMID24510058	Dnm1.cSep08	-	3:11338084-11344709	1127	0.479695	0.252095	0.209168	0.156656	0.201661	0.204259	13	6	5	4	5	5
NONRATT015996.2	NONRATT015996.2	PMID24510058	wushey.aSep08-unspliced	-	2:26500019-26501747	1729	0.192425	0.136934	0.0545415	0	0	0	8	5	2	0	0	0
NONRATT014519.2	NONRATT014519.2	PMID24510058	Tmem188.cSep08	-	19:19899577-19913572	755	0.936407	0.439024	0	0.760018	1.08377	1.89022	17	7	0	13	18	31
NONRATT015397.2	NONRATT015397.2	-	-	-	2:187281921-187282320	400	1.4556	2.60447	2.47526	1.76562	2.95475	2.53194	14	22	21	16	26	22
NONRATT002870.2	NONRATT002870.2	PMID24510058	Cetn2.dSep08	-	X:152928861-152932819	493	1.94021	3.07374	3.06033	5.90918	3.59609	2.708	23	32	32	66	39	29
NONRATT022740.2	NONRATT022740.2	PMID24510058	skoywar.aSep08-unspliced	-	5:154104043-154104725	683	0.0608825	0.207988	0.414212	0.064656	0.266218	0.0674356	1	3	6	1	4	1
NONRATT024410.2	NONRATT024410.2	PMID24510058	klortu.bSep08-unspliced	-	6:98884505-98884875	371	5.4926	5.8715	4.57506	5.71079	6.73902	5.83202	49	46	36	48	55	47
NONRATT021124.2	NONRATT021124.2	PMID24510058	PHD.5.bSep08	-	4:8239352-8255530	433	0.960434	0.984327	0.653365	1.22332	1.88971	1.48844	10	9	6	12	18	14
NONRATT012644.2	NONRATT012644.2	PMID24510058	zawgo.aSep08-unspliced	-	17:82019285-82020592	1308	0.445137	0.579264	0.648833	1.07986	0.799324	0.703902	14	16	18	32	23	20
MSTRG.1254.6	-	-	-	-	1:131490116-131496712	3781	3.50868	4.3209	7.63152	6.75931	5.20586	6.7453	319	345	612	579	433	554
ENSRNOT00000086870	NONRATT031803.1	ensembl	-	AC126572.4	12:13210874-13212407	491	1.01636	0.868052	0.576185	0.539362	0.185207	0.656354	12	9	6	6	2	7
NONRATT023883.2	NONRATT023883.2	PMID24510058	LOC691107.bSep08	-	5:167591053-167615006	758	0.274346	0.124939	0	0.291176	0.179923	0.24293	5	2	0	5	3	4
NONRATT028684.2	NONRATT028684.2	-	-	-	8:69139728-69141772	374	0.222368	0.126609	0.252145	0.472062	0.121511	0.246178	2	1	2	4	1	2
NONRATT006099.2	NONRATT006099.2	PMID24510058	gyner.aSep08-unspliced	-	10:90459951-90460975	1025	3.40811	3.97317	5.61181	5.5121	5.85412	7.00647	84	86	122	128	132	156
NONRATT015790.2	NONRATT015790.2	PMID24510058	Ube2d3.dSep08	-	2:240626381-240654728	1152	19.2413	18.4979	20.3	19.5794	18.0333	48.9532	533	450	496	511	457	1225
NONRATT011543.2	NONRATT011543.2	PMID24510058	Dlc1.eSep08-unspliced	-	16:59243897-59244581	685	0.485697	0.760463	0.825936	0.773282	0.796322	0.604876	8	11	12	12	12	9
NONRATT018347.2	NONRATT018347.2	PMID24510058	C1qtnf4.bSep08	-	3:79713641-79715959	667	0.374118	0.0709923	0.353421	0.264694	0.20447	0.0690533	6	1	5	4	3	1
NONRATT009412.2	NONRATT009412.2	PMID24510058	wawku.aSep08-unspliced	-	14:69874225-69874935	711	3.80191	3.92954	3.91245	4.22152	3.51642	4.59714	65	59	59	68	55	71
NONRATT029830.2	NONRATT029830.2	PMID24510058	klapa.aSep08-unspliced	-	9:17942486-17943395	910	4.7528	4.73544	5.44018	7.37281	5.09528	5.16009	104	91	105	152	102	102
NONRATT020472.2	NONRATT020472.2	-	-	-	4:82793863-82801540	407	1.12396	1.74527	1.39009	1.40986	1.45202	0.791818	11	15	12	13	13	7
NONRATT005230.2	NONRATT005230.2	PMID24510058	LOC680728.aSep08	-	10:12879893-12882116	542	0	0.0873651	0	0	0.0838472	0.25485	0	1	0	0	1	3
NONRATT007199.2	NONRATT007199.2	PMID24510058	peylo.aSep08	-	12:457509-458485	710	0.35146	0.800379	1.52733	0.808188	0.640268	1.23196	6	12	23	13	10	19
NONRATT028414.2	NONRATT028414.2	PMID24510058	Ei24.cSep08	-	8:39255849-39257559	542	0.920726	0.873737	0.869859	0.732957	1.50968	1.10421	12	10	10	9	18	13
NONRATT014868.2	NONRATT014868.2	PMID24510058	Glrx1.bSep08-unspliced	-	2:2606026-2606333	308	0.810184	1.22992	0.459187	1.57642	0.442798	1.19572	6	8	3	11	3	8
NONRATT018162.2	NONRATT018162.2	PMID24510058	Pkp4.gSep08	-	3:45407276-45411940	659	9.33974	10.635	10.0164	6.43006	9.24334	7.19529	148	148	140	96	134	103
NONRATT030177.2	NONRATT030177.2	PMID24510058	Slc23a3.bSep08	-	9:82328003-82331534	1347	1.72894	0.808567	1.64513	0.688134	0.303745	0.581011	56	23	47	21	9	17
NONRATT004970.2	NONRATT004970.2	PMID24510058	jermer.aSep08	-	10:93602107-93634076	663	0	0.142841	0.355553	0	0.0685448	0	0	2	5	0	1	0
NONRATT018330.2	NONRATT018330.2	-	-	-	3:72451720-72457135	1696	0.637543	0.279225	0.750595	0.494481	0.402042	0.760015	26	10	27	19	15	28
NONRATT020506.2	NONRATT020506.2	PMID24510058	RGD1564615.aSep08	-	4:87029610-87041178	887	0.843935	0.800817	0.691027	0.696701	0.461268	0.882325	18	15	13	14	9	17
NONRATT021261.2	NONRATT021261.2	PMID24510058	sharza.aSep08-unspliced	-	4:49387632-49388935	1304	0.0318886	0.0363128	0.289271	0.169257	0.139438	0.141212	1	1	8	5	4	4
NONRATT010016.2	NONRATT010016.2	PMID24510058	flawjey.aSep08	-	14:86802288-86803336	783	0.796707	0.483799	0.541937	0.22548	0.464437	0.17641	15	8	9	4	8	3
NONRATT029833.2	NONRATT029833.2	PMID24510058	plupa.aSep08-unspliced	-	9:18250916-18251628	713	0.641586	0.265649	0.396784	0.619043	0.637574	0.258262	11	4	6	10	10	4
NONRATT001100.2	NONRATT001100.2	PMID24510058	swawglee.aSep08-unspliced	-	1:175860304-175861036	733	2.2694	3.424	2.57292	3.97439	3.41088	3.26586	40	53	40	66	55	52
NONRATT028515.2	NONRATT028515.2	PMID24510058	Rexo2.bSep08	-	8:52806931-52813115	1854	1.21128	1.81347	1.34781	1.59514	2.03507	1.48984	54	71	53	67	83	60
NONRATT012211.2	NONRATT012211.2	-	-	-	17:5409534-5411195	1662	1.12601	0.911765	0.76595	1.27479	0.629071	0.415494	45	32	27	48	23	15
NONRATT009403.2	NONRATT009403.2	PMID24510058	LRR_1.2.cSep08	-	14:64686862-64695277	645	0.257878	0	0.511681	0	0.422889	0	4	0	7	0	6	0
NONRATT007790.2	NONRATT007790.2	PMID24510058	Lfng.aSep08	-	12:16117762-16119064	559	0.223163	0.169416	0.168698	0.315834	0.487949	0.411806	3	2	2	4	6	5
NONRATT018711.2	NONRATT018711.2	PMID24510058	jeeshu.aSep08-unspliced	-	3:146481411-146482173	763	0.381546	0.496481	0.18536	0.289268	0.297866	0.181034	7	8	3	5	5	3
NONRATT027465.2	NONRATT027465.2	PMID24510058	RGD1565419.dSep08	-	8:19875055-19905122	883	5.18073	5.20205	5.07259	4.39899	4.73631	3.85804	110	97	95	88	92	74
NONRATT027296.2	NONRATT027296.2	PMID24510058	Amigo2.bSep08	-	7:138706252-138707078	445	0	0	0.529735	1.19033	0.306476	1.4483	0	0	5	12	3	14
NONRATT027387.2	NONRATT027387.2	PMID24510058	lerpor.aSep08	-	8:881279-881816	538	0	0.0880146	0.175283	0.246163	0.253498	0.171135	0	1	2	3	3	2
NONRATT000181.2	NONRATT000181.2	PMID24510058	lafler.aSep08-unspliced	-	1:50016137-50016884	748	0.444789	1.07624	1.00852	0.649115	0.972336	1.53864	8	17	16	11	16	25
NONRATT029567.2	NONRATT029567.2	PMID24510058	tarnoy.aSep08	-	9:88091124-88096115	697	0.178979	0.0679367	0.0676145	0.126651	0.130468	0.0660811	3	1	1	2	2	1
NONRATT003003.2	NONRATT003003.2	PMID24510058	choyflu.bSep08	-	1:167214907-167215290	298	1.39553	1.11229	0.949352	1.18491	1.22031	1.23584	10	7	6	8	8	8
NONRATT026204.2	NONRATT026204.2	PMID24510058	spoysoy.aSep08-unspliced	-	7:126773323-126774476	1154	1.15321	1.02586	1.14397	0.917982	1.37872	1.23667	32	25	28	24	35	31
NONRATT001081.2	NONRATT001081.2	PMID24510058	RGD1306959.cSep08	-	1:174330576-174338677	1047	2.06547	0.0452262	0.720507	3.20406	1.43277	2.11054	52	1	16	76	33	48
NONRATT009189.2	NONRATT009189.2	PMID24510058	kajor.aSep08-unspliced	-	14:3680662-3682553	1892	0.219803	0.175192	0.0996853	0.233286	0.672746	0.218996	10	7	4	10	28	9
NONRATT026282.2	NONRATT026282.2	PMID24510058	chersa.bSep08	-	7:139255004-139256062	385	1.51231	0	0.122409	1.60513	0.472278	1.43486	14	0	1	14	4	12
NONRATT027319.2	NONRATT027319.2	PMID24510058	wawty.aSep08-unspliced	-	7:142029421-142031445	2025	8.99515	2.38527	1.93251	3.29143	1.66119	1.50043	438	102	83	151	74	66
NONRATT015153.2	NONRATT015153.2	PMID24510058	Impa1.eSep08	-	2:93693063-93696353	1929	2.13434	1.47291	3.153	4.32474	1.9795	3.29339	99	60	129	189	84	138
NONRATT012010.2	NONRATT012010.2	PMID24510058	choygar.aSep08	-	16:54102678-54107318	412	0.605672	0.804522	0.572165	0.857045	0.882655	1.22915	6	7	5	8	8	11
NONRATT000195.2	NONRATT000195.2	PMID24510058	steyflee.aSep08-unspliced	-	1:48088648-48089176	529	0	0.179024	0.0890875	0.0834784	0.171903	0.0870671	0	2	1	1	2	1
NONRATT022994.2	NONRATT022994.2	PMID24510058	RGD1307055.cSep08	-	5:8761302-8832473	912	0.911991	1.03847	1.8094	1.54874	1.04674	1.31241	20	20	35	32	21	26
ENSRNOT00000078523	NONRATT032399.1	ensembl	-	AC114093.1	18:74758959-74788939	1878	0	0	0	0.0705195	0.0241987	0	0	0	0	3	1	0
NONRATT002955.2	NONRATT002955.2	PMID24510058	keeglaw.aSep08-unspliced	-	1:164098467-164098855	389	1.06907	0.973817	1.33326	1.36169	0.818017	1.42011	10	8	11	12	7	12
NONRATT008931.2	NONRATT008931.2	PMID24510058	spoyla.aSep08-unspliced	-	13:86667770-86668347	578	1.94266	4.3422	9.78859	6.72025	4.79748	7.48686	27	53	120	88	61	94
NONRATT012479.2	NONRATT012479.2	PMID24510058	LOC502125.aSep08-unspliced	-	17:43632393-43632703	311	0	0	0	0	0	15.5427	0	0	0	0	0	105
NONRATT023477.2	NONRATT023477.2	PMID24510058	jowu.aSep08-unspliced	-	5:133707195-133707919	725	0.917799	0	1.10558	0.669708	0	0.761962	16	0	17	11	0	12
NONRATT008336.2	NONRATT008336.2	-	-	-	13:73255269-73269801	268	0.310319	0.176686	0.175848	0.164776	0.508887	0.515406	2	1	1	1	3	3
ENSRNOT00000084561	ENSRNOT00000084561	ensembl:lincRNA	-	AABR07024580.1	16:6689278-6690697	164	0.253553	0.288731	0.575014	0.807535	0.554491	1.12281	1	1	2	3	2	4
NONRATT001641.2	NONRATT001641.2	-	-	-	1:244775920-244779588	390	1.49292	4.24977	3.38497	2.94263	3.84643	4.01345	14	35	28	26	33	34
NONRATT006701.2	NONRATT006701.2	PMID24510058	feemaw.aSep08-unspliced	-	11:81797313-81797693	381	0.436564	0.497133	0.371206	0.579295	0.357957	0.483309	4	4	3	5	3	4
NONRATT007737.2	NONRATT007737.2	PMID24510058	Rpl21.eSep08	-	12:9998760-9999970	601	0.276757	2.75775	0	0.293762	0.151309	0	4	35	0	4	2	0
NONRATT021134.2	NONRATT021134.2	PMID24510058	shoywer.aSep08	-	4:10148828-10193421	283	0.146936	0.167321	0	0.156043	0.160584	0	1	1	0	1	1	0
NONRATT013727.2	NONRATT013727.2	PMID24510058	shorfy.aSep08-unspliced	-	18:27109815-27110445	631	0.0658998	0.225128	0.149449	0.0699843	0.0720209	0	1	3	2	1	1	0
ENSRNOT00000088476	NONRATT033032.1	ensembl	-	AABR07058985.1	4:84268-90986	1020	0	0	0.0462032	0.0432942	0	0.0451554	0	0	1	1	0	1
NONRATT022657.2	NONRATT022657.2	PMID24510058	sperwo.aSep08-unspliced	-	5:147495921-147496640	720	0	0.0657665	0	0	0.126301	0	0	1	0	0	2	0
ENSRNOT00000075924	NONRATT032808.1	ensembl	-	Snx3	20:47253664-47263390	932	49.2175	46.1859	65.6637	22.9698	47.0189	40.6026	1103	909	1298	485	964	822
NONRATT025945.2	NONRATT025945.2	PMID24510058	Eny2.cSep08	-	7:83348771-83356068	472	1.40976	3.21049	1.2986	0.935123	1.54091	2.14571	16	32	13	10	16	22
NONRATT024782.2	NONRATT024782.2	-	-	-	6:6696340-6709774	766	15.6359	0.185451	16.4957	0.172893	0.178044	0.120196	288	3	268	3	3	2
NONRATT018566.2	NONRATT018566.2	PMID24510058	zoychy.aSep08	-	3:119484821-119492993	675	0.431288	0.140302	0.419121	0.523115	0.404094	0.341036	7	2	6	8	6	5
NONRATT020970.2	NONRATT020970.2	PMID24510058	Bcl2l14.dSep08	-	4:168159651-168168315	394	2.00546	1.44231	1.6753	1.90448	2.8844	2.22003	19	12	14	17	25	19
NONRATT028613.2	NONRATT028613.2	PMID24510058	Commd4.fSep08	-	8:61834976-61836793	695	0.359046	0.681389	0.474869	0.571601	0.392465	0.264951	6	10	7	9	6	4
NONRATT001775.2	NONRATT001775.2	PMID24510058	Btrc.fSep08-unspliced	-	1:265250311-265250739	429	0.0969295	0.110377	0.439638	0.205771	0.529772	0.321979	1	1	4	2	5	3
NONRATT019595.2	NONRATT019595.2	PMID24510058	gorchoy.aSep08-unspliced	-	3:110548237-110551420	3184	0.365715	0.535415	1.65848	0.720871	0.271259	6.1738	28	36	112	52	19	427
NONRATT015250.2	NONRATT015250.2	PMID24510058	Plk4.bSep08	-	2:127696158-127698597	557	0.14931	0.170025	0.253913	0.158484	0.0815892	0.165297	2	2	3	2	1	2
NONRATT018352.2	NONRATT018352.2	PMID24510058	Psmc3.bSep08	-	3:79879812-79880665	748	2.33513	4.43157	3.3407	2.6555	3.0994	3.01571	42	70	53	45	51	49
NONRATT013737.2	NONRATT013737.2	PMID24510058	Cdc23.iSep08	-	18:27430926-27434546	539	0.308592	0	0	0	0	0	4	0	0	0	0	0
NONRATT017293.2	NONRATT017293.2	-	-	-	20:12970001-12972181	572	0.436253	0.413915	1.07158	0.617312	0.397329	0.402446	6	5	13	8	5	5
NONRATT001454.2	NONRATT001454.2	-	-	-	1:221112188-221114175	1365	0.670257	0.728525	0.690824	1.16414	0.69936	1.11296	22	21	20	36	21	33
NONRATT019476.2	NONRATT019476.2	PMID24510058	noychey.aSep08-unspliced	-	3:81339597-81340101	505	0.823501	0.562597	0.84027	0.699213	1.5303	1.18511	10	6	9	8	17	13
NONRATT001541.2	NONRATT001541.2	PMID24510058	snoykla.aSep08-unspliced	-	1:226109795-226110572	778	0.908724	1.15647	1.93926	2.09918	1.75286	1.53845	17	19	32	37	30	26
NONRATT016958.2	NONRATT016958.2	PMID24510058	smeyshee.aSep08	-	2:257544764-257546904	335	0.496511	0.282698	0.985177	1.05404	2.71397	2.06135	4	2	7	8	20	15
NONRATT016931.2	NONRATT016931.2	-	-	-	2:251529352-251530413	1062	1.33143	1.29312	1.50946	2.82627	1.58374	1.21373	34	29	34	68	37	28
NONRATT007654.2	NONRATT007654.2	-	-	-	12:52009205-52009473	269	1.08223	1.40823	1.92803	2.62546	1.85887	1.36908	7	8	11	16	11	8
NONRATT000853.2	NONRATT000853.2	PMID24510058	Hddc3.cSep08	-	1:142136482-142137742	810	4.6208	6.48931	8.67298	10.1903	10.1018	8.86621	90	111	149	187	180	156
NONRATT021103.2	NONRATT021103.2	PMID24510058	gawor.aSep08-unspliced	-	4:7209807-7210327	521	0.718397	0.545319	1.35747	1.69443	0.959761	0.530156	9	6	15	20	11	6
NONRATT021354.2	NONRATT021354.2	PMID24510058	Slc37a3.bSep08	-	4:67143535-67162784	393	1.48152	2.2894	2.15947	1.68471	0.925328	1.28858	14	19	18	15	8	11
NONRATT028300.2	NONRATT028300.2	PMID24510058	RGD1565847.cSep08-unspliced	-	8:21453489-21454330	842	2.2226	1.40599	3.07975	1.20574	3.02336	1.69491	45	25	55	23	56	31
NONRATT012467.2	NONRATT012467.2	PMID24510058	sheyga.aSep08-unspliced	-	17:42085027-42087483	2457	8.12448	7.45877	9.09577	8.53336	8.76968	9.55571	480	387	474	475	474	510
NONRATT010913.2	NONRATT010913.2	PMID24510058	Ripk3.cSep08	-	15:34473038-34474447	693	0.120008	0.273315	1.5648	0.828014	1.18073	0.0664625	2	4	23	13	18	1
NONRATT030729.2	NONRATT030729.2	PMID24510058	Accn2.dSep08	-	7:141325773-141327179	521	1.43679	1.2725	0.72401	1.60967	1.39598	0.61856	18	14	8	19	16	7
NONRATT021552.2	NONRATT021552.2	PMID24510058	Paip2b.aSep08	-	4:115488871-115516183	587	0.495945	0.32267	0.240936	0.225614	0.309756	0.235313	7	4	3	3	4	3
NONRATT028355.2	NONRATT028355.2	-	-	-	8:23292535-23303046	401	4.97799	6.14074	6.70187	6.82463	5.32799	6.08451	48	52	57	62	47	53
NONRATT017283.2	NONRATT017283.2	PMID24510058	smarda.aSep08-unspliced	-	20:12364382-12364893	512	9.90941	15.9082	7.64322	4.05193	5.85979	5.4848	122	172	83	47	66	61
NONRATT005831.2	NONRATT005831.2	PMID24510058	snoymee.aSep08	-	10:75353698-75354397	370	0.562038	1.02382	0.509742	0.357934	0.614249	0.497678	5	8	4	3	5	4
NONRATT025895.2	NONRATT025895.2	PMID24510058	Matn2.dSep08	-	7:73155088-73175031	278	0.299157	0.340661	0.50874	0.158849	0.163472	0.165678	2	2	3	1	1	1
NONRATT008998.2	NONRATT008998.2	PMID24510058	Ifi203.aSep08	-	13:92046119-92049717	507	0.902269	0.466981	0.929909	0.783555	1.25526	0.544795	11	5	10	9	14	6
NONRATT015855.2	NONRATT015855.2	PMID24510058	sarfla.aSep08-unspliced	-	2:251763186-251766013	2302	5.38357	4.13479	4.64929	7.45892	4.28513	5.53951	298	201	227	389	217	277
NONRATT000129.2	NONRATT000129.2	PMID24510058	glarfee.aSep08	-	1:33276401-33280061	394	4.11647	3.48553	3.94903	5.9376	5.99948	4.90743	39	29	33	53	52	42
NONRATT011247.2	NONRATT011247.2	-	-	-	16:2743849-3004663	831	1.40125	1.31064	1.30494	0.902966	1.36757	1.93894	28	23	23	17	25	35
NONRATT007062.2	NONRATT007062.2	-	-	-	11:70963223-70967130	449	1.01882	1.16017	1.1551	0.884772	0.809919	1.33292	11	11	11	9	8	13
NONRATT027807.2	NONRATT027807.2	PMID24510058	slorar.aSep08-unspliced	-	8:71127634-71128502	869	0	0	0.0542316	0	0.052296	0.10595	0	0	1	0	1	2
NONRATT011144.2	NONRATT011144.2	PMID24510058	fleejee.aSep08-unspliced	-	15:84317022-84319562	2541	4.51714	4.43542	5.43662	6.27095	6.13622	6.86645	276	238	293	361	343	379
NONRATT020314.2	NONRATT020314.2	PMID24510058	Ahcyl2.cSep08	-	4:57139804-57155908	536	0.620713	0.618401	1.93522	1.23524	1.8658	2.14721	8	7	22	15	22	25
NONRATT017916.2	NONRATT017916.2	PMID24510058	Egfl7.cSep08	-	3:4034929-4041802	675	0	0	0	0.653893	0	0	0	0	0	10	0	0
NONRATT008063.2	NONRATT008063.2	PMID24510058	Sppl3.bSep08-unspliced	-	12:47289850-47290589	740	1.85458	1.98379	2.61227	1.84911	1.72005	1.86636	33	31	41	31	28	30
ENSRNOT00000087486	NONRATT032931.1	ensembl	-	AABR07054680.1	3:166822620-166823554	708	0.117465	0.0668812	0.066564	0.124683	0.19263	0.0650544	2	1	1	2	3	1
NONRATT011675.2	NONRATT011675.2	PMID24510058	Col4a1.cSep08	-	16:83627504-83630835	720	3.81214	2.23619	2.61938	2.75877	2.1466	2.49361	66	34	40	45	34	39
ENSRNOT00000080451	ENSRNOT00000080451	ensembl:lincRNA	-	AABR07002845.1	1:86802994-86803614	184	0.451987	0.514694	0.512512	0	0.246985	0.250318	2	2	2	0	1	1
NONRATT018739.2	NONRATT018739.2	PMID24510058	sushu.aSep08-unspliced	-	3:147863989-147864763	775	0.0536552	0	0	0.113904	0.058639	0	1	0	0	2	1	0
NONRATT017348.2	NONRATT017348.2	PMID24510058	kleebor.aSep08	-	20:21972874-21975056	399	0.312652	0.237353	0.118114	0.221242	0.113898	0.230753	3	2	1	2	1	2
NONRATT022934.2	NONRATT022934.2	-	-	-	5:173256824-173257242	419	2.48136	2.8254	2.36301	1.68556	1.84439	2.74679	25	25	21	16	17	25
NONRATT020851.2	NONRATT020851.2	PMID24510058	Edem1.aSep08-unspliced	-	4:140915893-140918654	2762	0.782963	3.85763	4.21638	1.26251	2.73209	5.53366	52	225	247	79	166	332
NONRATT016970.2	NONRATT016970.2	PMID24510058	Rabggtb.jSep08	-	2:260110333-260113182	1340	5.49325	5.937	4.43337	4.51281	4.34227	4.157	177	168	126	137	128	121
NONRATT022024.2	NONRATT022024.2	PMID24510058	swovar.aSep08-unspliced	-	5:4880296-4881062	767	0.596415	0.432155	0.368849	0.517943	0.355624	0.420169	11	7	6	9	6	7
ENSRNOT00000083482	ENSRNOT00000083482	ensembl:lincRNA	-	AABR07046745.1	5:4548208-4549248	172	0.48352	0.550603	0.822265	0.51323	0.792917	0.535293	2	2	3	2	3	2
NONRATT022219.2	NONRATT022219.2	PMID24510058	sarvey.aSep08-unspliced	-	5:59069814-59070229	416	0.899724	1.36603	1.47342	0.954958	1.42061	1.8813	9	12	13	9	13	17
NONRATT030737.2	NONRATT030737.2	PMID24510058	Dip2b.bSep08-unspliced	-	7:141878162-141879601	1440	0.25992	0.394631	0.491141	0.888933	0.157828	0.383627	9	12	15	29	5	12
NONRATT022300.2	NONRATT022300.2	PMID24510058	lovor.aSep08-unspliced	-	5:76212601-76213799	1199	0.138725	0.0394928	0.0786508	0.0368308	0.0758436	0.0767893	4	1	2	1	2	2
NONRATT020254.2	NONRATT020254.2	PMID24510058	Mdfic.cSep08	-	4:42202838-42252768	760	0.383052	0	0	0	0	0.605726	7	0	0	0	0	10
NONRATT000235.2	NONRATT000235.2	-	-	-	1:56982769-56988132	785	0.476796	1.5684	1.08111	1.23704	1.67934	0.879683	9	26	18	22	29	15
NONRATT005288.2	NONRATT005288.2	PMID24510058	mermor.aSep08-unspliced	-	10:15163261-15163989	729	0.513423	0.779519	1.42288	1.87701	0.748259	1.07356	9	12	22	31	12	17
NONRATT028730.2	NONRATT028730.2	PMID24510058	RGD1560796.aSep08	-	8:78909112-78949169	2620	0.126986	0.108439	1.06174	0.050548	0.121454	0.140566	8	6	59	3	7	8
NONRATT011906.2	NONRATT011906.2	-	-	-	16:22617335-22618059	725	0.745677	1.63289	1.30066	1.40033	1.6302	1.96843	13	25	20	23	26	31
NONRATT030278.2	NONRATT030278.2	PMID24510058	VWA.1.cSep08-unspliced	-	9:97927384-97928377	994	0.334711	0.238188	0.189743	0.133235	0.182924	0.231589	8	5	4	3	4	5
NONRATT025232.2	NONRATT025232.2	PMID24510058	Rbm25.dSep08-unspliced	-	6:107160191-107161418	1228	1.86262	1.58104	2.76441	1.83317	1.81389	2.3618	55	41	72	51	49	63
NONRATT002603.2	NONRATT002603.2	PMID24510058	peygly.aSep08-unspliced	-	1:100834948-100835762	815	1.42876	1.85933	2.719	2.49132	2.1753	1.80757	28	32	47	46	39	32
NONRATT003072.2	NONRATT003072.2	PMID24510058	Copb1.cSep08	-	1:183728638-183729538	320	0.259892	0.739873	0.294695	0.413861	0.710225	0.143933	2	5	2	3	5	1
NONRATT021907.2	NONRATT021907.2	PMID24510058	Gpr19.cSep08	-	4:168661821-168666349	411	0.303524	0.576057	0.803003	0.429565	0.442401	0.448031	3	5	7	4	4	4
NONRATT028349.2	NONRATT028349.2	PMID24510058	Zfp653.cSep08	-	8:23067147-23067880	358	0.813183	0.925875	0.658469	0.369932	0.761909	0.51436	7	7	5	3	6	4
NONRATT020745.2	NONRATT020745.2	PMID24510058	slerzee.aSep08-unspliced	-	4:127176696-127177537	842	0.395133	0.449899	0.223996	0.209681	0.215946	0.273396	8	8	4	4	4	5
MSTRG.8246.4	-	-	-	-	15:59625069-59666854	6423	20.2271	33.5677	7.13501	8.95442	9.77387	9.94832	3124	4553	972	1303	1381	1388
MSTRG.8246.1	-	-	-	-	15:59581712-59651531	8229	9.27866	7.17023	4.51488	2.16167	3.32553	3.04893	1836	1246	788	403	602	545
NONRATT021773.2	NONRATT021773.2	PMID24510058	cheezey.aSep08-unspliced	-	4:150568017-150568483	467	0.267127	0.202792	0.302847	0.283588	0.292038	1.08439	3	2	3	3	3	11
NONRATT000741.2	NONRATT000741.2	PMID24510058	Gas2.cSep08	-	1:107305633-107313438	300	0.138609	0.473519	0.471432	0.441452	0.454606	0.306901	1	3	3	3	3	2
NONRATT020644.2	NONRATT020644.2	PMID24510058	Smyd5.bSep08	-	4:117222859-117223581	246	0.169036	0.192487	0.383343	0.538356	0.184737	0.37427	1	1	2	3	1	2
NONRATT021002.2	NONRATT021002.2	PMID24510058	chorwey.aSep08	-	4:174863021-174865449	390	0.533215	0.72849	0.967203	0.339579	0.466223	0.590255	5	6	8	3	4	5
NONRATT011970.2	NONRATT011970.2	PMID24510058	Aga.fSep08-unspliced	-	16:41233327-41234086	760	3.99456	4.3616	5.70746	4.76247	3.76826	4.66419	73	70	92	82	63	77
NONRATT030254.2	NONRATT030254.2	PMID24510058	Ngef.cSep08	-	9:94572651-94573532	502	0.331337	0.471632	0.375706	0.175848	0.362205	0.458564	4	5	4	2	4	5
ENSRNOT00000081418	NONRATT031377.1	ensembl	-	AABR07002677.2	1:80372505-80382703	876	6.07666	4.97329	11.3565	10.4807	10.3786	10.1426	128	92	211	208	200	193
NONRATT030512.2	NONRATT030512.2	PMID24510058	torbar.aSep08-unspliced	-	X:33709291-33709764	474	0.263182	0	0	0.0931647	0	0	3	0	0	1	0	0
NONRATT024027.2	NONRATT024027.2	PMID24510058	MutS_V.0.bSep08-unspliced	-	6:11661456-11662390	935	0.756136	0.202575	0.554694	0.519292	0.486193	0.393884	17	4	11	11	10	8
NONRATT001982.2	NONRATT001982.2	PMID24510058	fleyflar.aSep08-unspliced	-	1:15797937-15799725	1789	14.738	14.9555	16.2344	14.7791	12.4254	15.1052	634	565	616	599	489	587
NONRATT007656.2	NONRATT007656.2	PMID24510058	flawlor.aSep08-unspliced	-	12:52057783-52058694	912	0.911991	0.986549	1.08564	0.629182	1.24611	1.00954	20	19	21	13	25	20
NONRATT010370.2	NONRATT010370.2	PMID24510058	RGD1308093.eSep08	-	15:28399589-28401945	1281	0.649286	0.628438	0.84653	1.27491	0.922637	0.862486	20	17	23	37	26	24
NONRATT002358.2	NONRATT002358.2	PMID24510058	KA1.0.aSep08-unspliced	-	1:80335470-80336633	1164	0.285827	0.406843	0.243047	0.265453	0.937292	0.593257	8	10	6	7	24	15
NONRATT031123.2	NONRATT031123.2	PMID24510058	M6pr.bSep08	-	X:88317191-88321836	707	0.823535	0.803775	0.400151	0.124859	0.0642789	0.911588	14	12	6	2	1	14
NONRATT000412.2	NONRATT000412.2	PMID24510058	KH_1.3.aSep08	-	1:79855911-79865061	455	0.639823	0.31221	0.621773	0.873104	0.69936	0.607058	7	3	6	9	7	6
NONRATT020759.2	NONRATT020759.2	PMID24510058	Trnt1.cSep08-unspliced	-	4:138865383-138865950	568	1.2447	1.33394	1.90916	1.32106	1.04044	1.21576	17	16	23	17	13	15
NONRATT019153.2	NONRATT019153.2	PMID24510058	Fnbp1.fSep08	-	3:9865701-9868732	298	0.279079	1.90694	1.1075	1.18491	1.22031	1.08144	2	12	7	8	8	7
NONRATT000364.2	NONRATT000364.2	PMID24510058	sperfley.aSep08-unspliced	-	1:72323337-72323711	375	0.221775	0.126272	0.125673	0.11776	0.363685	0.122823	2	1	1	1	3	1
NONRATT005511.2	NONRATT005511.2	PMID24510058	RGD1310324.aSep08	-	10:48587106-48593320	607	0.68512	0.390048	0.388356	0.509039	0.674045	1.21345	10	5	5	7	9	16
NONRATT017633.2	NONRATT017633.2	PMID24510058	fada.aSep08-unspliced	-	20:8081536-8081933	398	0.417917	0.475898	0	0.110955	0.685335	0.347058	4	4	0	1	6	3
NONRATT017992.2	NONRATT017992.2	PMID24510058	Pkn3.hSep08	-	3:8629452-8635595	519	0.160242	0.27371	0.090804	0.255175	0.175215	0.1774	2	3	1	3	2	2
NONRATT028048.2	NONRATT028048.2	PMID24510058	Ihpk2.dSep08-unspliced	-	8:117589265-117590162	898	6.80769	11.2322	5.88039	8.40523	8.4538	11.0733	147	213	112	171	167	216
NONRATT019232.2	NONRATT019232.2	PMID24510058	swacho.aSep08-unspliced	-	3:14648476-14648808	333	6.74387	7.11031	10.3358	11.7972	7.50804	10.3685	54	50	73	89	55	75
NONRATT027083.2	NONRATT027083.2	PMID24510058	Apol9a.fSep08	-	7:118928197-118929394	735	0.678957	0.257697	0.705631	1.14101	0.61849	0.313196	12	4	11	19	10	5
NONRATT026290.2	NONRATT026290.2	-	-	-	7:142106457-142107495	593	2.66493	1.99636	2.14673	2.08415	3.52627	2.71713	38	25	27	28	46	35
NONRATT016574.2	NONRATT016574.2	PMID24510058	Mapbpip.fSep08	-	2:187912435-187914749	514	2.67002	1.9347	2.66014	2.91979	3.44916	1.61213	33	21	29	34	39	18
NONRATT004389.2	NONRATT004389.2	PMID24510058	skoyny.aSep08-unspliced	-	10:50980264-50981163	900	0.0462031	0	0.0523637	0.147151	0.151535	0	1	0	1	3	3	0
NONRATT027192.2	NONRATT027192.2	PMID24510058	klysoy.aSep08-unspliced	-	7:125461405-125463261	1857	7.68143	8.54268	8.81016	9.57908	9.84068	10.2881	343	335	347	403	402	415
NONRATT024166.2	NONRATT024166.2	PMID24510058	nutee.aSep08-unspliced	-	6:42914103-42914581	479	0.260435	0.296567	0.787493	0.184291	0.189847	0.576641	3	3	8	2	2	6
NONRATT024050.2	NONRATT024050.2	PMID24510058	Memo1.dSep08	-	6:22362485-22366019	568	3.22155	2.00087	2.07519	2.17589	2.56102	2.18833	44	24	25	28	32	27
NONRATT023760.2	NONRATT023760.2	-	-	-	5:157342053-157344523	2471	3.02942	2.74047	3.12922	3.75127	3.7897	3.39075	180	143	164	210	206	182
NONRATT013541.2	NONRATT013541.2	PMID24510058	skardoy.bSep08	-	18:64104624-64106991	741	0.392874	0.383416	0.318127	0.178726	0.490761	0.186409	7	6	5	3	8	3
NONRATT018715.2	NONRATT018715.2	PMID24510058	Gins1.bSep08	-	3:146695343-146712327	651	0.383313	0.50916	0.289715	0.0678342	0.139687	0.282858	6	7	4	1	2	4
NONRATT019601.2	NONRATT019601.2	PMID24510058	toychy.aSep08	-	3:111260717-111265836	394	0.633342	0.360547	0.358958	0.448099	0.46149	0.701044	6	3	3	4	4	6
NONRATT004650.2	NONRATT004650.2	PMID24510058	Zfp207.bSep08	-	10:67765275-67774327	1263	4.21469	3.71189	3.3224	5.06751	4.17507	3.82721	128	99	89	145	116	105
NONRATT024564.2	NONRATT024564.2	PMID24510058	beyvy.aSep08-unspliced	-	6:124218297-124218626	330	0	1.57854	2.00021	0	0	1.39501	0	11	14	0	0	10
NONRATT013573.2	NONRATT013573.2	PMID24510058	Acaa2.dSep08	-	18:70734003-70736887	392	2.22785	2.29524	3.84883	2.58989	2.43527	3.7581	21	19	32	23	21	32
NONRATT018368.2	NONRATT018368.2	PMID24510058	Nyw1.fSep08-unspliced	-	3:80801818-80802394	577	1.22528	1.80552	1.63427	1.37699	1.10298	1.43611	17	22	20	18	14	18
NONRATT021220.2	NONRATT021220.2	PMID24510058	merwoy.aSep08-unspliced	-	4:30544835-30546060	1226	35.3118	39.8612	23.1896	16.3094	19.3549	23.3935	1041	1032	603	453	522	623
NONRATT009134.2	NONRATT009134.2	PMID24510058	floykee.aSep08	-	13:111303976-111426131	386	0.215455	0.245346	0.244306	0.228693	0.235587	0.238524	2	2	2	2	2	2
NONRATT008770.2	NONRATT008770.2	PMID24510058	Crb1.dSep08	-	13:56270995-56276350	354	0.117465	0	0.133128	0.124746	0.128376	0	1	0	1	1	1	0
NONRATT010033.2	NONRATT010033.2	PMID24510058	Add1.dSep08	-	14:81379881-81381114	650	7.03782	7.35818	9.86488	12.5629	9.16158	13.315	110	101	136	185	131	188
NONRATT004677.2	NONRATT004677.2	PMID24510058	smeemee.dSep08	-	10:71850177-71860352	471	0.971233	1.50812	1.90191	1.78055	0.772089	1.17287	11	15	19	19	8	12
NONRATT013369.2	NONRATT013369.2	PMID24510058	Ik.gSep08	-	18:29587891-29588951	234	0.710816	0.607075	0.403001	0.565964	0.582828	0.786927	4	3	2	3	3	4
NONRATT020334.2	NONRATT020334.2	PMID24510058	LOC685920.aSep08-unspliced	-	4:58813140-58813529	390	1.70617	1.09286	1.32984	1.13174	1.51531	1.53457	16	9	11	10	13	13
NONRATT018057.2	NONRATT018057.2	PMID24510058	sworcha.aSep08	-	3:12523946-12526147	919	0.180991	0.103051	0.0512811	0.192112	0.247304	0.100185	4	2	1	4	5	2
NONRATT021216.2	NONRATT021216.2	PMID24510058	Bet1.dSep08	-	4:29083111-29092706	689	0	6.73551	0	0	0	0	0	98	0	0	0	0
NONRATT024762.2	NONRATT024762.2	PMID24510058	Sfrs7.gSep08	-	6:2880526-2884549	1259	2.01496	2.14392	3.63256	2.76969	3.24958	3.43717	61	57	97	79	90	94
NONRATT029409.2	NONRATT029409.2	PMID24510058	Bzw1.cSep08	-	9:65280122-65285687	395	0	0.119878	0.11931	0.111798	0.115051	0.116604	0	1	1	1	1	1
NONRATT007468.2	NONRATT007468.2	PMID24510058	Ncor2.fSep08-unspliced	-	12:37031624-37032015	392	1.06089	2.05364	2.40555	2.25204	1.97143	2.7011	10	17	20	20	17	23
NONRATT014693.2	NONRATT014693.2	PMID24510058	Zfp821.cSep08	-	19:41947482-41957534	379	1.42643	0.999512	1.49279	0.931668	0.839601	0.971719	13	8	12	8	7	8
NONRATT015154.2	NONRATT015154.2	PMID24510058	gushee.aSep08	-	2:93715083-93724649	870	0.525805	0.544328	0.975486	1.2684	0.78375	0.634968	11	10	18	25	15	12
NONRATT029450.2	NONRATT029450.2	-	-	-	9:68933066-68934163	1098	0.37875	0.474424	0.815847	0.442202	0.455406	0.545065	10	11	19	11	11	13
NONRATT002356.2	NONRATT002356.2	PMID24510058	Klc3.bSep08	-	1:80306161-80306586	265	0.156916	0.357373	0.177839	0.499757	0.171491	0.173806	1	2	1	3	1	1
NONRATT011066.2	NONRATT011066.2	PMID24510058	Epb4.9.eSep08	-	15:52307917-52325990	423	0.589921	0.559715	0.780223	0.208689	0.107435	0	6	5	7	2	1	0
NONRATT015894.2	NONRATT015894.2	PMID24510058	plawfla.aSep08-unspliced	-	2:258002491-258002934	444	0.468365	0.106648	0.318535	0.497097	0.204812	0.311101	5	1	3	5	2	3
NONRATT009788.2	NONRATT009788.2	-	-	-	14:17969430-17971324	1895	0.438911	0.424817	0.298557	0.302804	0.983515	0.364407	20	17	12	13	41	15
NONRATT023807.2	NONRATT023807.2	PMID24510058	RGD1563444.bSep08	-	5:160464210-160471912	1032	0.0402934	0	0.045666	0	0	0.0446303	1	0	1	0	0	1
NONRATT027817.2	NONRATT027817.2	PMID24510058	speyrar.aSep08-unspliced	-	8:72053108-72053497	390	0.533215	0.48566	1.08804	1.13174	0.349697	0.708234	5	4	9	10	3	6
NONRATT013137.2	NONRATT013137.2	PMID24510058	C1ql3.bSep08-unspliced	-	17:80311803-80315494	3055	0.149738	0.186013	0.0462945	0.0433505	0.193444	0.34659	11	12	3	3	13	23
NONRATT023254.2	NONRATT023254.2	PMID24510058	zuvor.aSep08-unspliced	-	5:74248996-74249709	714	0.0582392	0.0663191	0.0660046	0.0618488	0.127362	0.0645077	1	1	1	1	2	1
NONRATT021664.2	NONRATT021664.2	PMID24510058	starzee.aSep08-unspliced	-	4:129658080-129659912	1833	0.612578	12.6589	10.2888	19.3368	8.13433	8.21264	27	490	400	803	328	327
NONRATT013980.2	NONRATT013980.2	PMID24510058	sheefee.aSep08-unspliced	-	18:86413835-86414445	611	0.0680569	0	0.0771314	0	0.0743784	0.0753822	1	0	1	0	1	1
NONRATT024675.2	NONRATT024675.2	PMID24510058	vavu.aSep08-unspliced	-	6:135828296-135829006	711	3.68494	3.86294	3.91245	4.96653	4.28369	3.88489	63	58	59	80	67	60
NONRATT015658.2	NONRATT015658.2	PMID24510058	Phtf1.cSep08	-	2:206488781-206490379	755	0.991484	1.31713	1.24897	0.935429	1.08377	1.15853	18	21	20	16	18	19
NONRATT011691.2	NONRATT011691.2	PMID24510058	sparlo.aSep08-unspliced	-	16:691199-691688	490	0.933573	1.35301	3.07906	2.16194	2.31929	2.34878	11	14	32	24	25	25
NONRATT024554.2	NONRATT024554.2	PMID24510058	Ttc8.dSep08	-	6:122937782-122954283	422	0.0985373	0.673249	0.44693	0.209184	0.430869	0.109143	1	6	4	2	4	1
NONRATT018984.2	NONRATT018984.2	PMID24510058	Rtel1.iSep08	-	3:176853935-176862722	473	0.0879128	0.10011	0.0996349	0	0	0.0973753	1	1	1	0	0	1
NONRATT017112.2	NONRATT017112.2	PMID24510058	Vars2.cSep08	-	20:4993664-4994415	570	0.583688	0.996963	0.827129	0.696952	0.637989	0.565386	8	12	10	9	8	7
NONRATT017262.2	NONRATT017262.2	PMID24510058	sheybor.aSep08	-	20:11208783-11211914	283	1.02869	1.17125	1.1662	0.156043	0.32133	0.325337	7	7	7	1	2	2
MSTRG.15278.1	-	-	-	-	4:12453243-12462944	9674	1.5218	1.30208	3.09481	1.76121	2.00177	2.48406	354	266	635	386	426	522
NONRATT003209.2	NONRATT003209.2	PMID24510058	shawgley.aSep08-unspliced	-	1:198801543-198801925	383	0	0	0.123048	0	0.118656	0.240393	0	0	1	0	1	2
NONRATT011058.2	NONRATT011058.2	PMID24510058	DUF1725.124.aSep08-unspliced	-	15:51974044-51974669	626	0.132852	0.226926	0.225926	0.423046	0	0	2	3	3	6	0	0
NONRATT003317.2	NONRATT003317.2	-	-	-	1:212319064-212320022	701	0.0593192	0	0	0.125928	0	0	1	0	0	2	0	0
NONRATT023004.2	NONRATT023004.2	PMID24510058	Adhfe1.dSep08	-	5:9423652-9429717	906	2.52461	3.13604	5.09992	5.79762	2.85995	3.96335	55	60	98	119	57	78
NONRATT026124.2	NONRATT026124.2	PMID24510058	Map3k7ip1.bSep08	-	7:121379154-121382100	1775	0	0.293475	0	0	0	0.414965	0	11	0	0	0	16
NONRATT014879.2	NONRATT014879.2	PMID24510058	LOC684998.bSep08	-	2:5580646-5633337	443	0.0938663	0.106889	0.212872	0.199268	0.102585	0.10397	1	1	2	2	1	1
NONRATT004925.2	NONRATT004925.2	PMID24510058	Arf4l.bSep08	-	10:89585466-89592935	500	0	0.0947037	0	0.0883201	0.0908904	0	0	1	0	1	1	0
NONRATT000690.2	NONRATT000690.2	PMID24510058	Nosip.eSep08	-	1:101055596-101069898	779	3.52342	3.22181	3.38937	5.89288	4.60999	3.84128	66	53	56	104	79	65
NONRATT001218.2	NONRATT001218.2	PMID24510058	Zfp553.aSep08-unspliced	-	1:198683952-198685152	1201	6.05974	4.73152	4.75015	6.61545	6.24528	6.47799	175	120	121	180	165	169
NONRATT016712.2	NONRATT016712.2	PMID24510058	shyshee.aSep08	-	2:203032633-203033269	550	2.11716	2.66909	2.74317	3.12989	2.81009	3.6829	28	31	32	39	34	44
NONRATT020132.2	NONRATT020132.2	PMID24510058	Cdk5.dSep08	-	4:7286600-7287422	696	0.597511	1.08862	0.948374	0.824445	0.914393	0.992172	10	16	14	13	14	15
NONRATT001668.2	NONRATT001668.2	PMID24510058	Uhrf2.eSep08	-	1:248286581-248291275	753	0.71795	0.817558	1.12706	0.9965	0.784823	0.978172	13	13	18	17	13	16
NONRATT018255.2	NONRATT018255.2	-	-	-	3:58541257-58542092	393	0.105809	0.240976	0.359872	0.22462	0.231391	0.234276	1	2	3	2	2	2
NONRATT010476.2	NONRATT010476.2	PMID24510058	snujo.aSep08-unspliced	-	15:37229261-37230432	1172	1.49034	2.58593	2.81603	2.07141	2.40477	2.98526	42	64	70	55	62	76
NONRATT005424.2	NONRATT005424.2	PMID24510058	Leap2.bSep08	-	10:38773403-38774447	399	0.312652	0.118676	1.0635	0.884968	0.569604	2.07678	3	1	9	8	5	18
NONRATT023274.2	NONRATT023274.2	PMID24510058	Lpar1.eSep08	-	5:75604089-75674079	351	0	0.134906	0.134266	0.125812	0.129474	0.131221	0	1	1	1	1	1
NONRATT019475.2	NONRATT019475.2	PMID24510058	norchey.aSep08-unspliced	-	3:81330715-81331239	525	1.66346	1.71378	1.61652	1.34524	1.64512	1.49071	21	19	18	16	19	17
NONRATT001546.2	NONRATT001546.2	PMID24510058	Syt7.cSep08-unspliced	-	1:226483836-226484372	537	0.0774353	0.0881785	0.351219	0.0822348	0.0846279	0.171453	1	1	4	1	1	2
NONRATT023387.2	NONRATT023387.2	-	-	-	5:113548641-113551849	1241	3.0495	3.81585	1.93762	1.60057	1.64838	2.29994	91	100	51	45	45	62
NONRATT001393.2	NONRATT001393.2	PMID24510058	Suv420h1.bSep08-unspliced	-	1:219039021-219039938	918	2.17448	2.16653	3.23568	1.63483	2.32737	2.10624	48	42	63	34	47	42
NONRATT006776.2	NONRATT006776.2	PMID24510058	peeloy.bSep08	-	11:89516488-89517545	383	0.434285	0.370902	0.615488	0.1153	0.237432	0.240393	4	3	5	1	2	2
NONRATT031157.2	NONRATT031157.2	PMID24510058	tarby.aSep08-unspliced	-	X:106306053-106306433	381	0.436564	0.248566	0.866231	0.810989	1.07387	1.20827	4	2	7	7	9	10
NONRATT007053.2	NONRATT007053.2	PMID24510058	barmar.aSep08-unspliced	-	11:70469971-70470372	402	0.413759	0.824535	0.703748	1.20781	1.01777	0.801666	4	7	6	11	9	7
MSTRG.19086.3	-	-	-	-	6:135475484-135477833	2329	1.57135	1.46394	2.61148	2.36903	2.0299	2.56963	88	72	129	125	104	130
NONRATT013315.2	NONRATT013315.2	PMID24510058	shudoy.aSep08	-	18:27562215-27567244	348	1.31451	0.680343	3.11611	0.253665	0.783803	1.32285	11	5	23	2	6	10
NONRATT013830.2	NONRATT013830.2	PMID24510058	March3.cSep08	-	18:52031835-52049723	1126	0.0369296	0	0.544353	0	0.928522	0.0409045	1	0	13	0	23	1
NONRATT014463.2	NONRATT014463.2	PMID24510058	LOC689288.aSep08	-	19:10860963-10866272	882	0.094292	0.161061	0.0534323	0.100086	0.154628	0.156609	2	3	1	2	3	3
NONRATT019536.2	NONRATT019536.2	PMID24510058	rawchy.aSep08	-	3:94739695-94745238	383	1.62878	1.23646	2.21586	1.38302	1.78032	1.92314	15	10	18	12	15	16
NONRATT023615.2	NONRATT023615.2	PMID24510058	Zmym4.bSep08	-	5:144939722-144942516	665	1.12567	1.5666	2.41059	2.58863	1.5722	2.2153	18	22	34	39	23	32
NONRATT015941.2	NONRATT015941.2	PMID24510058	LOC685771.aSep08-unspliced	-	2:12213397-12213874	478	0.69603	0.7925	1.47959	1.38512	1.23634	1.54093	8	8	15	15	13	16
NONRATT009314.2	NONRATT009314.2	PMID24510058	royka.aSep08-unspliced	-	14:35716764-35717463	700	2.31698	2.50302	2.82893	2.4592	2.59759	3.2225	39	37	42	39	40	49
ENSRNOT00000090732	NONRATT033524.1	ensembl	-	AABR07056624.1	7:33239040-33244969	406	0.717043	0.816412	2.09033	2.28304	1.67946	0.793768	7	7	18	21	15	7
NONRATT015656.2	NONRATT015656.2	PMID24510058	blashee.aSep08	-	2:206453539-206473945	1036	1.80639	2.23975	2.86714	3.36587	2.36943	2.26623	45	49	63	79	54	51
ENSRNOT00000085769	NONRATT032803.1	ensembl	-	AABR07045378.1	20:45682816-45684630	620	0.201207	0.229122	0.0760118	0.14238	0.0732987	0.222789	3	3	1	2	1	3
NONRATT012346.2	NONRATT012346.2	PMID24510058	Phf2.bSep08-unspliced	-	17:16268702-16269440	739	1.01295	0.76897	1.33979	1.43349	2.02991	1.12129	18	12	21	24	33	18
MSTRG.12027.1	-	-	-	-	2:185395683-185396299	532	1.40709	2.13626	2.3042	1.90834	1.70899	1.64416	18	24	26	23	20	19
NONRATT012045.2	NONRATT012045.2	-	-	-	16:62222520-62240030	295	4.08821	2.40788	1.43843	3.74072	4.46874	2.80893	29	15	9	25	29	18
NONRATT029309.2	NONRATT029309.2	PMID24510058	deynoy.aSep08	-	9:41292818-41295952	343	0.242465	0.138052	0.274934	0.128747	0.265121	0.134281	2	1	2	1	2	1
NONRATT012158.2	NONRATT012158.2	PMID24510058	LOC689486.aSep08	-	16:83795198-83824279	377	0.220598	0	0.250139	0.117135	0.120544	0.244219	2	0	2	1	1	2
NONRATT019985.2	NONRATT019985.2	PMID24510058	RGD1306344.bSep08	-	3:163808561-163814732	372	0.223563	0.12729	0.253501	0.2373	0.122165	0.371314	2	1	2	2	1	3
NONRATT025008.2	NONRATT025008.2	-	-	-	6:75565833-75580149	2450	3.98898	0.869785	0.423379	0.576512	2.05953	1.87903	235	45	22	32	111	100
NONRATT017651.2	NONRATT017651.2	PMID24510058	blorda.aSep08-unspliced	-	20:10883953-10884512	560	29.111	27.4826	38.4764	34.6025	27.4372	33.1295	392	325	457	439	338	403
NONRATT019114.2	NONRATT019114.2	-	-	-	3:7144700-7148646	1030	1.21127	1.14936	0.91551	1.19991	0.838533	1.43027	30	25	20	28	19	32
NONRATT001542.2	NONRATT001542.2	PMID24510058	speekla.aSep08-unspliced	-	1:226239213-226239782	570	0.218857	0.332294	0.579007	0.696952	0.478532	1.04997	3	4	7	9	6	13
NONRATT026601.2	NONRATT026601.2	-	-	-	7:18600192-18612104	959	0.910655	0.691317	0.589954	0.690395	0.663626	0.528061	21	14	12	15	14	11
NONRATT008964.2	NONRATT008964.2	PMID24510058	LOC688466.eSep08-unspliced	-	13:89657885-89658488	604	1.10166	1.17603	1.24896	0.876984	1.73099	0.838428	16	15	16	12	23	11
NONRATT005751.2	NONRATT005751.2	PMID24510058	Pigs.cSep08-unspliced	-	10:65601612-65602053	442	0.376315	0.749917	1.06666	0.798874	0.617112	0.520813	4	7	10	8	6	5
NONRATT018342.2	NONRATT018342.2	PMID24510058	Fnbp4.cSep08	-	3:79591294-79597522	485	4.45886	4.88193	2.23589	4.64152	4.0303	3.03747	52	50	23	51	43	32
NONRATT012370.2	NONRATT012370.2	PMID24510058	jyfoy.aSep08-unspliced	-	17:19538187-19540029	1843	7.76234	8.35065	12.4842	12.5977	11.716	13.6884	344	325	488	526	475	548
MSTRG.7325.1	-	-	-	-	14:79299965-79304619	4446	1.9456	2.31127	2.84205	2.36286	2.30051	2.12267	208	217	268	238	225	205
NONRATT017004.2	NONRATT017004.2	PMID24510058	speybor.aSep08-unspliced	-	20:263088-263377	290	0.860472	1.63298	11.218	5.02281	4.54579	6.34984	6	10	69	33	29	40
NONRATT028097.2	NONRATT028097.2	PMID24510058	buror.aSep08-unspliced	-	8:119174988-119176742	1755	1.01895	0.512668	1.10147	1.333	1.321	1.83619	43	19	41	53	51	70
NONRATT003299.2	NONRATT003299.2	PMID24510058	sleeflu.aSep08	-	1:209710804-209748949	952	0.698954	0.596921	0	0	1.62348	1.01551	16	12	0	0	34	21
ENSRNOT00000082231	ENSRNOT00000082231	ensembl:lincRNA	-	AABR07058907.2	7:142300414-142302934	1377	0.0603962	0.0687754	0.0684839	0.096177	0.132046	0	2	2	2	3	4	0
NONRATT007277.2	NONRATT007277.2	-	-	-	12:12399837-12401480	406	0.614623	0.699781	1.04516	0.761051	1.11968	0.340219	6	6	9	7	10	3
NONRATT014289.2	NONRATT014289.2	PMID24510058	LOC690769.dSep08-unspliced	-	19:43821601-43822110	510	0.815427	1.67133	2.03388	1.73098	1.69351	0.992962	10	18	22	20	19	11
NONRATT019126.2	NONRATT019126.2	PMID24510058	Zer1.bSep08	-	3:8662579-8665665	1688	0.246367	0.420809	1.20105	0.784466	0.780971	0.599985	10	15	43	30	29	22
NONRATT013002.2	NONRATT013002.2	-	-	-	17:56061567-56068110	828	9.24158	8.69312	6.77618	5.9706	4.72149	4.28114	184	152	119	112	86	77
NONRATT025825.2	NONRATT025825.2	PMID24510058	Mdm1.dSep08	-	7:61164497-61175781	735	0.0565752	0.0644243	0.0641188	0.0600817	0.0618302	0.0626647	1	1	1	1	1	1
NONRATT027686.2	NONRATT027686.2	PMID24510058	Arhgap20.bSep08-unspliced	-	8:56256463-56257101	639	0.260299	0.444619	0.0737516	0.276293	0.355668	0.0720791	4	6	1	4	5	1
NONRATT005745.2	NONRATT005745.2	PMID24510058	Poldip2.eSep08-unspliced	-	10:65787077-65787503	427	1.94786	2.32889	1.76668	2.89439	2.23566	1.94059	20	21	16	28	21	18
NONRATT011629.2	NONRATT011629.2	PMID24510058	Ikbkb.bSep08	-	16:74220071-74223520	700	0.772309	1.0824	1.14507	0.945842	1.36375	0.789175	13	16	17	15	21	12
NONRATT020450.2	NONRATT020450.2	PMID24510058	Gimap1.cSep08	-	4:78371366-78372224	365	0.341776	0	0	0.483702	0.373649	0.504495	3	0	0	4	3	4
NONRATT019550.2	NONRATT019550.2	PMID24510058	Dph4.aSep08	-	3:96025516-96064900	534	0.389427	0.709391	0.794638	0.413317	0.3405	0.862083	5	8	9	5	4	10
NONRATT030079.2	NONRATT030079.2	-	-	-	9:66861615-66878713	920	4.79158	3.706	3.17737	3.16655	3.70582	2.50196	106	72	62	66	75	50
NONRATT010905.2	NONRATT010905.2	PMID24510058	Dhrs1.hSep08-unspliced	-	15:34427636-34428069	434	0.958221	0.545528	2.49863	2.74605	3.45647	2.54573	10	5	23	27	33	24
ENSRNOT00000084383	NONRATT033825.1	ensembl	-	AABR07037104.1	X:12882260-12885286	343	0.121233	0.138052	0	0	0.132493	0.134281	1	1	0	0	1	1
NONRATT020878.2	NONRATT020878.2	PMID24510058	Mfap5.bSep08	-	4:155332842-155334290	665	0.0625305	0.0712058	0.212676	0.0664061	0.0683387	0.0692609	1	1	3	1	1	1
NONRATT029317.2	NONRATT029317.2	PMID24510058	borpu.aSep08-unspliced	-	9:43093164-43093465	302	0.137691	0.156794	0.312259	0.146225	0.301114	0.152512	1	1	2	1	2	1
NONRATT006309.2	NONRATT006309.2	PMID24510058	Sfrs2.cSep08	-	10:105792781-105794021	644	2.38932	1.91179	1.83029	2.26182	1.62347	2.00153	37	26	25	33	23	28
NONRATT010774.2	NONRATT010774.2	PMID24510058	Synpr.cSep08	-	15:14565436-14729243	571	0.218473	0	0.0825347	0	0.0795888	0.0806629	3	0	1	0	1	1
NONRATT001702.2	NONRATT001702.2	PMID24510058	keeflo.aSep08	-	1:256062169-256068948	350	1.307	1.21775	1.48183	0.88282	0.779324	0.657712	11	9	11	7	6	5
NONRATT021900.2	NONRATT021900.2	PMID24510058	glawzor.aSep08-unspliced	-	4:160058732-160059982	1251	0.398908	0.227107	0.452251	0.635112	0.218036	0.58878	12	6	12	18	6	16
NONRATT000911.2	NONRATT000911.2	PMID24510058	Ard1.eSep08-unspliced	-	X:156867614-156869192	1579	1.34323	0.899715	1.22424	1.25796	1.15156	1.28283	51	30	41	45	40	44
NONRATT017622.2	NONRATT017622.2	PMID24510058	Rps10.bSep08-unspliced	-	20:7219444-7220293	850	2.49525	3.34265	1.71955	1.4021	0.481347	2.43719	51	60	31	27	9	45
NONRATT011752.2	NONRATT011752.2	PMID24510058	Phf7.bSep08	-	16:7323529-7336316	1387	0	0	0.169958	0	0	0	0	0	5	0	0	0
NONRATT016046.2	NONRATT016046.2	PMID24510058	stoyshey.aSep08-unspliced	-	2:30782134-30782910	777	0	0.0609419	0.364102	0	0	0.0592774	0	1	6	0	0	1
NONRATT028037.2	NONRATT028037.2	-	-	-	8:116781952-116811420	739	8.61008	8.58664	8.99581	10.811	9.65754	9.03278	153	134	141	181	157	145
NONRATT007609.2	NONRATT007609.2	-	-	-	12:47130655-47132368	703	3.25362	3.23333	3.28633	1.88361	2.71586	2.75039	55	48	49	30	42	42
NONRATT009271.2	NONRATT009271.2	PMID24510058	glujoy.aSep08-unspliced	-	14:21039432-21040183	752	0.110592	0.125936	0.0626693	0.293499	0.0604325	0.061248	2	2	1	5	1	1
NONRATT012348.2	NONRATT012348.2	PMID24510058	Ptpdc1.dSep08	-	17:16333415-16367044	422	2.36518	3.36647	3.01661	4.49772	3.33937	2.61812	24	30	27	43	31	24
NONRATT013013.2	NONRATT013013.2	PMID24510058	EPL1.1.aSep08-unspliced	-	17:57365281-57367211	1931	4.50115	4.85561	4.73682	4.77743	5.17906	4.81579	209	198	194	209	220	202
NONRATT003379.2	NONRATT003379.2	PMID24510058	Cars.dSep08-unspliced	-	1:216776030-216777427	1398	0.20824	0.304874	0.337242	0.315721	0.130062	0.493957	7	9	10	10	4	15
NONRATT021424.2	NONRATT021424.2	PMID24510058	Hnrnpa2b1.gSep08	-	4:81235171-81238639	697	2.14798	1.49467	2.50283	1.26657	1.69569	2.11359	36	22	37	20	26	32
NONRATT007534.2	NONRATT007534.2	PMID24510058	RGD1310861.aSep08	-	12:39679582-39688831	1140	0.291844	0.0830735	0.372225	0.387174	0.398763	0.242291	8	2	9	10	10	6
NONRATT029307.2	NONRATT029307.2	PMID24510058	dernoy.aSep08-unspliced	-	9:41100448-41101108	661	0.251635	0.0716367	0.142666	0	0	0	4	1	2	0	0	0
NONRATT030200.2	NONRATT030200.2	PMID24510058	torpaw.aSep08-unspliced	-	9:83222336-83222843	508	0.163712	0.279637	0.556903	0.2607	0.626395	0.453148	2	3	6	3	7	5
NONRATT011452.2	NONRATT011452.2	PMID24510058	veegar.aSep08	-	16:23495702-23556071	307	0.541795	0.154241	0.460683	0.287543	0.29621	0.449931	4	1	3	2	2	3
NONRATT025854.2	NONRATT025854.2	PMID24510058	Mon2.dSep08	-	7:66717468-66735927	260	0.319867	1.45698	0.362701	0.679043	1.39867	1.2395	2	8	2	4	8	7
NONRATT015991.2	NONRATT015991.2	PMID24510058	IQ.7.bSep08-unspliced	-	2:26216385-26217143	759	0.438343	0.811095	1.05605	0.46522	0.598933	0.48522	8	13	17	8	10	8
NONRATT021791.2	NONRATT021791.2	PMID24510058	plyzey.aSep08-unspliced	-	4:152481917-152482316	400	6.13416	8.64218	18.7414	13.1316	11.8191	15.9975	59	73	159	119	104	139
NONRATT006683.2	NONRATT006683.2	PMID24510058	stymar.aSep08-unspliced	-	11:79733712-79734443	732	1.70438	1.8114	3.607	1.74872	2.17356	3.83636	30	28	56	29	35	61
NONRATT030087.2	NONRATT030087.2	PMID24510058	monoy.aSep08	-	9:69208409-69226602	732	0	0	0.0643816	0.060328	0	0.0629215	0	0	1	1	0	1
NONRATT011931.2	NONRATT011931.2	PMID24510058	Cbr4.cSep08-unspliced	-	16:31969521-31970278	758	0.658355	0.499756	0.746393	0.640551	1.01952	0.48586	12	8	12	11	17	8
NONRATT002868.2	NONRATT002868.2	PMID24510058	Cetn2.aSep08	-	X:152928668-152930771	557	0.448001	1.19026	0.761825	1.26795	0.816141	0.909175	6	14	9	16	10	11
NONRATT006886.2	NONRATT006886.2	PMID24510058	feymy.aSep08-unspliced	-	11:32418386-32419250	865	0	0	0.21804	0.153105	0.105129	0.0532468	0	0	4	3	2	1
NONRATT021003.2	NONRATT021003.2	PMID24510058	mawzoy.aSep08-unspliced	-	4:175603635-175604056	422	0.394149	1.34661	1.11721	0.418368	0.53856	0.32732	4	12	10	4	5	3
NONRATT030092.2	NONRATT030092.2	PMID24510058	wupar.aSep08-unspliced	-	9:72003316-72005815	2500	0.149714	1.21228	1.30129	1.46544	0.527312	0.699754	9	64	69	83	29	38
NONRATT005849.2	NONRATT005849.2	PMID24510058	Sept4.kSep08-unspliced	-	10:74881456-74882801	1346	1.23586	0.59809	2.03167	3.08256	3.00578	3.3176	40	17	58	94	89	97
NONRATT028852.2	NONRATT028852.2	PMID24510058	smawree.aSep08-unspliced	-	8:95963543-95963918	376	1.32722	0.755615	1.25389	0.821774	1.32988	1.83657	12	6	10	7	11	15
NONRATT030534.2	NONRATT030534.2	PMID24510058	soylar.aSep08-unspliced	-	X:46786381-46786663	283	0.293871	0.501963	0.166528	0.311928	0.32133	0.488088	2	3	1	2	2	3
NONRATT027195.2	NONRATT027195.2	PMID24510058	klorsoy.aSep08-unspliced	-	7:125744097-125745468	1372	5.33479	5.93658	8.38499	7.4317	7.65364	6.3417	176	172	244	231	231	189
NONRATT019538.2	NONRATT019538.2	PMID24510058	Prrg4.bSep08	-	3:94783860-94798468	1788	2.27939	0.900479	2.0568	1.57995	2.66951	1.72507	98	34	78	64	105	67
NONRATT008101.2	NONRATT008101.2	PMID24510058	LOC304558.aSep08	-	12:51592514-51702634	504	0.0825055	0.0939521	0.280614	0.17515	0.18043	0.091386	1	1	3	2	2	1
NONRATT015973.2	NONRATT015973.2	PMID24510058	Bhmt.cSep08-unspliced	-	2:23237398-23238169	772	0.26937	0.55209	0	0	0	0.178923	5	9	0	0	0	3
NONRATT030032.2	NONRATT030032.2	PMID24510058	weypo.aSep08-unspliced	-	9:61809803-61810482	680	0.0611511	0.0696351	0.0693049	0.129817	0.0668312	0.270795	1	1	1	2	1	4
NONRATT025193.2	NONRATT025193.2	PMID24510058	slortu.cSep08-unspliced	-	6:109164377-109165082	706	0.824701	1.0732	1.33566	1.00035	1.22336	1.1737	14	16	20	16	19	18
NONRATT023329.2	NONRATT023329.2	PMID24510058	LOC688541.aSep08-unspliced	-	5:90184030-90184690	661	0	0.0716367	0.071297	0.133549	0.0687522	0	0	1	1	2	1	0
ENSRNOT00000087316	NONRATT032262.1	ensembl	-	AC096938.1	16:82120400-82123561	630	0.264018	0.300647	1.27229	1.05094	0.505093	0.876861	4	4	17	15	7	12
ENSRNOT00000087311	NONRATT031507.1	ensembl	-	AABR07001762.1	1:56538964-56541508	631	0.593162	0.30017	0.597796	0.559592	0.936564	0.437736	9	4	8	8	13	6
ENSRNOT00000079931	NONRATT033190.1	ensembl	-	AABR07049134.4	5:107289156-107291659	741	0.168351	0.127805	0	0	0.122721	0	3	2	0	0	2	0
NONRATT028738.2	NONRATT028738.2	PMID24510058	rorpor.aSep08	-	8:77044510-77086818	410	0	0.115492	0.460011	0	0	0	0	1	4	0	0	0
NONRATT026194.2	NONRATT026194.2	PMID24510058	teesa.aSep08	-	7:126562654-126584312	679	6.00229	6.34647	7.56873	6.04568	8.36858	7.72917	98	91	109	93	125	114
NONRATT015963.2	NONRATT015963.2	-	-	-	2:21458964-21462176	1129	0.221025	0.29359	0.292324	0.273682	0.120799	0.407752	6	7	7	7	3	10
NONRATT006792.2	NONRATT006792.2	PMID24510058	zyloy.aSep08-unspliced	-	11:4167531-4169014	1484	0.224193	0.159541	0.222395	0.0892424	0.398229	0.434294	8	5	7	3	13	14
NONRATT031239.2	NONRATT031239.2	PMID24510058	LOC680517.aSep08-unspliced	-	X:118771059-118771547	489	0.170073	0	0	0	0.092935	0.376566	2	0	0	0	1	4
NONRATT009219.2	NONRATT009219.2	PMID24510058	neejey.bSep08	-	14:10842064-10849243	882	0.801573	2.46976	1.65716	0.150154	0.412306	1.77465	17	46	31	3	8	34
NONRATT003571.2	NONRATT003571.2	PMID24510058	Tmem138.fSep08	-	1:226624313-226628746	738	0.28178	0.449137	0.447201	0.717748	0.0615789	0.249513	5	7	7	12	1	4
NONRATT030238.2	NONRATT030238.2	PMID24510058	tornoy.bSep08	-	9:92380754-92382297	281	0.591925	1.01107	1.00679	0.471301	0.485344	0.655305	4	6	6	3	3	4
NONRATT008115.2	NONRATT008115.2	PMID24510058	Chfr.dSep08-unspliced	-	12:52563676-52564351	676	0.43065	0.840635	0.767217	0.195911	0.201748	0.408597	7	12	11	3	3	6
NONRATT018533.2	NONRATT018533.2	PMID24510058	lochoy.aSep08-unspliced	-	3:114122981-114123286	306	0.407674	0.154745	0.154011	0.144314	0.148514	0.300884	3	1	1	1	1	2
NONRATT010526.2	NONRATT010526.2	PMID24510058	Ppp2r2a.eSep08-unspliced	-	15:43674691-43675434	744	2.29179	2.03677	3.23197	3.02572	1.58857	3.52699	41	32	51	51	26	57
NONRATT026831.2	NONRATT026831.2	PMID24510058	Pip4k2c.bSep08-unspliced	-	7:70486144-70486547	404	1.74997	1.17219	1.40041	1.42033	2.02536	1.93718	17	10	12	13	18	17
NONRATT000526.2	NONRATT000526.2	PMID24510058	slafloy.aSep08-unspliced	-	1:84676624-84677051	428	3.59515	1.32773	3.08443	3.71273	3.18627	1.72094	37	12	28	36	30	16
NONRATT008545.2	NONRATT008545.2	PMID24510058	blokee.aSep08	-	13:105013431-105024040	576	0.0721923	0	0	0.153256	0	0	1	0	0	2	0	0
NONRATT022936.2	NONRATT022936.2	-	-	-	5:173265417-173267888	853	34.6641	39.86	39.9628	39.6896	36.0787	41.1248	711	718	723	767	677	762
NONRATT014694.2	NONRATT014694.2	PMID24510058	kerdey.aSep08-unspliced	-	19:41949000-41949874	875	0.903032	0.595334	1.02377	1.31157	1.091	0.841787	19	11	19	26	21	16
NONRATT017325.2	NONRATT017325.2	PMID24510058	gleebor.aSep08	-	20:20371825-20372669	652	5.03896	5.59246	5.13423	5.41595	4.8805	5.93099	79	77	71	80	70	84
NONRATT020691.2	NONRATT020691.2	PMID24510058	doyzee.aSep08-unspliced	-	4:119575032-119575444	413	0	0.114653	0.228335	0	0.110037	0	0	1	2	0	1	0
NONRATT014075.2	NONRATT014075.2	PMID24510058	merdar.cSep08	-	19:19896330-19904185	787	0.0528371	0.0601676	0.0598822	0.168279	0.173293	0.233978	1	1	1	3	3	4
NONRATT004627.2	NONRATT004627.2	PMID24510058	IQ.2.cSep08	-	10:64979273-64980158	574	0.362289	0.247484	0	0.384514	0	0	5	3	0	5	0	0
NONRATT013130.2	NONRATT013130.2	PMID24510058	Nmt2.bSep08-unspliced	-	17:78941391-78941769	379	0.548691	1.24951	1.99042	1.2811	1.43926	1.82204	5	10	16	11	12	15
NONRATT003612.2	NONRATT003612.2	PMID24510058	Cep78.cSep08-unspliced	-	1:233188373-233188898	526	0.39535	0.540135	0.986005	0.923076	0.86424	0.262603	5	6	11	11	10	3
NONRATT027536.2	NONRATT027536.2	PMID24510058	snara.aSep08-unspliced	-	8:31529514-31530118	605	3.57445	4.61802	3.11727	3.57498	3.9071	2.89154	52	59	40	49	52	38
NONRATT003771.2	NONRATT003771.2	PMID24510058	leyflo.bSep08-unspliced	-	1:260842028-260842318	291	1.14331	1.62737	0	0.758458	1.71834	1.58197	8	10	0	5	11	10
NONRATT029929.2	NONRATT029929.2	PMID24510058	farpu.aSep08-unspliced	-	9:43515179-43515647	348	4.78009	5.71515	4.60645	5.5809	6.53134	6.48204	40	42	34	44	50	49
NONRATT031108.2	NONRATT031108.2	PMID24510058	LOC503457.aSep08-unspliced	-	X:80927594-80928100	507	0.0820173	0.186792	0.0929533	0.261214	0.268997	0.0908452	1	2	1	3	3	1
NONRATT004471.2	NONRATT004471.2	PMID24510058	blomee.aSep08	-	10:56620141-56620938	697	1.25297	1.56261	1.6235	1.96318	1.50002	1.78332	21	23	24	31	23	27
NONRATT026923.2	NONRATT026923.2	PMID24510058	Ddef1.eSep08	-	7:104799001-104800532	735	0.678957	0.45097	0.962236	0.540493	0.432937	0.501064	12	7	15	9	7	8
NONRATT003033.2	NONRATT003033.2	-	-	-	1:170450203-170464212	631	0.922724	0.450256	1.868	0.279796	1.15263	1.09438	14	6	25	4	16	15
NONRATT008886.2	NONRATT008886.2	PMID24510058	sukee.aSep08	-	13:80548557-80553444	1143	17.8283	17.442	16.4174	10.7357	18.1753	13.0093	490	421	398	278	457	323
NONRATT031194.2	NONRATT031194.2	PMID24510058	Adcy6.bSep08-unspliced	-	7:140285541-140286141	601	1.17635	1.73342	2.51038	3.08465	3.47933	2.75759	17	22	32	42	46	36
NONRATT031089.2	NONRATT031089.2	PMID24510058	zoybee.aSep08-unspliced	-	X:76280507-76281232	726	0	0	0	0.0608265	0.0625967	0.0634415	0	0	0	1	1	1
NONRATT022792.2	NONRATT022792.2	PMID24510058	Akr7a2.bSep08-unspliced	-	5:157759445-157760039	595	0.908598	0.238749	1.66404	2.003	1.60441	1.23792	13	3	21	27	21	16
NONRATT004348.2	NONRATT004348.2	PMID24510058	M-rip.gSep08	-	10:46127692-46133570	940	7.91927	6.64981	5.1161	7.09058	7.06052	7.49309	179	132	102	151	146	153
NONRATT026150.2	NONRATT026150.2	PMID24510058	L3mbtl2.bSep08	-	7:122896926-122899837	526	3.55784	3.33101	3.31649	3.86013	3.19759	3.4133	45	37	37	46	37	39
NONRATT003624.2	NONRATT003624.2	PMID24510058	doflo.aSep08	-	1:235670588-235673914	458	0.635632	0.310165	0.4118	0.289161	0.595553	1.00514	7	3	4	3	6	10
NONRATT002538.2	NONRATT002538.2	PMID24510058	Gramd1a.eSep08	-	1:89566974-89567773	715	1.16327	0.927235	1.12104	1.66684	1.3987	1.48089	20	14	17	27	22	23
NONRATT002457.2	NONRATT002457.2	PMID24510058	Rps16.cSep08	-	1:85405753-85408391	644	9.16987	6.4708	5.27126	44.3455	10.4469	50.1821	142	88	72	647	148	702
NONRATT022068.2	NONRATT022068.2	PMID24510058	chorvo.eSep08-unspliced	-	5:16843319-16843823	505	0.905843	0.937753	0.653533	1.31107	1.44021	1.64086	11	10	7	15	16	18
NONRATT027169.2	NONRATT027169.2	PMID24510058	Cyp2d2.dSep08-unspliced	-	7:123654583-123655150	568	2.19648	5.50248	8.21778	21.7591	3.28127	7.69967	30	66	99	280	41	95
NONRATT004263.2	NONRATT004263.2	PMID24510058	teemee.aSep08	-	10:38944412-38951974	850	2.54417	1.44847	1.44216	3.16767	2.83446	2.32887	52	26	26	61	53	43
NONRATT023830.2	NONRATT023830.2	PMID24510058	RGD1565622.aSep08-unspliced	-	5:164421191-164497341	581	0.214713	0.244502	0.324621	0.076007	0.312955	0.158469	3	3	4	1	4	2
NONRATT017946.2	NONRATT017946.2	PMID24510058	snarchu.aSep08-unspliced	-	3:7265259-7266314	1056	0.236304	0.403611	0.178603	0.585202	0.473519	0.30518	6	9	4	14	11	7
NONRATT014959.2	NONRATT014959.2	PMID24510058	Mrps27.eSep08	-	2:29616246-29646176	597	0.348332	0.475898	0.552821	0.887266	0.533013	0.462665	5	6	7	12	7	6
NONRATT002045.2	NONRATT002045.2	PMID24510058	shoyfly.aSep08	-	1:32105524-32106696	262	0.793718	1.08439	0.89974	2.02175	1.73508	0.702828	5	6	5	12	10	4
NONRATT028488.2	NONRATT028488.2	PMID24510058	Mll1.dSep08-unspliced	-	8:49152221-49152768	548	1.13836	0.691268	1.37659	0.966602	1.24427	1.00807	15	8	16	12	15	12
NONRATT021693.2	NONRATT021693.2	PMID24510058	Rad18.dSep08	-	4:144609732-144616805	381	0.109141	0.124283	0.247513	0.115906	0.238678	0.120889	1	1	2	1	2	1
NONRATT013217.2	NONRATT013217.2	PMID24510058	Riok3.eSep08-unspliced	-	18:3576412-3577416	1005	2.48283	2.9214	5.20743	2.41561	2.80436	2.29036	60	62	111	55	62	50
NONRATT021063.2	NONRATT021063.2	PMID24510058	MGC72974.cSep08-unspliced	-	4:183664664-183665754	1091	1.6391	2.21364	1.77184	1.82063	1.95832	1.68786	43	51	41	45	47	40
NONRATT000631.2	NONRATT000631.2	PMID24510058	RGD1562094.aSep08-unspliced	-	1:98230009-98230938	930	0.44717	0.458294	0.811151	0.664488	0.928698	0.742528	10	9	16	14	19	15
NONRATT028491.2	NONRATT028491.2	PMID24510058	Cd3g.cSep08	-	8:49278271-49279617	342	0.121587	0	0	0.129123	0.132881	0.134674	1	0	0	1	1	1
NONRATT006228.2	NONRATT006228.2	PMID24510058	Abca5.bSep08	-	10:98581263-98582000	623	0.133492	0.152012	0.151368	0.141694	0.145965	0.0739302	2	2	2	2	2	1
NONRATT023488.2	NONRATT023488.2	-	-	-	5:135073170-135073739	570	0.0729522	0.166147	0.0826795	0.0774738	0.0797284	0	1	2	1	1	1	0
NONRATT013648.2	NONRATT013648.2	PMID24510058	Mtmr1.cSep08	-	18:322022-325377	914	0.545988	0	0	0	0.994727	0	12	0	0	0	20	0
NONRATT011890.2	NONRATT011890.2	PMID24510058	LOC361128.cSep08	-	16:21037883-21038495	405	0.924161	0.467673	0.46569	0.653893	0.67349	0.682003	9	4	4	6	6	6
NONRATT002447.2	NONRATT002447.2	PMID24510058	zf-C2H2.121.aSep08-unspliced	-	1:84721241-84721960	720	3.06129	4.34085	4.05997	3.73961	3.47247	4.79543	53	66	62	61	55	75
NONRATT003879.2	NONRATT003879.2	PMID24510058	serklaw.aSep08-unspliced	-	1:266646038-266646850	813	0.409228	0.465947	0.579906	0.868695	0.670948	0.849387	8	8	10	16	12	15
NONRATT006978.2	NONRATT006978.2	PMID24510058	Pvrl3.eSep08	-	11:57937650-57949550	678	13.9851	12.2228	10.2919	14.1925	8.78323	11.3392	228	175	148	218	131	167
NONRATT019962.2	NONRATT019962.2	PMID24510058	Slc35c2.hSep08	-	3:161806761-161812259	816	3.26174	0.754438	0.808907	0.432723	0.891308	5.75452	64	13	14	8	16	102
ENSRNOT00000085833	NONRATT033855.1	ensembl	-	AABR07040906.1	X:113550392-113582564	1186	0.0701227	0	0.119249	0	0	0	2	0	3	0	0	0
NONRATT017872.2	NONRATT017872.2	PMID24510058	pochu.aSep08-unspliced	-	3:2498494-2499476	983	2.19994	2.55319	2.59005	2.82888	3.69952	3.41876	52	53	54	63	80	73
NONRATT016144.2	NONRATT016144.2	PMID24510058	Ghr.cSep08	-	2:53166018-53413639	725	1.95031	1.11038	0.715364	1.46117	2.5707	0.571504	34	17	11	24	41	9
NONRATT009416.2	NONRATT009416.2	PMID24510058	Ldb2.dSep08	-	14:71107670-71110854	471	2.11912	2.01079	1.30136	2.34291	2.02681	1.95479	24	20	13	25	21	20
NONRATT000625.2	NONRATT000625.2	PMID24510058	zf-C2H2.131.aSep08-unspliced	-	1:94892609-94893141	533	14.8247	17.0583	21.407	20.2894	19.1896	22.3702	190	192	242	245	225	259
NONRATT021808.2	NONRATT021808.2	PMID24510058	rorwey.aSep08	-	4:153834686-153836103	446	0.18647	0.21234	0	0.197927	0	0.929014	2	2	0	2	0	9
NONRATT003865.2	NONRATT003865.2	PMID24510058	pawflo.fSep08	-	1:266048906-266052891	730	0.398794	0.0648656	0	1.51166	0	0	7	1	0	25	0	0
NONRATT015341.2	NONRATT015341.2	PMID24510058	Rsrc1.cSep08	-	2:164131249-164363533	686	4.12238	3.45151	2.7492	3.02418	3.04822	3.28826	68	50	40	47	46	49
NONRATT007313.2	NONRATT007313.2	PMID24510058	flalaw.aSep08-unspliced	-	12:16091419-16091815	397	1.15227	0.596371	0.950149	1.55661	1.25954	0.927662	11	5	8	14	11	8
NONRATT027496.2	NONRATT027496.2	PMID24510058	Dnm2.eSep08	-	8:22512446-22514061	714	10.9501	12.4687	8.98064	9.21123	11.3327	11.2189	188	188	136	149	178	174
NONRATT014389.2	NONRATT014389.2	PMID24510058	kludor.aSep08-unspliced	-	19:56327430-56328095	666	0.18731	0.213297	0.353952	0.463944	0.136541	0.552976	3	3	5	7	2	8
NONRATT026228.2	NONRATT026228.2	PMID24510058	Saps2.bSep08-unspliced	-	7:130258843-130259260	418	1.89032	1.47278	3.27108	2.00632	1.63125	2.20264	19	13	29	19	15	20
NONRATT025810.2	NONRATT025810.2	PMID24510058	Ptprb.cSep08	-	7:59349599-59350389	377	0.7722	1.88415	0.750416	0.819594	1.56757	3.54123	7	15	6	7	13	29
MSTRG.9836.2	-	-	-	-	17:86901305-86902225	852	0.0488061	0.333464	1.16209	0.621711	1.17379	1.08064	1	6	21	12	22	20
NONRATT029759.2	NONRATT029759.2	PMID24510058	wapey.aSep08-unspliced	-	9:121916692-121918727	2036	0.102139	0.232596	0.0694644	0.0867147	0.13397	0.113065	5	10	3	4	6	5
NONRATT012508.2	NONRATT012508.2	PMID24510058	Tbce.dSep08	-	17:54018456-54022273	1108	2.40215	2.73529	2.59572	2.58945	2.50265	2.32673	64	64	61	65	61	56
NONRATT031228.2	NONRATT031228.2	PMID24510058	Lass5.eSep08-unspliced	-	7:141391823-141392356	534	0.311481	0.44337	0.441445	0.49593	0.3405	0.689666	4	5	5	6	4	8
NONRATT012931.2	NONRATT012931.2	PMID24510058	Serpinb6b.cSep08	-	17:32771464-32775506	736	0.282546	0.321684	0.128128	0.239879	0.308794	0.250191	5	5	2	4	5	4
NONRATT016370.2	NONRATT016370.2	PMID24510058	Elf2.eSep08	-	2:140322478-140366132	418	1.4924	1.3595	1.91757	1.37276	2.61007	2.20264	15	12	17	13	24	20
NONRATT029996.2	NONRATT029996.2	PMID24510058	Gag_p30.8.bSep08	-	9:54522990-54526261	356	0.233611	0	0.264894	0.124045	0.127655	0.129378	2	0	2	1	1	1
NONRATT005928.2	NONRATT005928.2	PMID24510058	Ube2z.bSep08-unspliced	-	10:83880768-83881429	662	0.942329	1.14453	0.854632	2.06698	1.37338	1.32129	15	16	12	31	20	19
MSTRG.8604.1	-	-	-	-	16:20175269-20175960	625	0	0.075763	1.43328	0	7.56422	0	0	1	19	0	104	0
NONRATT020351.2	NONRATT020351.2	PMID24510058	Cald1.dSep08	-	4:62258683-62265698	418	0.994899	1.01965	0.902414	0.950389	1.19626	1.21151	10	9	8	9	11	11
NONRATT021613.2	NONRATT021613.2	PMID24510058	Chst13.aSep08-unspliced	-	4:122224579-122225297	719	0.0578342	0.065858	0.0655456	0.122776	0.0632061	0.0640591	1	1	1	2	1	1
NONRATT007747.2	NONRATT007747.2	PMID24510058	Arpc1b.bSep08	-	12:11250953-11253132	2048	2.23368	2.01164	0.253242	0.431055	2.41939	1.30375	110	87	11	20	109	58
NONRATT014422.2	NONRATT014422.2	PMID24510058	zeydar.bSep08	-	19:59754807-59757906	307	0.677375	0.771203	0	0.287543	0.44424	0.299904	5	5	0	2	3	2
NONRATT004441.2	NONRATT004441.2	PMID24510058	sheymee.aSep08-unspliced	-	10:55989194-55990531	1338	2.73519	2.44205	3.55905	2.4412	4.48466	3.19981	88	69	101	74	132	93
NONRATT024602.2	NONRATT024602.2	PMID24510058	Vrk1.eSep08	-	6:129835936-129879427	793	0.367112	1.31373	0.832369	0.723598	0.630562	0.696624	7	22	14	13	11	12
NONRATT002536.2	NONRATT002536.2	PMID24510058	Hpn.bSep08	-	1:89538032-89549596	1004	4.92915	5.84856	6.05791	7.95749	7.28959	7.65737	119	124	129	181	161	167
NONRATT030615.2	NONRATT030615.2	PMID24510058	rawby.bSep08-unspliced	-	X:74409978-74410518	541	1.30682	1.05041	1.13298	1.30545	1.17637	1.44662	17	12	13	16	14	17
NONRATT002459.2	NONRATT002459.2	PMID24510058	Rps16.bSep08-unspliced	-	1:85406469-85408082	1614	1.57177	2.52323	1.28532	1.20332	1.04209	1.19797	61	86	44	44	37	42
NONRATT018951.2	NONRATT018951.2	-	-	-	3:172205404-172206703	747	2.11554	1.71164	1.64101	1.53631	1.39962	1.78721	38	27	26	26	23	29
NONRATT007757.2	NONRATT007757.2	PMID24510058	jorlaw.aSep08-unspliced	-	12:12409871-12411750	1880	0.685737	0.528955	0.326032	32.1658	0.16926	0.220394	31	21	13	1370	7	9
NONRATT029547.2	NONRATT029547.2	PMID24510058	Accn4.bSep08	-	9:82667522-82668262	413	0.100685	0	0	0	0.110037	0.334453	1	0	0	0	1	3
NONRATT005738.2	NONRATT005738.2	PMID24510058	skawmee.aSep08	-	10:66816952-66842737	508	0.491214	0.652486	0.835308	0.868854	0.626395	0.996871	6	7	9	10	7	11
NONRATT026332.2	NONRATT026332.2	PMID24510058	Tenc1.eSep08	-	7:143717486-143718435	295	0.563834	0.481544	0.319669	0.448934	0.154052	0.624206	4	3	2	3	1	4
ENSRNOT00000086168	NONRATT032562.1	ensembl	-	AABR07007853.1	2:31386066-31388447	480	0.346523	0.394599	0.982216	0.367815	0.473484	0.479582	4	4	10	4	5	5
NONRATT025045.2	NONRATT025045.2	PMID24510058	Sec23a.bSep08	-	6:80072206-80084765	700	0.237616	0.202937	0.134718	0.252216	0.194831	0.197327	4	3	2	4	3	3
NONRATT020112.2	NONRATT020112.2	PMID24510058	LOC502710.bSep08	-	4:6083819-6164627	503	6.20085	9.32031	10.1233	11.2324	8.49512	11.898	75	99	108	128	94	130
NONRATT023970.2	NONRATT023970.2	PMID24510058	kotu.cSep08-unspliced	-	6:1516166-1516866	701	0.415292	0.472843	0.874381	0.44078	0.648488	1.18207	7	7	13	7	10	18
NONRATT027288.2	NONRATT027288.2	PMID24510058	smarta.aSep08-unspliced	-	7:137974005-137975146	1142	5.82659	5.5565	4.16988	5.72041	7.24464	5.88553	160	134	101	148	182	146
NONRATT005133.2	NONRATT005133.2	PMID24510058	rormer.aSep08-unspliced	-	10:109180990-109183314	2325	1.84235	2.79036	2.47402	3.07556	2.1116	2.03944	103	137	122	162	108	103
NONRATT022766.2	NONRATT022766.2	PMID24510058	Ece1.bSep08	-	5:156271648-156277627	372	1.45327	1.52761	1.26738	1.66122	1.83296	2.22751	13	12	10	14	15	18
MSTRG.20013.1	-	-	-	-	7:97255036-97260010	4953	4.30734	6.09022	3.40786	4.79452	5.76371	6.04148	513	637	358	538	628	650
NONRATT014560.2	NONRATT014560.2	PMID24510058	Zswim4.bSep08	-	19:25324016-25324274	259	0.642205	0.731303	0.54606	1.193	0.702034	0.888801	4	4	3	7	4	5
NONRATT017076.2	NONRATT017076.2	PMID24510058	Tesb.eSep08	-	20:4178778-4188084	319	0	0.148438	0	0	0.56999	0.144384	0	1	0	0	4	1
NONRATT010092.2	NONRATT010092.2	PMID24510058	Slc35e4.bSep08-unspliced	-	14:84169546-84170906	1361	1.19169	0.765458	0.727482	0.58378	0.400794	1.01477	39	22	21	18	12	30
NONRATT024883.2	NONRATT024883.2	PMID24510058	Hadhb.dSep08	-	6:27565694-27582980	683	0	2.01068	0	0	0	0	0	29	0	0	0	0
NONRATT001880.2	NONRATT001880.2	PMID24510058	Vti1a.bSep08	-	1:276373393-276546052	578	0.28777	0.163847	0.326306	0.152726	0.314579	0.159291	4	2	4	2	4	2
NONRATT008209.2	NONRATT008209.2	PMID24510058	snoykey.aSep08-unspliced	-	13:50052252-50052835	584	3.2045	3.24344	4.27884	3.93023	3.5028	3.7838	45	40	53	52	45	48
NONRATT013875.2	NONRATT013875.2	PMID24510058	pleedoy.aSep08	-	18:61410707-61422378	357	0.116478	0.132638	0.132009	0.123698	0.127298	0.129015	1	1	1	1	1	1
NONRATT019740.2	NONRATT019740.2	PMID24510058	Rbbp9.bSep08-unspliced	-	3:138701314-138703436	2123	0.391774	0.379194	0.46637	0.436607	0.792244	0.542112	20	17	21	21	37	25
NONRATT029892.2	NONRATT029892.2	PMID24510058	Imp4.dSep08	-	9:37771470-37775141	718	0.521288	0.659562	0.328317	0.491786	0.443188	0.641159	9	10	5	8	7	10
NONRATT005700.2	NONRATT005700.2	PMID24510058	kleymee.aSep08	-	10:64360458-64361420	258	0.161173	0.183534	0.182664	0.171163	0.176144	0	1	1	1	1	1	0
NONRATT015282.2	NONRATT015282.2	PMID24510058	narshee.aSep08	-	2:142235152-142236662	363	0.343659	0.130446	0.129827	0.243183	0.125193	0.253638	3	1	1	2	1	2
NONRATT013861.2	NONRATT013861.2	PMID24510058	gufar.aSep08-unspliced	-	18:57215611-57216221	611	0.34035	0.154998	1.15752	0.794661	0.446421	0.828823	5	2	15	11	6	11
NONRATT017462.2	NONRATT017462.2	PMID24510058	LOC365601.cSep08	-	20:49301758-49325119	423	1.67136	3.13462	1.67197	2.60877	1.7194	2.50315	17	28	15	25	16	23
NONRATT021736.2	NONRATT021736.2	PMID24510058	storzor.aSep08-unspliced	-	4:162831892-162832224	333	1.24885	1.27992	0.991094	2.12087	2.18411	0	10	9	7	16	16	0
NONRATT023826.2	NONRATT023826.2	PMID24510058	zf-C2H2.73.aSep08-unspliced	-	5:164225166-164225628	463	10.0599	12.887	15.0711	8.4848	10.8	10.4401	112	126	148	89	110	105
ENSRNOT00000082386	NONRATT031419.1	ensembl	-	AABR07004868.2	1:163459074-163461083	896	0.881867	0.687077	0.420992	0.541895	0.405864	0.513786	19	13	8	11	8	10
NONRATT005710.2	NONRATT005710.2	-	-	-	10:63798202-63805649	375	6.98665	7.19786	5.78349	10.005	10.4251	7.36576	63	57	46	85	86	60
NONRATT019585.2	NONRATT019585.2	-	-	-	3:110012041-110017165	586	0.283841	0.16161	0.402273	0.225999	0.155182	0.314234	4	2	5	3	2	4
NONRATT021138.2	NONRATT021138.2	PMID24510058	RGD1562135.bSep08	-	4:10213555-10230936	743	7.83606	7.64812	7.93208	9.2082	6.4853	8.05474	140	120	125	155	106	130
NONRATT001866.2	NONRATT001866.2	PMID24510058	dawklee.aSep08-unspliced	-	1:274247880-274248399	520	0.559845	1.09283	1.26936	2.20698	1.22388	1.6821	7	12	14	26	14	19
ENSRNOT00000077785	NONRATT033765.1	ensembl	-	AABR07068341.1	9:99556540-99566978	2282	3.71771	3.58998	3.03717	2.47586	2.72907	2.42082	204	173	147	128	137	120
ENSRNOT00000077787	ENSRNOT00000077787	ensembl:lincRNA	-	AABR07071904.1	1:94836296-94840706	3481	0.179208	0.312881	0.230263	0.114123	0.195881	0.0396808	15	23	17	9	15	3
ENSRNOT00000088340	NONRATT033038.1	ensembl	-	AABR07059372.1	4:16827987-16831712	453	0.0917942	0.209059	0.208173	0	0.100321	0	1	2	2	0	1	0
NONRATT021580.2	NONRATT021580.2	PMID24510058	dazee.aSep08-unspliced	-	4:119372458-119373110	653	0	0.0725144	0.79424	0.47318	0.417708	0.0705337	0	1	11	7	6	1
NONRATT001854.2	NONRATT001854.2	PMID24510058	roylar.aSep08-unspliced	-	1:273144252-273144672	421	0	0	1.56786	0	1.61963	0	0	0	14	0	15	0
NONRATT009586.2	NONRATT009586.2	PMID24510058	Spred2.bSep08-unspliced	-	14:104290840-104292828	1989	12.9006	12.0946	11.1886	11.7618	13.0958	14.3733	617	508	472	530	573	621
NONRATT028855.2	NONRATT028855.2	PMID24510058	Snx14.dSep08	-	8:96070494-96088676	472	0.0880991	0.200644	0.199793	0.0935595	0.192662	0.390129	1	2	2	1	2	4
NONRATT028299.2	NONRATT028299.2	PMID24510058	sweypoy.aSep08-unspliced	-	8:21440471-21442071	1601	3.19503	3.5198	3.91677	3.22571	2.98131	3.82436	123	119	133	117	105	133
NONRATT024420.2	NONRATT024420.2	PMID24510058	Churc1.bSep08	-	6:99817460-99831463	258	3.22378	1.10121	3.83761	3.93502	2.99534	0.535383	20	6	21	23	17	3
NONRATT010583.2	NONRATT010583.2	PMID24510058	Rcbtb2.iSep08	-	15:55033447-55054530	700	3.38637	3.38248	3.50245	2.64839	2.46775	2.95944	57	50	52	42	38	45
[truncated: 19,251 more rows]
